1 **A Western Dietary Pattern during Pregnancy is Associated with Neurodevelopmental Disorders**  
2 **in Childhood and Adolescence**

3 *David Horner MD MSc<sub>1</sub>, Jens Richardt M. Jepsen, MSc PhD<sub>2+3</sub>, Bo Chawes, MD PhD DMSc<sub>1</sub>, Kristina*  
4 *Aagaard MD<sub>1</sub>, Julie B. Rosenberg MD<sub>1+2+4</sub>, Parisa Mohammadzadeh MD<sub>1+2+4</sub>, Astrid Sevelsted MSc*  
5 *PhD<sub>1</sub>, Nilo Følsgaard MD PhD<sub>1</sub>, Rebecca Vinding MD PhD<sub>1</sub>, Birgitte Fagerlund PhD<sub>2+5</sub>, Christos Pantelis*  
6 *MBBS MD<sub>6+7</sub>, Niels Bilenberg MD PhD<sub>8</sub>, Casper-Emil T. Pedersen, MSc PhD<sub>1</sub>, Anders Eliassen MD,*  
7 *PhD<sub>1+9</sub>, Yulu Chen, PhD<sub>10</sub>, Nicole Prince, PhD<sub>10</sub>, Su H. Chu, PhD<sub>10</sub>, Rachel S. Kelly, PhD<sub>10</sub>, Jessica*  
8 *Lasky-Su, ScD<sub>10</sub>, Thorhallur I. Halldorsson, PhD<sub>11+12</sub>, Marin Strøm, PhD<sub>12+13</sub>, Katrine Strandberg-Larsen,*  
9 *PhD<sub>14</sub>, Sjurdur F. Olsen, PhD<sub>12+13+14+15</sub>, Birte Y. Glenthøj, MD DMSc<sub>2+4</sub>, Klaus Bønnelykke, MD PhD<sub>1</sub>,*  
10 *Bjørn H. Ebdrup\*, MD PhD<sub>2+4</sub>, Jakob Stokholm\*, MD PhD<sub>1+16</sub>, Morten Arendt Rasmussen\*, PhD<sub>1+16</sub>*

11 *\*These authors contributed equally to this work*

12

13 **Affiliations:**

- 14 1) *COPSAC, Copenhagen Prospective Studies on Asthma in Childhood, Herlev and Gentofte Hospital,*  
15 *University of Copenhagen, Denmark*
- 16 2) *Center for Neuropsychiatric Schizophrenia Research (CNSR) & Centre for Clinical Intervention and*  
17 *Neuropsychiatric Schizophrenia Research (CINS), Mental Health Centre Glostrup, University of*  
18 *Copenhagen, Glostrup, Denmark*
- 19 3) *Mental Health Centre for Child and Adolescent Psychiatry - Research unit, Mental Health Services in the*  
20 *Capital Region of Denmark, Copenhagen, Denmark*
- 21 4) *Department of Clinical Medicine, Faculty of Health and Medical Sciences, University of Copenhagen,*  
22 *Copenhagen, Denmark*
- 23 5) *Department of Psychology, University of Copenhagen, Copenhagen, Denmark*
- 24 6) *Melbourne Neuropsychiatry Centre, Department of Psychiatry, The University of Melbourne & Melbourne*  
25 *Health, Carlton South, VIC, Australia*
- 26 7) *Florey Institute of Neuroscience & Mental Health, Parkville, VIC, Australia*
- 27 8) *Institute of Clinical Research, University of Southern Denmark, Odense, Denmark*
- 28 9) *Department of Health Technology, Section for Bioinformatics, Technical University of Denmark, Kgs.*  
29 *Lyngby, Denmark*

**NOTE: This preprint reports new research that has not been certified by peer review and should not be used to guide clinical practice.**

- 30           10) *Channing Division of Network Medicine, Brigham and Women's Hospital, Harvard Medical School,*  
31                 *Boston, MA, USA*
- 32           11) *Faculty of Food Science and Nutrition, School of Health Science, University of Iceland, Health Science*  
33                 *Institute, Unit for Nutrition Research, Iceland*
- 34           12) *Department of Epidemiology Research, Statens Serum Institut, Copenhagen, Denmark*
- 35           13) *Faculty of Health Sciences, University of the Faroe Islands, Tórshavn, Faroe Islands*
- 36           14) *Section of Epidemiology, Department of Public Health, University of Copenhagen, Denmark*
- 37           15) *Department of Nutrition, Harvard T.H. Chan School of Public Health, Boston, MA, USA*
- 38           16) *Section of Food Microbiology, Gut Health and Fermentation, Department of Food Science, University of*  
39                 *Copenhagen, Denmark*

40 **ABSTRACT**

41 Despite the high prevalence of neurodevelopmental disorders, there is a notable gap in clinical studies  
42 exploring the impact of maternal diet during pregnancy on child neurodevelopment. This observational  
43 clinical study examined the association between pregnancy dietary patterns and neurodevelopmental  
44 disorders, as well as their symptoms, in a prospective cohort of 10-year-old children (n=508). Data-  
45 driven dietary patterns were derived from self-reported food frequency questionnaires. A Western  
46 dietary pattern in pregnancy (per SD change) was significantly associated with attention-deficit /  
47 hyperactivity disorder (ADHD) (OR 1.66 [1.21 - 2.27], p=0.002) and autism diagnosis (OR 2.22 [1.33 -  
48 3.74], p=0.002) and associated symptoms (p<0.001). Findings for ADHD were validated in three large  
49 (n=59725, n=656, n=348), independent mother-child cohorts. Objective blood metabolome modelling  
50 at 24 weeks gestation identified 15 causally mediating metabolites which significantly improved ADHD  
51 prediction in external validation. Temporal analyses across five blood metabolome timepoints in two  
52 independent mother-child cohorts revealed that the association of Western dietary pattern metabolite  
53 scores with neurodevelopmental outcomes was consistently significant in early to mid-pregnancy,  
54 independent of later child timepoints. These findings underscore the importance of early intervention  
55 and provide robust evidence for targeted prenatal dietary interventions to prevent neurodevelopmental  
56 disorders in children.

## 57 INTRODUCTION

58 Neurodevelopmental disorders, particularly attention-deficit/hyperactivity disorder (ADHD) and autism,  
59 are prevalent and an increasing public health concern (1). In 2020, Danish registers reported a  
60 cumulative incidence of 5.9% in males and 3% in females for ADHD, and 4.3% in males and 1.8% in  
61 females for autism during childhood and adolescence (2). Large meta-analyses support these findings,  
62 with global estimates of 5.9% for ADHD (3) and up to 1.1% for autism (4). In addition,  
63 neurodevelopmental disorder symptoms manifest as continuous traits within the paediatric general  
64 population (5), and can be reliably captured via validated questionnaires (6,7). Studies have linked  
65 several prenatal exposures to neurodevelopmental disorders in children, including maternal obesity,  
66 metabolic disturbances, stress, and individual nutritional elements (8). Numerous animal studies have  
67 shown that high-fat diets can alter brain morphology (9) and behaviour in offspring in ways resembling  
68 neurodevelopmental disorders (10,11), however these findings may not extrapolate well to humans.  
69 Dietary constituents may contribute directly to the aforementioned aetiologies, providing both the  
70 energy substrates and building blocks for the foetal brain (12). Given the potential public health impact,  
71 it is vital to robustly investigate the link between maternal diet during pregnancy and childhood  
72 neurodevelopmental disorders, particularly those involving Western diets characterised by high  
73 consumption of processed meats, sugars, refined grains, and low intakes of fruits and vegetables.  
74 These diets, which are prevalent in modern societies, starkly contrast with historical human diets and  
75 may influence developmental outcomes (13). Existing literature lacks objective measurements of  
76 dietary patterns in pregnancy, and adjustment for confounding dietary patterns in childhood, when  
77 assessing this relationship.

78 The placenta transfers nutrients from the mother to the developing foetus during pregnancy (14). These  
79 nutrients, which include the essential n-3 long chain polyunsaturated fatty acids (n3-LCPUFA) and  
80 micronutrients such as iron, choline, iodine, zinc, and vitamins B, D, and E, are necessary for foetal  
81 brain development and function (12,15), and are obtained as part of a healthy dietary pattern. While the  
82 precise mechanisms underlying the influence of maternal diet on offspring neurodevelopment remain  
83 to be fully elucidated, various factors may be implicated in developmental processes. Among these  
84 factors are the potential impacts of dietary compounds (16) and lipid profiles (17). For example, certain  
85 dietary-derived metabolites may interact with developmental pathways in the foetus, potentially

86 affecting neurodevelopmental outcomes (18). Additionally, higher maternal intakes of n3-LCPUFAs,  
87 such as docosahexaenoic acid (DHA) and eicosapentaenoic acid (EPA), which are associated with  
88 better overall diet quality (19), are reported to be neuroprotective (20).

89 Genetics contribute significantly to neurodevelopmental disorders, with heritability estimates as high as  
90 80% (21). The increasing prevalence of these disorders (22) highlight the need for a better  
91 understanding of how environmental factors interact with genetic risk (23). In this context, pregnancy  
92 dietary influences may be moderated by the child's underlying genetic risk for neurodevelopmental  
93 disorders, which can be succinctly captured in a polygenic risk score (PRS) (24). While twin studies  
94 consider gene-environment interactions when estimating heritability, clinical evidence validating this  
95 potential interaction is notably lacking (25).

96 In this study, we hypothesise that a Western dietary pattern in pregnancy is associated with adverse  
97 neurodevelopmental outcomes. We sought to bridge the research gap by leveraging the thorough  
98 neurodevelopmental clinical examinations within the Copenhagen Prospective Studies on Asthma in  
99 Childhood 2010 (COPSAC2010) mother-child cohort. We employ external validation approaches in  
100 three independent mother-child cohorts. Drawing from twelve metabolome datasets from three mother-  
101 child cohorts, we juxtapose maternal and child blood profiles to shed light on the temporality of dietary  
102 associations and their potential impact on neurodevelopment and delve into which metabolites may be  
103 driving dietary associations on neurodevelopment.

## 104 RESULTS

### 105 Cohort Characteristics

106 During the 10-year clinical visit, a total of 593 children (84.7%) participating in the COpenhagen  
107 Prospective Study on Neuro-PSYCHiatric Development study (COPSYCH) underwent clinical  
108 examination for neurodevelopmental and other psychiatric disorders. Additionally, 11 children who did  
109 not complete the clinical examination, had information regarding their neurodevelopmental symptom  
110 loads. There were no significant differences in baseline sociodemographic characteristics between  
111 participants and non-participants at the 10-year visit (*Table S1*), nor between male and female children  
112 (*Table S2*).

113 We included 508 children with both pregnancy dietary and clinical data in our analysis, 77 (15.2%, 71%  
114 male) had any neurodevelopmental disorder. Specifically, 55 (10.8%, 76% male) were diagnosed with  
115 ADHD (25 ADHD predominantly inattentive presentation and 30 ADHD combined presentation) and 13  
116 (2.6%, 69% male) with autism.

### 117 Identification of Dietary Patterns

118 We used principal component analysis (PCA) on 95 nutrient constituents (*Table S3*) from pregnancy  
119 food frequency questionnaires (FFQ) assessed at 24 weeks gestation to identify maternal dietary  
120 patterns in the COPSAC2010 cohort (*Figure S1*). Principal component 1 (PC1), which explained 44.3%  
121 of the variance, had a positive association across all food groups and represents a "Varied dietary  
122 pattern". PC2, which explained 10.7% of the variance, had positive associations with intakes of animal  
123 fats, refined grains and high-energy drinks, and negative associations with intakes of fruit, fish, and  
124 vegetables, representing a "Western dietary pattern" (*Figure 1*). Regarding macronutrient intake, PC2  
125 (Western dietary pattern) predominantly reflected a higher intake of fats (*Figure S2A*), specifically  
126 saturated fatty acids (*Figure S2B*). Using the maternal PC model, we predicted a child's Western dietary  
127 pattern at 10-years, allowing for a consistent comparison of dietary habits ( $r=0.22$ ). A Western dietary  
128 pattern during pregnancy was negatively associated with social circumstances and positively  
129 associated with maternal pre-pregnancy body mass index (BMI), smoking during pregnancy, antibiotic  
130 use during pregnancy and a Western dietary pattern in children at 10-years of age (*Table 1*).

## 131 **A Western Dietary Pattern during Pregnancy is Associated with Neurodevelopmental Disorders** 132 **and Symptom Loads in Children**

133 A Western dietary pattern during pregnancy (PC2, per SD change) was significantly associated with  
134 any neurodevelopmental disorder (OR 1.53 [1.17-2.00],  $p=0.002$ ), ADHD (OR 1.66 [1.21-2.27],  
135  $p=0.002$ ), and autism (OR 2.22 [1.33-3.74],  $p=0.002$ ) (*Table 2*) in multivariate modelling adjusted for  
136 pre-pregnancy maternal BMI, social circumstances, child sex, birth weight, gestational age, pregnancy  
137 smoking/antibiotic use, pre-eclampsia and a child Western dietary pattern. It was also significantly  
138 associated with symptom loads for ADHD (1.73 [0.98-2.49],  $p<0.001$ ) and autism (3.21 [1.69-4.74],  
139  $p<0.001$ ), with consistent associations observed in an earlier assessment of ADHD symptom load at 8  
140 years (1.90 [0.42-4.55],  $p<0.001$ ). Moreover, ADHD symptoms at 6 years, assessed using the  
141 hyperactivity/inattention scale from the Strengths and Difficulties Questionnaire (SDQ), were also  
142 significant (0.50 [0.29-0.70],  $p<0.001$ ). To illustrate the associations between the Western dietary  
143 pattern during pregnancy, neurodevelopmental outcomes, and model covariates, we employed  
144 Gaussian graphical models (*Figure 2*).

145 Our findings remained significant after further adjustment for maternal genetic risk for ADHD, total  
146 maternal energy intake, genomic principal components, intake of prenatal supplements (*Table S4*), and  
147 two prenatal nutrition supplementation randomised controlled trials (n3-LCPUFA and high-dose D  
148 vitamin) (*Table S5*). Associations of the pregnancy Western dietary pattern were significant for both  
149 male (1.42 [1.02-1.99],  $p=0.039$ ) and female children (1.86 [1.15-3.07],  $p=0.012$ ) for any  
150 neurodevelopmental disorder diagnosis (*Table S6*). Neurodevelopmental outcomes showed no  
151 significant differences related to child sex ( $p$ -interaction $>0.12$ ). Associations were comparable for both  
152 ADHD-predominantly inattentive presentation (OR 1.71 [1.13-2.56],  $p=0.009$ ) and ADHD-combined  
153 presentation (OR 1.51 [1.03-2.20],  $p=0.033$ ). In a subanalysis in children without a neurodevelopmental  
154 disorder diagnosis ( $n=428$ ), the pregnancy Western dietary pattern association with ADHD symptom  
155 load remained significant (0.63 [0.01-1.25],  $p=0.048$ ) (*Table S7*).

## 156 **Validating our findings for ADHD in the Danish National Birth Cohort**

157 We sought replication of our findings in the Danish National Birth Cohort (DNBC), which had an identical  
158 FFQ assessment undertaken at a comparable gestational age, neurodevelopmental diagnoses derived

159 from national registries, and ADHD symptoms from the hyperactivity/inattention scale of the SDQ  
160 questionnaire. In our replication analysis including 59,725 mother-child pairs, we observed prevalences  
161 of 6.8% for any neurodevelopmental disorder, 4.6% for ADHD diagnosis, and 2.7% for autism diagnosis.  
162 We found that the association of the Western dietary pattern in pregnancy, trained in the COPSAC2010  
163 cohort, was significantly associated with ADHD diagnosis (OR 1.07 [1.02-1.11],  $p=0.002$ ), but not for  
164 any neurodevelopmental disorder diagnosis (OR 1.03 [1.00-1.07],  $p=0.087$ ) or autism diagnosis (OR  
165 1.04 [0.98-1.09],  $p=0.351$ ), in multivariable analysis (*Table S8*). Reinforcing our method, we observed  
166 PC2 trained within the DNBC cohort was also significantly associated with ADHD diagnosis (OR 1.05  
167 [1.01-1.10],  $p=0.018$ ), with a strong correlation between PC2 trained in COPSAC2010 and the DNBC  
168 ( $r=0.91$ ). Moreover, ADHD symptoms at 7 years, assessed in a subset of 37,608 children, were also  
169 significantly associated with the Western dietary pattern in pregnancy, trained in COPSAC2010 (0.11  
170 [0.09-0.13]  $p<0.001$ ), and within the DNBC (0.11 [0.09-0.13]  $p<0.001$ ), in multivariable analysis.

### 171 **A Blood Metabolomics-Derived Pregnancy Western Dietary Pattern Score Is Associated with** 172 **Neurodevelopmental Disorders in COPSAC2010**

173 We used the blood metabolome from week 24 gestation to objectively measure the pregnancy Western  
174 dietary pattern and validate our self-reported FFQ findings. 43.0% of 760 metabolites were significantly  
175 associated with the pregnancy Western dietary pattern, with 34.5% surviving false discovery rate  
176 ( $q<0.05$ ). In blood metabolome modelling of the pregnancy Western dietary pattern, 43 metabolites  
177 emerged as biomarkers (RMSECV=0.87,  $R^2CV=0.24$ ). Loadings for these metabolites can be seen in  
178 *Figure 3* and *Table S9*.

179 A Western dietary pattern-metabolite score (WDP-MS) was derived from this model and was associated  
180 (per SD change) with any neurodevelopmental disorder diagnosis (OR 1.42 [1.07-1.90],  $p=0.017$ ), and  
181 ADHD diagnosis (OR 1.39 [1.00-1.95],  $p<0.05$ ), but not significantly with autism diagnosis (OR 1.09  
182 [0.59-2.00],  $p=0.781$ ).

183 To discern whether any of the 43 metabolites acted as biomarkers, or genuine mediators in the  
184 association between the Western dietary pattern and neurodevelopmental disorders, we deployed a  
185 backward elimination strategy. Our multivariable mediation analysis, found that 15 metabolites (*Figure*  
186 *3*, *Table S9*) mediated the association between the Western dietary pattern and any



187 neurodevelopmental disorder diagnosis. The Western dietary pattern had a total effect of 5.5% on any  
188 neurodevelopmental disorder diagnosis, of which 80.3% ( $p=0.003$ ) was mediated through the selected  
189 15 metabolites. It became evident that a predominant portion of the metabolites acting as mediators  
190 were derived from dietary components and lipids. Prominently, plant-based metabolites such as  
191 ergothioneine, carotene diol, and tartrate indicate potential protective effects. Conversely, many lipid-  
192 associated metabolites, such as medium chain fatty acids like caprate and caprylate, predominantly  
193 exhibited positive loadings, underscoring their possible detrimental impact on neurodevelopment.

194 We explored potential time-dependent associations by predicting an additional four WDP-MS using  
195 comparable blood metabolome datasets in mothers (one week postpartum) and children (6 months, 18  
196 months, and 6 years). In a sensitivity analysis, which compared the five WDP-MS without including  
197 other covariates, significant associations were observed solely with the 24 week gestational WDP-MS  
198 for any neurodevelopmental disorder diagnosis (OR 1.50 [1.07-2.11],  $p=0.020$ ), ADHD diagnosis (OR  
199 1.58 [1.08-2.33],  $p=0.020$ ) and directionally for autism diagnosis (OR 1.74 [0.84-3.57],  $p=0.131$ ). This  
200 was the case despite the strong correlations noted between maternal dietary metabolite scores ( $r=0.68$ ,  
201 *Table S10*). Findings were consistent for ADHD (1.43 [0.41-2.45],  $p=0.006$ ) and autism symptom loads  
202 (2.86 [0.84-4.89],  $p=0.006$ ). We substantiated these temporal associations by employing linear mixed  
203 models. Through this approach, we discerned that the initial magnitude of the Western dietary pattern  
204 during pregnancy, reflected by the model's intercept, likewise served as a predictor for any  
205 neurodevelopmental disorder (OR 1.56 [1.24-1.97],  $p<0.001$ ), ADHD diagnosis (OR 1.63 [1.25-2.12],  
206  $p<0.001$ ) but not autism diagnosis (OR 1.34 [0.813-2.18],  $p=0.242$ ). Additionally, there were likewise  
207 significant associations with ADHD (1.69 [0.99-2.40],  $p<0.001$ ) and autism symptom loads (3.65 [2.24-  
208 5.06],  $p<0.001$ ).

## 209 **Western Dietary Pattern-Metabolite Score Predicts ADHD Diagnosis in the VDAART Mother-** 210 **Child Cohort**

211 As our blood metabolome modelling of the Western dietary pattern during pregnancy was associated  
212 with ADHD diagnosis and symptom load in COPSAC2010, we sought replication of our findings in the  
213 Vitamin D Antenatal Asthma Reduction Trial cohort (VDAART), a large US-based mother-child cohort.  
214 We included participants with corresponding pregnancy blood metabolome and ADHD outcome data  
215 ( $n=656$ ). Among the children in the VDAART cohort, caregivers reported a diagnosis for ADHD or

216 attention deficit disorder for 18 children (2.7%) by age 6 years and 57 children (8.7%) by age 8 years.  
217 Significant cohort characteristic differences were observed between the COPSAC2010 and VDAART  
218 cohorts (*Table S11*), encompassing age, income, maternal education, maternal age, gestational age,  
219 maternal smoking, race, maternal pre-pregnancy BMI, birthweight, and caesarean section delivery  
220 ( $p < 0.001$ ). Supplementary Figures 3 shows the metabolomic variability in the COPSAC2010 and  
221 VDAART, illustrating closely matched variances across pregnancy samples.

222 In the VDAART cohort, which includes blood metabolome profiling at two pregnancy timepoints during  
223 early (10-18 week) and late gestation (32-38 weeks), we used COPSAC2010 cohort-trained models to  
224 predict two WDP-MS to assess their association with ADHD diagnosis. The metabolite scores at both  
225 time points were positively associated with intakes of deep-fried foods, processed meats and margarine,  
226 and negatively associated with intakes of various vegetables, whole grain foods and fruit in the VDAART  
227 cohort, as assessed by independent food frequency questionnaires (*Figure S4*). There was a strong  
228 correlation between the VDAART FFQ's principal component 1 and the predicted WDP-MS during early  
229 ( $r = 0.48$ ,  $p = 1.4 \times 10^{-46}$ ) and late ( $r = 0.46$ ,  $p = 2.3 \times 10^{-42}$ ) pregnancy, underscoring the WDP-MS validity in  
230 predicting dietary patterns across diverse populations.

231 Despite significant differences in cohort characteristics, our blood metabolomics analysis successfully  
232 replicated the univariate association between the WDP-MS and ADHD diagnosis at age 6 in both early  
233 (OR 2.64 [1.56-4.64],  $p < 0.001$ ) and late pregnancy (OR 1.85 [1.12-3.16],  $p = 0.020$ ), in the VDAART  
234 cohort. After adjusting for similar covariates to those used in the COPSAC2010 cohort, a significant  
235 association remained between the WDP-MS and ADHD diagnosis in early pregnancy (OR 2.33 [1.26-  
236 4.42],  $p = 0.008$ ) but not in late pregnancy (OR 1.67 [0.90-3.20],  $p = 0.113$ ). For further robustness of our  
237 findings, we assessed children ever having had a ADHD diagnosis up to age 8. The WDP-MS  
238 successfully univariately replicated, albeit with attenuated estimates in early (OR 1.71 [1.28-2.32],  
239  $p < 0.001$ ) and late pregnancy (OR 1.37 [1.04-1.83],  $p = 0.030$ ). Associations remained significant after  
240 multivariable adjustment in early pregnancy (OR 1.45 [1.02-2.06],  $p = 0.039$ ) but not late pregnancy (OR  
241 1.11 [0.79-1.58],  $p = 0.544$ ).

242 In sensitivity analysis, we independently employed the backward elimination strategy, previously  
243 outlined for the COPSAC2010 cohort, on the metabolites overlapping with the VDAART 10-18 weeks  
244 and 32-38 weeks time points. In doing so, we identified the mediating metabolites in the association

245 between the Western dietary pattern in COPSAC2010 to ADHD diagnosis (*Figure S5*). Leveraging  
246 COPSAC2010's mediating metabolites, we performed a sensitivity analysis to contrast the performance  
247 of a WDP-MS using only these potentially causally mediating metabolites against the WDP-MS with all  
248 metabolites, for predicting ADHD in the VDAART cohort. At the 10-18 week timepoint, in a multivariable  
249 model, the subset of mediating metabolites improved ADHD diagnosis prediction at 6 years (OR 2.85  
250 [1.60-5.20],  $p < 0.001$ ), significantly more so (nested model chi-squared test  $p = 0.012$ ) than our model  
251 with all 18 metabolites. However, at the 32-38 week timepoint the subset of mediating metabolites (OR  
252 1.81 [0.95-3.58],  $p = 0.078$ ) did not perform significantly better than the WDP-MS with all 19 metabolites  
253 (nested model chi-squared test  $p = 0.423$ ). To replicate the potential time-dependent association of the  
254 Western dietary pattern, we predicted three additional WDP-MS for children in VDAART (1 year, 3  
255 years, and 6 years). When incorporating the three child WDP-MS in a model with the two pregnancy  
256 WDP-MS timepoints, we observed significant associations only with the early pregnancy WDP-MS for  
257 ADHD diagnosis at age 6 (OR 1.97 [1.01-3.80],  $p = 0.044$ ) and ADHD diagnosis up to age 8 (OR 1.65  
258 [1.11-2.45],  $p = 0.013$ ).

### 259 **Western Dietary Pattern-Metabolite Score Predicts ADHD Symptoms in COPSAC2000**

260 We sought further replication in the COPSAC2000 mother-child cohort, where we included 328  
261 participants with both neonatal dried blood spots (DBS) metabolic profiling and ADHD symptom load  
262 from the Adult ADHD Self-Report Scale (ASRS) at age 18. We developed a Western dietary pattern dry  
263 blood spot (WDP-DBS) score using overlapping DBS metabolites from the COPSAC2010 cohort to  
264 predict the association with ADHD symptom load. Supplementary Figure 6 illustrates the metabolomic  
265 variability between the COPSAC2010 and COPSAC2000 newborn samples, demonstrating  
266 comparable variance across cohorts.

267 To substantiate the WDP-DBS score's relevance, we first confirmed its significance within the  
268 COPSAC2010 cohort, showing a strong association with ADHD symptom load, in multivariable  
269 modelling (1.19 [0.41-1.98],  $p = 0.003$ ), before applying it to COPSAC2000 data. In COPSAC2000, we  
270 successfully replicated this association between the WDP-DBS and ADHD symptom load (0.44 [0.01-  
271 0.86],  $p = 0.045$ ), but this finding didn't survive covariate adjustment (0.34 [-0.08-0.77],  $p = 0.114$ ). In  
272 sensitivity analysis, we enhanced cross-correlations between COPSAC2010 and COPSAC2000  
273 cohorts from  $>0.4$  to  $>0.6$ , and restricted the analysis to 626 metabolites with similar distributions

274 between cohorts (Kolmogorov-Smirnov  $p \geq 0.05$ ). This approach led to more pronounced univariate  
275 (0.49 [0.06-0.91],  $p=0.027$ ) and multivariable associations (0.41 [-0.02-0.83],  $p=0.062$ ).

## 276 **Moderating Effects of Genetics, Maternal BMI, and Child Sex on Diet-Neurodevelopment** 277 **Associations**

278 In a subanalysis, we investigated if established risk factors (child genetic risk (ADHD and autism PRS),  
279 maternal pre-pregnancy BMI, and child sex) moderate the association of the Western dietary pattern  
280 during pregnancy with neurodevelopmental outcomes in COPSAC2010. Supplementary Table 12  
281 provides more details on the independent associations of these factors on neurodevelopmental  
282 outcomes.

283 ADHD (11.8%) and autism (2.7%) diagnosis, had limited variability in our dataset, prompting us to  
284 assess the association of the Western dietary pattern using strata of median split maternal pre-  
285 pregnancy BMI (above and below 23.7) and PRS scores (*Figure 4A/B*). In multivariable analyses,  
286 children born to mothers with a higher BMI and with a greater genetic predisposition for the respective  
287 disorder showed the strongest associations with the Western dietary pattern. For ADHD diagnosis, this  
288 group had an odds ratio of 2.18 [1.30-3.74],  $p=0.004$ , and for autism diagnosis, it was 4.59 [2.33-9.78],  
289  $p<10^{-4}$ . When further stratified by child sex, findings continued to show consistent significance across  
290 both sexes (*Figure S7A/B*). Findings were again consistent when considering the objectively measured  
291 WDP-MS (*Figure S8A/B*).

292 To assess the association of the Western dietary pattern on ADHD and autism symptom loads, we  
293 employed a tertile split. Concordantly, we found that both ADHD and autism consistently showed that  
294 the association of the Western dietary pattern was most pronounced in children born to mothers in the  
295 highest pre-pregnancy BMI group ( $>25.4$ ) and in children with the highest genetic risk for the respective  
296 disorders (*Figure 4C/D*). For ADHD symptom load, this group had an estimate of 5.07 [3.12-7.03],  
297  $p<10^{-6}$ , and for autism symptom load it was 13.5 [9.51-17.5],  $p<10^{-10}$ . When further stratified by child  
298 sex, this pronounced association persisted significantly only for male children (ADHD: 8.24 [5.19-11.3],  
299  $p<10^{-6}$ , autism: 24.6 [19.0-30.2],  $p<10^{-4}$ ) (*Figure S7C/D*). Findings were again consistent when  
300 considering the objectively measured WDP-MS (*Figure S8A/B*). A further graphic is provided (*Figure*

301 S9) for ADHD (A-C) and autism symptom loads (D-F) showing model estimates when considering

302 maternal pre-pregnancy BMI across the categories <25, 25-30, and >30.

303

304 **DISCUSSION**

305 In our large prospective general population COPSAC2010 mother-child cohort, we observed strong  
306 associations between a Western dietary pattern during pregnancy with ADHD and autism diagnoses,  
307 as well as related symptom loads for these disorders in 10-year-old children. Our findings for ADHD  
308 were corroborated in three additional cohorts, which together encompass more than 60,000 mother-  
309 child pairs. From the 43 metabolites associated with a Western dietary pattern, a subset of 15 mediating  
310 metabolites notably strengthened the association with ADHD diagnosis in external validation. In the  
311 COPSAC2010 and VDAART cohorts, we consistently found dietary metabolite score associations in  
312 early-mid pregnancy had the strongest associations with neurodevelopmental outcomes, suggesting  
313 that this may be a particularly sensitive period of neurodevelopment to dietary influences. Finally, we  
314 observed that the association of the Western dietary pattern during pregnancy with ADHD and autism  
315 diagnoses, as well as symptom loads, was markedly stronger in children with higher genetic  
316 predisposition and maternal pre-pregnancy BMI, particularly in male children.

317 Expanding on prior research, our study, reinforced by clinically assessed outcomes, presents  
318 compelling evidence indicating a potential association between maternal dietary habits during  
319 pregnancy and child neurodevelopment. The persistence of the Western dietary pattern's association  
320 on ADHD symptoms, even in children without a neurodevelopmental disorder diagnosis, suggests that  
321 the pregnancy Western dietary pattern may also affect the subclinical population. A Norwegian study  
322 of 77,768 mother-child pairs found that higher maternal adherence to dietary guidelines was inversely  
323 correlated with ADHD diagnosis and symptom severity, while ultra-processed food was positively  
324 associated with ADHD symptom severity (26). This study revealed no link between the diet of 3-year-  
325 olds and ADHD outcomes, aligning with our results. Conversely, the Raine Study associated a Western  
326 dietary pattern in 1,799 adolescents with ADHD but did not explore maternal dietary influences (27). In  
327 a cross-cohort study of 800 pregnant women in the US, weak associations were found between  
328 established reference dietary patterns and autism-related traits and diagnosis (28). Our study adds to  
329 this existing literature by identifying potential temporal associations of a Western dietary pattern on child  
330 neurodevelopmental outcomes, using both maternal and child self-reported dietary intakes, and the  
331 objective blood metabolome (29).

332 Our findings suggest a potential interplay between the prenatal environment and child genetics that  
333 may influence child neurodevelopment. Males with high genetic risk born from mothers with high pre-  
334 pregnancy BMI had the strongest associations with the pregnancy Western dietary pattern. Twin studies  
335 support the hypothesis that such interactions play a significant role in the development of these  
336 disorders (30,31). Whilst heritability for ADHD and autism is high, with genetic influences accounting  
337 for approximately 70-80% of the phenotypic variance (32), current estimates for heritability encompass  
338 gene-environment interaction effects (33). Our findings highlight the potential significant role of the  
339 environment in the aetiology of ADHD and autism. It is worth noting that much of the heritability for  
340 ADHD and autism is explained by SNPs in regulatory regions rather than coding regions (34), providing  
341 further evidence for the role of the environment in these disorders. This may aid researchers in  
342 understanding the underlying mechanisms contributing to the development of these disorders.

343 The main strength of our study is the prospectively assessed COPSAC2010 cohort followed from  
344 pregnancy through childhood, with a deep psychiatric and dimensional psychopathological  
345 characterization provided by the COPSYCH project. We use pregnancy and early-life samples taken  
346 before onset of disease and symptoms, which allows for the identification of potential risk factors and  
347 the directionality of associations. The breadth of data from the COPSAC2010 cohort enabled the  
348 inclusion of relevant covariates, and the depth of phenotyping allowed for genetic characterisation,  
349 making assessments of gene-environment interactions possible. By utilising a validated  
350 semiquantitative food frequency questionnaire and identifying dietary patterns via data-driven  
351 approaches, our findings more accurately reflect the dietary patterns that are existing in the population  
352 (35). We validate this methodology by identifying a highly correlated dietary pattern within the DNBC.  
353 Although our analysis lacked information on morning sickness and hyperemesis gravidarum, our FFQ  
354 was registered at 24 weeks gestation with 1 month recall, outside the period when these symptoms are  
355 commonly experienced. Furthermore, universal accessibility of a uniform prenatal care in Denmark  
356 enhances the reliability of our findings. The pregnancy Western dietary pattern was derived from  
357 estimates of nutrient constituents, this approach is not novel (36), and is supported by a recent meta-  
358 analysis across 123 studies (37), which reported the reliability of FFQs to capture nutrient constituents  
359 with correlation coefficients consistently exceeding 0.5 for most nutrients. This nutrient-centric  
360 methodology may offer accurate representation of dietary patterns across diverse populations, since  
361 nutrients align more closely with biological and physiological processes than food group categories.

362 Acknowledging the limitations of FFQs, including recall bias and quantification challenges, our study  
363 incorporates blood metabolomics to provide objective biomarkers for dietary intake. This approach,  
364 while not without its own limitations, such as the transient nature of dietary-derived biomarkers, has  
365 validated the Western dietary pattern both internally, through a strong metabolomic imprint, and  
366 externally, in two independent FFQs in the VDAART cohort. Many studies have likewise found strong  
367 dietary signatures in the metabolome, suggesting this may be a promising avenue for personalised  
368 nutrition and targeted therapeutic strategies (29).

369 Our findings for ADHD were strengthened by external validation in three independent mother-child  
370 cohorts. This validation enhances the reliability and generalisability of our results, despite the presence  
371 of notable differences in cohort characteristics. The validation for ADHD diagnosis in the large-scale  
372 DNBC cohort, encompassing 59,725 mother-child pairs, underscores the significant relevance and  
373 utility of our findings in the general population. Moreover, validation from the US-based VDAART cohort  
374 demonstrates the broad applicability of our findings across diverse ethnic and racial groups, dietary  
375 habits, and socio-economic spectra. In VDAART, our external validation was significantly strengthened  
376 by focusing on a subset of metabolites identified in causal mediation analysis, implying these  
377 metabolites may be crucial intermediaries in the associations observed. Additionally, the VDAART  
378 findings enhance our understanding from COPSAC2010, with stronger associations of the Western  
379 dietary pattern for ADHD in early pregnancy (10-18 weeks), which may reflect a more sensitive period  
380 of neurodevelopment. Given this context, it may not be surprising to see weaker associations from  
381 neonatal DBS in COPSAC2000, potentially reflecting dietary intakes in late pregnancy.

382 We cannot rule out potential confounding by maternal phenotypic factors that relate to child  
383 neurodevelopmental disorders, however supplemental analysis adjusting for maternal genetic risk did  
384 not change our main findings. Given the observational nature of our data, we cannot elucidate the  
385 critical window of these dietary associations. Moreover, it is possible that there are discrepancies in the  
386 metabolomics platforms concerning metabolite detection, annotations, and cross-platform compatibility,  
387 which may introduce bias. Nevertheless, the same metabolomics platform was employed for all  
388 maternal and child timepoints in the COPSAC2010 and VDAART cohorts (HD4, Metabolon, Inc.), as  
389 well as for the DBS metabolomics profiles in both the COPSAC2010 and COPSAC2000 cohorts (38).

390 A further limitation is that metabolite scores for children, derived from modelling on pregnant mothers,



391 may not reflect dietary patterns in childhood. However, correlations between pregnancy and child  
392 metabolite scores were consistently  $\geq 0.33$  in both COPSAC2010 and VDAART. Whilst dietary intakes  
393 remain stable across pregnancy trimesters (39), our ability to distinguish potential acute effects of a  
394 pregnancy Western dietary pattern or longer-term effects is limited by our reliance on a single FFQ  
395 assessment.

396 Moving forward, future research should focus on establishing causality to further elucidate the  
397 relationship between Western dietary patterns in pregnancy and neurodevelopmental outcomes. While  
398 animal studies have provided valuable insights (40), further clinical investigations are warranted. Our  
399 findings underscore the potential for targeted prevention strategies, and conducting randomised  
400 controlled trials would be instrumental in establishing causality. Additionally, genetic studies could  
401 strengthen causal inference in our observational data (41).

402 In conclusion, a Western dietary pattern in pregnancy was strongly associated with ADHD and autism,  
403 and with symptom loads for these disorders. Our findings suggest that early to mid-pregnancy may be  
404 a particularly sensitive window during which dietary influences may impact child neurodevelopment.  
405 Highlighting specific subgroup effects, our research points towards the potential for tailored dietary  
406 guidelines during pregnancy, especially for at-risk populations. Ultimately, our research underscores  
407 the importance of developing targeted dietary interventions for pregnant women to potentially mitigate  
408 the risk of neurodevelopmental disorders in children.

## 409 **Acknowledgements**

410 We express our deepest gratitude to the children and families of the COPSAC2010, COPSAC2000 and  
411 VDAART cohorts for all their support and commitment. We acknowledge and appreciate the unique  
412 efforts of the COPSAC research team. We acknowledge all funding received by COPSAC, listed on  
413 [www.copsac.com](http://www.copsac.com). The Lundbeck Foundation (Grant no R16-A1694 and R269-2017-5); The Ministry of  
414 Health (Grant no 903516); Danish Council for Strategic Research (Grant no 0603-00280B) and The  
415 Capital Region Research Foundation have provided core support to the COPSAC research centre. This  
416 project has received funding from the European Research Council (ERC) under the European Union's  
417 Horizon 2020 research and innovation programme (grant agreement No. 946228) (BC). MAR is funded  
418 by the Novo Nordisk Foundation (Grant no NNF21OC0068517). CP was supported by an Australian  
419 National Health and Medical Research Council (NHMRC) L3 Investigator Grant (1196508) and by a  
420 grant from the Lundbeck Foundation (ID: R246-2016-3237). JL-S (R01HL123915, R01HL155742, and  
421 R01HL141826) and SHC (K01HL153941) are funded through the National Institute of Heart, Lung, and  
422 Blood Institute.

423 The Danish National Birth Cohort was established with a significant grant from the Danish National  
424 Research Foundation. Additional support was obtained from the Danish Regional Committees, the  
425 Pharmacy Foundation, the Egmont Foundation, the March of Dimes Birth Defects Foundation, the  
426 Health Foundation and other minor grants. The DNBC Biobank has been supported by the Novo  
427 Nordisk Foundation and the Lundbeck Foundation. Follow-up of mothers and children have been  
428 supported by the Danish Medical Research Council (SSVF 0646, 271-08-0839/06-066023, O602-  
429 01042B, 0602-02738B), the Lundbeck Foundation (195/04, R100-A9193), The Innovation Fund  
430 Denmark 0603-00294B (09-067124), the Nordea Foundation (02-2013-2014), Aarhus Ideas (AU R9-  
431 A959-13-S804), University of Copenhagen Strategic Grant (IFSV 2012), and the Danish Council for  
432 Independent Research (DFF – 4183-00594 and DFF - 4183-00152).

433 **Authors Contributions:**

434 DH has written the first draft of the manuscript. All co-authors have provided important intellectual input  
435 and contributed considerably to the analyses and interpretation of the data. All authors guarantee that  
436 the accuracy and integrity of any part of the work have been appropriately investigated and resolved  
437 and all have approved the final version of the manuscript. The corresponding author had full access to  
438 the data, with the exception of the DNBC cohort, where analysis was run by TH. The corresponding  
439 author had final responsibility for the decision to submit for publication.

440 **Competing Interests Statement:**

441 BE is part of the Advisory Board of Eli Lilly Denmark A/S, Janssen-Cilag, Lundbeck Pharma A/S, and  
442 Takeda Pharmaceutical Company Ltd; and has received lecture fees from Bristol-Myers Squibb,  
443 Boehringer Ingelheim, Otsuka Pharma Scandinavia AB, Eli Lilly Company, and Lundbeck Pharma A/S.  
444 BYG has been the leader of a Lundbeck Foundation Centre of Excellence for Clinical Intervention and  
445 Neuropsychiatric Schizophrenia Research (CINS) (January 2009 – December 2021), which was  
446 partially financed by an independent grant from the Lundbeck Foundation based on international review  
447 and partially financed by the Mental Health Services in the Capital Region of Denmark, the University  
448 of Copenhagen, and other foundations. All grants are the property of the Mental Health Services in the  
449 Capital Region of Denmark and administered by them. She has no other conflicts to disclose. JL-S is a  
450 scientific advisor for Precion Inc and a consultant to Tru Diagnostic, Inc.

451 Remaining authors declare no potential, perceived, or real conflict of interest regarding the content of  
452 this manuscript. The funding agencies did not have any role in design and conduct of the study;  
453 collection, management, and interpretation of the data; or preparation, review, or approval of the  
454 manuscript. No pharmaceutical company was involved in the study.

455 **References (Main Text)**

- 456 1. Bougeard C, Picarel-Blanchot F, Schmid R, Campbell R, Buitelaar J. Prevalence of Autism  
457 Spectrum Disorder and Co-morbidities in Children and Adolescents: A Systematic Literature  
458 Review. *Front Psychiatry*. 2021 Oct 27;12:744709.
- 459 2. Dalsgaard S, Thorsteinsson E, Trabjerg BB, Schullehner J, Plana-Ripoll O, Brikell I, et al.  
460 Incidence Rates and Cumulative Incidences of the Full Spectrum of Diagnosed Mental Disorders  
461 in Childhood and Adolescence. *JAMA Psychiatry*. 2020 Feb 1;77(2):155–64.
- 462 3. Willcutt EG. The prevalence of DSM-IV attention-deficit/hyperactivity disorder: a meta-analytic  
463 review. *Neurotherapeutics*. 2012 Jul;9(3):490–9.
- 464 4. Talantseva OI, Romanova RS, Shurdova EM, Dolgorukova TA, Sologub PS, Titova OS, et al.  
465 The global prevalence of autism spectrum disorder: A three-level meta-analysis. *Front Psychiatry*.  
466 2023 Feb 9;14:1071181.
- 467 5. Larsson H, Anckarsater H, Råstam M, Chang Z, Lichtenstein P. Childhood attention-deficit  
468 hyperactivity disorder as an extreme of a continuous trait: a quantitative genetic study of 8,500  
469 twin pairs. *J Child Psychol Psychiatry*. 2012 Jan;53(1):73–80.
- 470 6. Makransky G, Bilenberg N. Psychometric properties of the parent and teacher ADHD Rating  
471 Scale (ADHD-RS): measurement invariance across gender, age, and informant. *Assessment*.  
472 2014 Dec;21(6):694–705.
- 473 7. Constantino JN, Davis SA, Todd RD, Schindler MK, Gross MM, Brophy SL, et al. Validation of a  
474 brief quantitative measure of autistic traits: comparison of the social responsiveness scale with  
475 the autism diagnostic interview-revised. *J Autism Dev Disord*. 2003 Aug;33(4):427–33.
- 476 8. Cortés-Albornoz MC, García-Guáqueta DP, Velez-van-Meerbeke A, Talero-Gutiérrez C. Maternal  
477 Nutrition and Neurodevelopment: A Scoping Review. *Nutrients* [Internet]. 2021 Oct 8;13(10).  
478 Available from: <http://dx.doi.org/10.3390/nu13103530>
- 479 9. Fernandes DJ, Spring S, Roy AR, Qiu LR, Yee Y, Nieman BJ, et al. Exposure to maternal high-  
480 fat diet induces extensive changes in the brain of adult offspring. *Transl Psychiatry*. 2021 Mar  
481 2;11(1):149.
- 482 10. Giriko CÁ, Andreoli CA, Mennitti LV, Hosoume LF, Souto TDS, Silva AV da, et al. Delayed  
483 physical and neurobehavioral development and increased aggressive and depression-like  
484 behaviors in the rat offspring of dams fed a high-fat diet. *Int J Dev Neurosci*. 2013  
485 Dec;31(8):731–9.
- 486 11. Mitchell AJ, Khambadkone SG, Dunn G, Bagley J, Tamashiro K, Fair D, et al. Maternal  
487 Western-style diet reduces social engagement and increases idiosyncratic behavior in Japanese  
488 macaque offspring. *Brain Behav Immun* [Internet]. 2022 Jul 6; Available from:  
489 <http://dx.doi.org/10.1016/j.bbi.2022.07.004>
- 490 12. Prado E, Dewey K. Nutrition and Brain Development in Early Life [Internet]. *Prenatal and*  
491 *Childhood Nutrition*. 2015. p. 79–126. Available from: <http://dx.doi.org/10.1201/b18040-6>
- 492 13. Cordain L, Eaton SB, Sebastian A, Mann N, Lindeberg S, Watkins BA, et al. Origins and  
493 evolution of the Western diet: health implications for the 21st century. *Am J Clin Nutr*. 2005  
494 Feb;81(2):341–54.
- 495 14. Devarshi PP, Grant RW, Ikonte CJ, Hazels Mitmesser S. Maternal Omega-3 Nutrition, Placental  
496 Transfer and Fetal Brain Development in Gestational Diabetes and Preeclampsia. *Nutrients*  
497 [Internet]. 2019 May 18;11(5). Available from: <http://dx.doi.org/10.3390/nu11051107>
- 498 15. Taylor MR, Chuang C, Carrasco KD, Nagatomo S, Rucklidge JJ. Dietary and Micronutrient  
499 Treatments for Children with Neurodevelopment Disorders [Internet]. Vol. 5, *Current*  
500 *Developmental Disorders Reports*. 2018. p. 243–52. Available from:

- 501 <http://dx.doi.org/10.1007/s40474-018-0150-5>
- 502 16. Halliwell B, Cheah IK, Tang RMY. Ergothioneine - a diet-derived antioxidant with therapeutic  
503 potential. *FEBS Lett.* 2018 Oct;592(20):3357–66.
- 504 17. Prince N, Chu SH, Chen Y, Mendez KM, Hanson E, Green-Snyder L, et al. Phenotypically driven  
505 subgroups of ASD display distinct metabolomic profiles. *Brain Behav Immun.* 2023 Jul;111:21–9.
- 506 18. Poornimai Abirami GP, Radhakrishnan RK, Johnson E, Roshan SA, Yesudhas A, Parveen S, et  
507 al. The Regulation of Reactive Neuroblastosis, Neuroplasticity, and Nutraceuticals for Effective  
508 Management of Autism Spectrum Disorder. *Adv Neurobiol.* 2020;24:207–22.
- 509 19. Naveed S, Lakka T, Haapala EA. An Overview on the Associations between Health Behaviors  
510 and Brain Health in Children and Adolescents with Special Reference to Diet Quality [Internet].  
511 Vol. 17, *International Journal of Environmental Research and Public Health.* 2020. p. 953.  
512 Available from: <http://dx.doi.org/10.3390/ijerph17030953>
- 513 20. Basak S, Duttaroy AK. Maternal PUFAs, Placental Epigenetics, and Their Relevance to Fetal  
514 Growth and Brain Development. *Reprod Sci [Internet].* 2022 Jun 8; Available from:  
515 <http://dx.doi.org/10.1007/s43032-022-00989-w>
- 516 21. Pettersson E, Lichtenstein P, Larsson H, Song J, Attention Deficit/Hyperactivity Disorder Working  
517 Group of the iPSYCH-Broad-PGC Consortium, Autism Spectrum Disorder Working Group of the  
518 iPSYCH-Broad-PGC Consortium, Bipolar Disorder Working Group of the PGC, Eating Disorder  
519 Working Group of the PGC, Major Depressive Disorder Working Group of the PGC, Obsessive  
520 Compulsive Disorders and Tourette Syndrome Working Group of the PGC, Schizophrenia  
521 CLOZUK, Substance Use Disorder Working Group of the PGC, Agrawal A, et al. Genetic  
522 influences on eight psychiatric disorders based on family data of 4 408 646 full and half-siblings,  
523 and genetic data of 333 748 cases and controls - CORRIGENDUM. *Psychol Med.* 2019  
524 Jan;49(2):351.
- 525 22. Atladottir HO, Gyllenberg D, Langridge A, Sandin S, Hansen SN, Leonard H, et al. The  
526 increasing prevalence of reported diagnoses of childhood psychiatric disorders: a descriptive  
527 multinational comparison. *Eur Child Adolesc Psychiatry.* 2015 Feb;24(2):173–83.
- 528 23. Tran NQV, Miyake K. Neurodevelopmental Disorders and Environmental Toxicants: Epigenetics  
529 as an Underlying Mechanism. *Int J Genomics Proteomics [Internet].* 2017 [cited 2023 Jan  
530 7];2017. Available from: <https://www.ncbi.nlm.nih.gov/pmc/articles/PMC5439185/>
- 531 24. Keers R, Coleman JRI, Lester KJ, Roberts S, Breen G, Thastum M, et al. A Genome-Wide Test  
532 of the Differential Susceptibility Hypothesis Reveals a Genetic Predictor of Differential Response  
533 to Psychological Treatments for Child Anxiety Disorders. *Psychother Psychosom.* 2016 Apr  
534 5;85(3):146–58.
- 535 25. Faraone SV, Banaschewski T, Coghill D, Zheng Y, Biederman J, Bellgrove MA, et al. The World  
536 Federation of ADHD International Consensus Statement: 208 Evidence-based conclusions about  
537 the disorder. *Neurosci Biobehav Rev.* 2021 Sep;128:789–818.
- 538 26. Borge TC, Biele G, Papadopoulou E, Andersen LF, Jacka F, Eggesbø M, et al. The associations  
539 between maternal and child diet quality and child ADHD - findings from a large Norwegian  
540 pregnancy cohort study. *BMC Psychiatry.* 2021 Mar 8;21(1):139.
- 541 27. Howard AL, Robinson M, Smith GJ, Ambrosini GL, Piek JP, Oddy WH. ADHD is associated with  
542 a “Western” dietary pattern in adolescents. *J Atten Disord.* 2011 Jul;15(5):403–11.
- 543 28. Vecchione R, Wang S, Rando J, Chavarro JE, Croen LA, Fallin MD, et al. Maternal Dietary  
544 Patterns during Pregnancy and Child Autism-Related Traits: Results from Two US Cohorts.  
545 *Nutrients [Internet].* 2022 Jun 30;14(13). Available from: <http://dx.doi.org/10.3390/nu14132729>
- 546 29. Noerman S, Landberg R. Blood metabolite profiles linking dietary patterns with health-Toward  
547 precision nutrition. *J Intern Med.* 2023 Apr;293(4):408–32.

- 548 30. Faraone SV, Larsson H. Genetics of attention deficit hyperactivity disorder. *Mol Psychiatry*. 2019  
549 Apr;24(4):562–75.
- 550 31. Santos JX, Rasga C, Marques AR, Martiniano H, Asif M, Vilela J, et al. A Role for Gene-  
551 Environment Interactions in Autism Spectrum Disorder Is Supported by Variants in Genes  
552 Regulating the Effects of Exposure to Xenobiotics. *Front Neurosci*. 2022 May 19;16:862315.
- 553 32. Ma SL, Chen LH, Lee CC, Lai KYC, Hung SF, Tang CP, et al. Genetic Overlap Between  
554 Attention Deficit/Hyperactivity Disorder and Autism Spectrum Disorder in Gene. *Front Neurosci*.  
555 2021 Apr 27;15:649588.
- 556 33. Bateson P, Gluckman P. *Plasticity, Robustness, Development and Evolution*. Cambridge  
557 University Press; 2011. 166 p.
- 558 34. Gusev A, Lee SH, Trynka G, Finucane H, Vilhjálmsón BJ, Xu H, et al. Partitioning heritability of  
559 regulatory and cell-type-specific variants across 11 common diseases. *Am J Hum Genet*. 2014  
560 Nov 6;95(5):535–52.
- 561 35. Newby PK, Tucker KL. Empirically derived eating patterns using factor or cluster analysis: a  
562 review. *Nutr Rev*. 2004 May;62(5):177–203.
- 563 36. Zhao J, Li Z, Gao Q, Zhao H, Chen S, Huang L, et al. A review of statistical methods for dietary  
564 pattern analysis. *Nutr J*. 2021 Apr 19;20(1):37.
- 565 37. Cui Q, Xia Y, Wu Q, Chang Q, Niu K, Zhao Y. A meta-analysis of the reproducibility of food  
566 frequency questionnaires in nutritional epidemiological studies. *Int J Behav Nutr Phys Act*. 2021  
567 Jan 11;18(1):12.
- 568 38. Gürdeniz G, Ernst M, Rago D, Kim M, Courraud J, Stokholm J, et al. Neonatal metabolome of  
569 caesarean section and risk of childhood asthma. *Eur Respir J [Internet]*. 2022 Jun;59(6).  
570 Available from: <http://dx.doi.org/10.1183/13993003.02406-2021>
- 571 39. Savard C, Lemieux S, Weisnagel S, Fontaine-Bisson B, Gagnon C, Robitaille J, et al. Trimester-  
572 Specific Dietary Intakes in a Sample of French-Canadian Pregnant Women in Comparison with  
573 National Nutritional Guidelines [Internet]. Vol. 10, *Nutrients*. 2018. p. 768. Available from:  
574 <http://dx.doi.org/10.3390/nu10060768>
- 575 40. Urbonaite G, Knyzeliene A, Bunn FS, Smalskys A, Neniskyte U. The impact of maternal high-fat  
576 diet on offspring neurodevelopment [Internet]. Vol. 16, *Frontiers in Neuroscience*. 2022. Available  
577 from: <http://dx.doi.org/10.3389/fnins.2022.909762>
- 578 41. Pingault JB, O'Reilly PF, Schoeler T, Ploubidis GB, Rijdsdijk F, Dudbridge F. Using genetic data to  
579 strengthen causal inference in observational research. *Nat Rev Genet*. 2018 Sep;19(9):566–80.

580 **FIGURES**



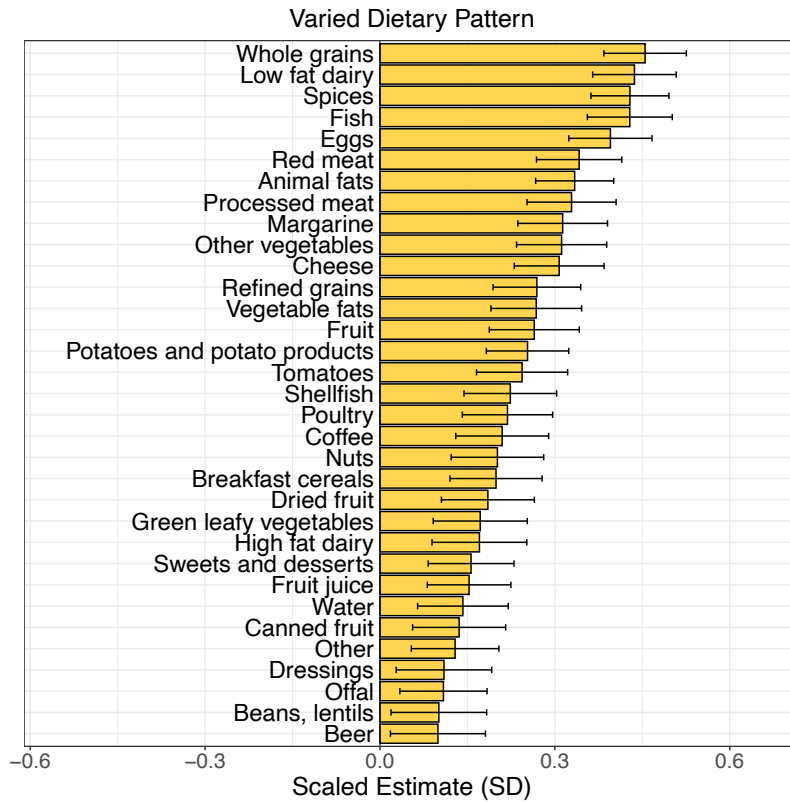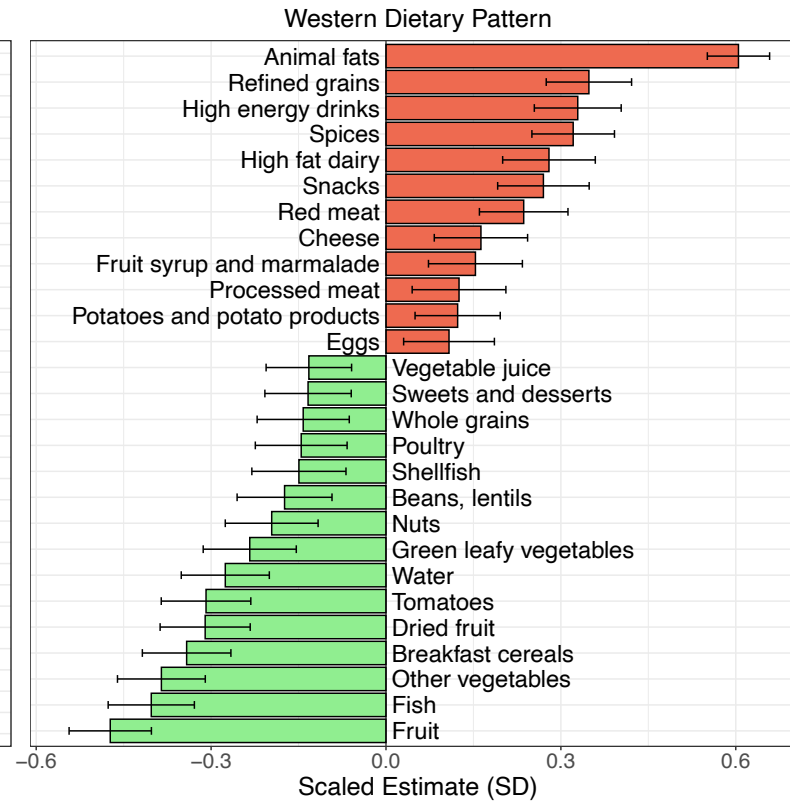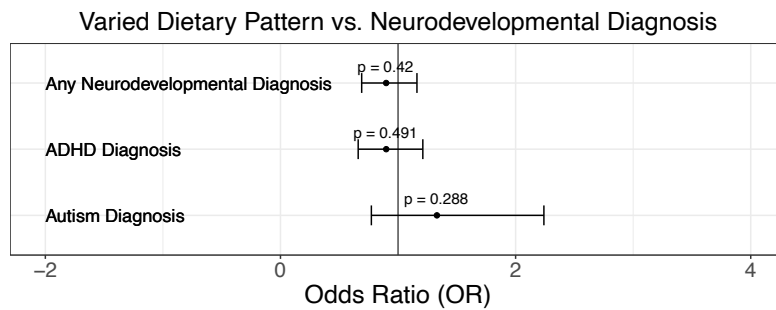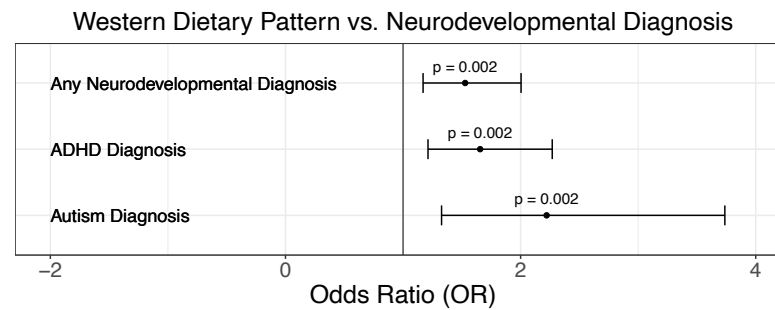

582 **Figure 1.** Figure showing the pregnancy Varied and Western dietary patterns derived from nutrient  
583 constituents (PC1 and PC2) and their associations with food groups. Multivariable analysis shows the  
584 Western dietary pattern is highly associated with any neurodevelopmental disorder diagnosis (OR 1.53,  
585 [1.17 - 2] ( $p = 0.002$ ), ADHD diagnosis 1.66 [1.21 - 2.27] ( $p = 0.002$ ), and autism diagnosis 2.22 [1.33 -  
586 3.74] ( $p = 0.002$ ), but the Varied dietary pattern is not significantly associated with neurodevelopmental  
587 disorders ( $p > 0.288$ ). Yellow represents positive associations with PC1, while red and green denote  
588 positive and negative associations with PC2, respectively.

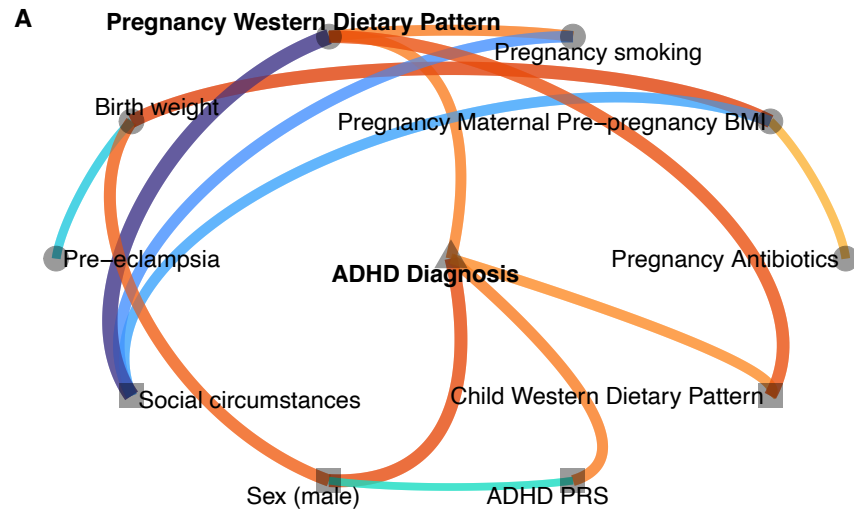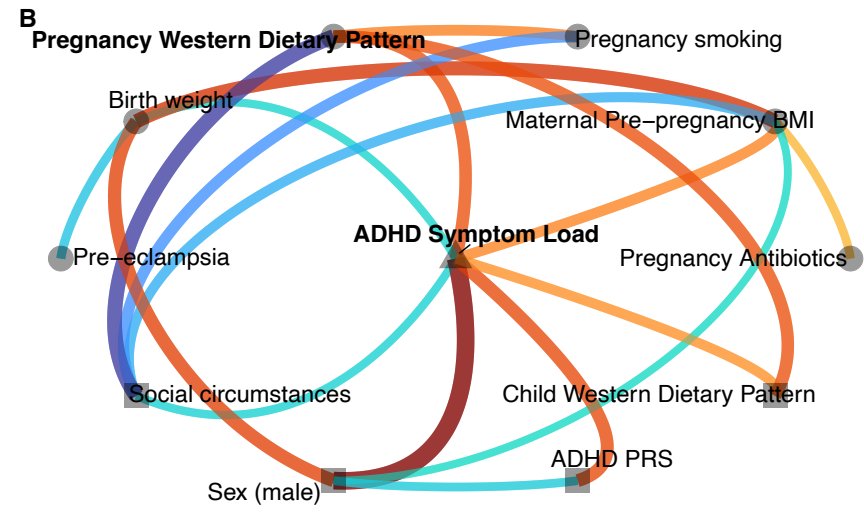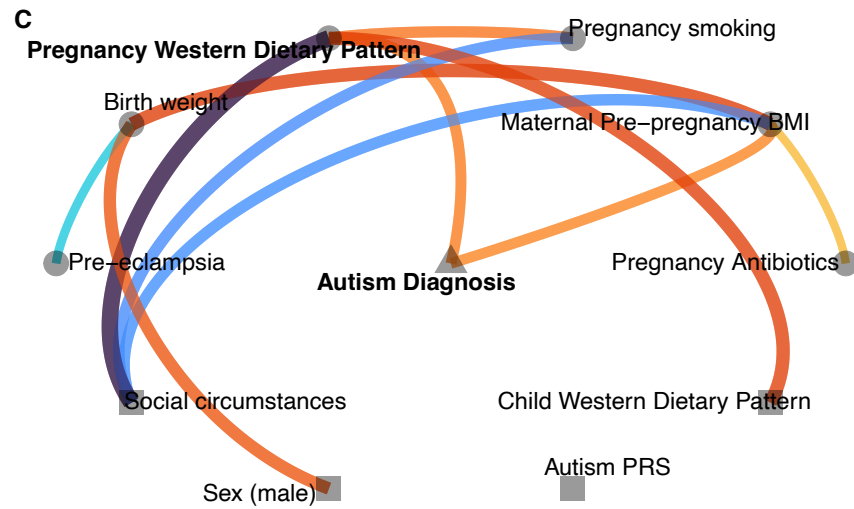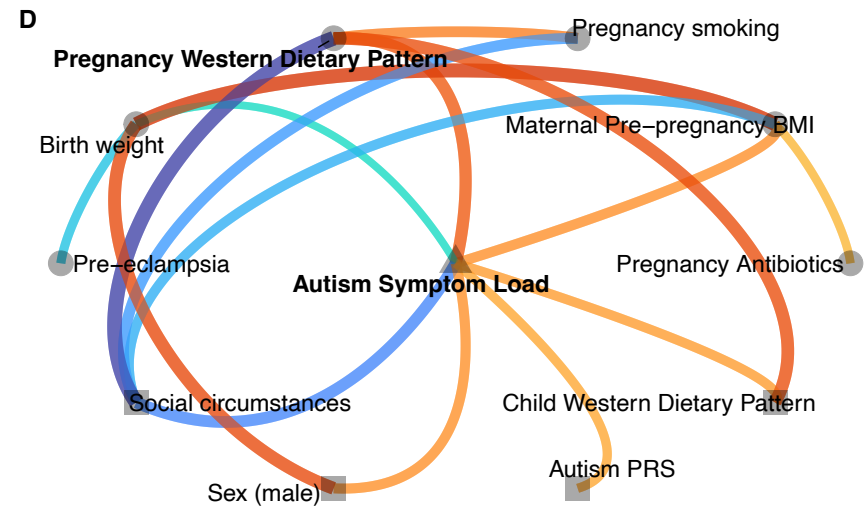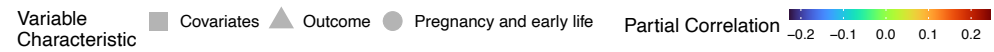

590 **Figure 2.** Graphical models illustrate associations (partial correlations  $p < 0.05$ ) between the Western  
591 dietary pattern during pregnancy, neurodevelopmental outcomes A: ADHD diagnosis, B: ADHD  
592 Symptom Load (ADHD-RS), C: Autism diagnosis, D: Autism Symptom Load (SRS-2), and model  
593 covariates. Models include child ADHD PRS (A&B) and autism PRS (C&D) as additional covariates.

# Metabolites Reflecting a Western Dietary Pattern and Their Mediation in Neurodevelopmental Disorders

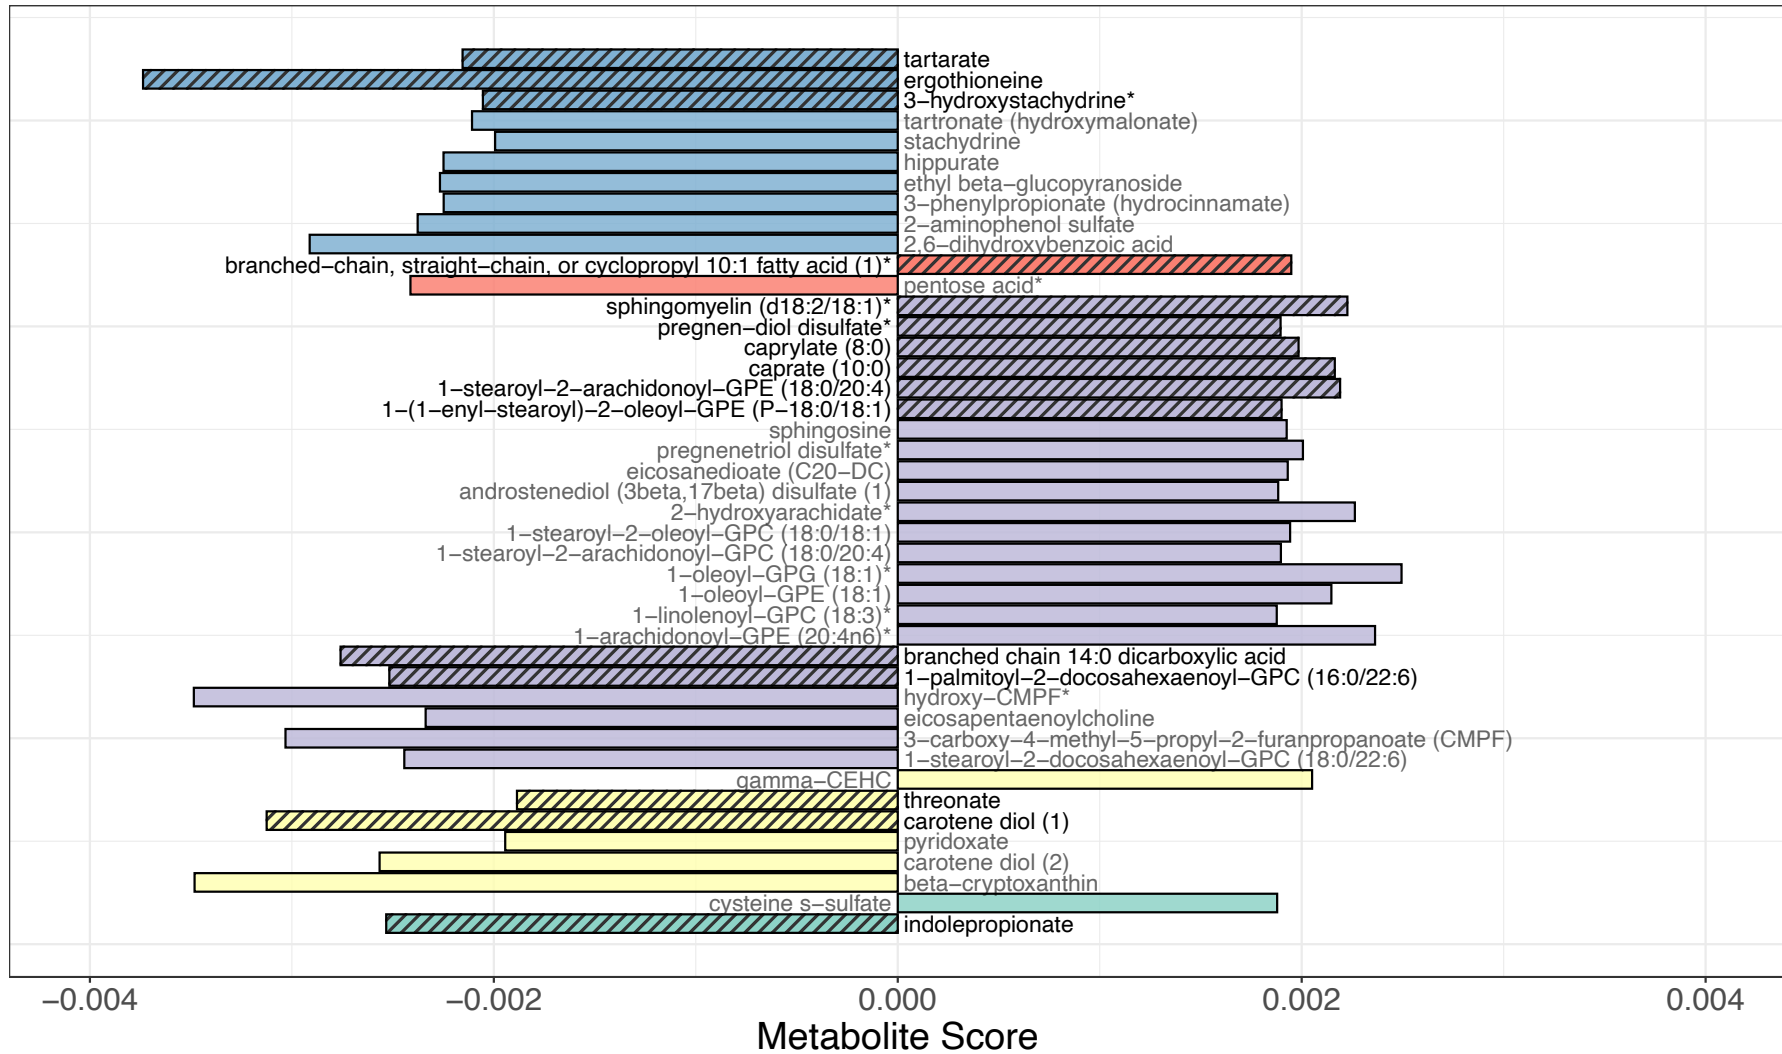

Metabolite Pathway: Amino Acid (teal), Cofactors and Vitamins (yellow), Lipid (purple), Partially Characterized Molecules (red), Xenobiotics (blue). Mediation: Yes (hatched), No (white).

595 **Figure 3.** The 43 metabolites, selected by the sparse partial least squares model, represent those  
596 associated with the Western dietary pattern during pregnancy at 24 weeks gestation in COPSAC2010.  
597 Positive metabolite scores indicate a positive association, while negative scores suggest an inverse  
598 relationship with this dietary pattern. A systematic backward elimination pinpointed 15 metabolites as  
599 mediators between the Western dietary pattern and any neurodevelopmental disorders. Notably,  
600 dietary-derived compounds, like ergothioneine, suggest potential protective roles, while certain lipid-  
601 associated metabolites hint at possible detrimental impacts on neurodevelopment.

# Western Dietary Pattern Associations with Neurodevelopmental Disorders

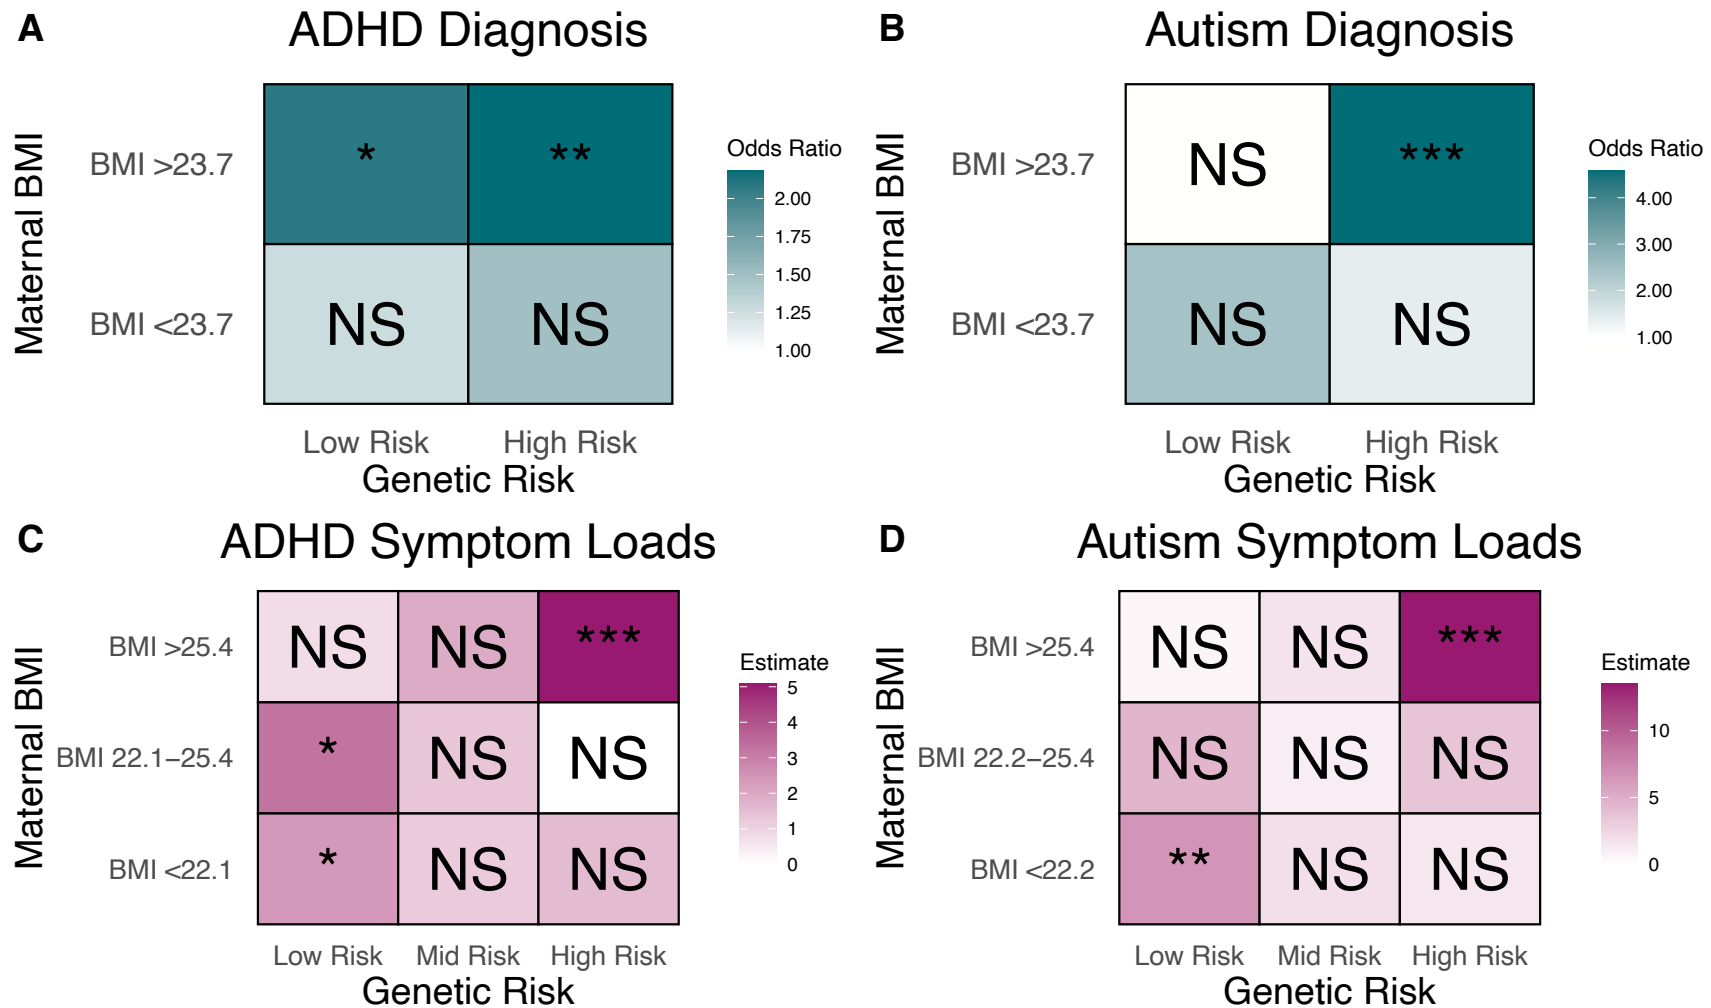

603 **Figure 4.** Modulation of the Western Dietary Pattern on Neurodevelopmental Outcomes in  
604 COPSAC2010 Cohort. Odds ratio estimates for ADHD (A) and autism diagnoses (B) based on  
605 interactions of the Western dietary pattern, maternal pre-pregnancy BMI (split at median value 23.7),  
606 and child's polygenic risk score (PRS) (median split) for ADHD and autism. Estimates for ADHD (C)  
607 and autism (D) symptom loads based on the Western dietary pattern, considering tertiles of maternal  
608 pre-pregnancy BMI and child's PRS for ADHD and autism. Odds ratios and estimates are in relation to  
609 a change of 1 SD of the Western dietary pattern. Stars represent significance levels: \* indicates  $p <$   
610 0.05, \*\* indicates  $p < 0.01$ , and \*\*\* indicates  $p < 0.001$ , with "NS" denoting non-significant results ( $p \geq$   
611 0.05). Further details, including the individual associations of these modulating factors, can be found in  
612 Table S11.



613 TABLES

| Western Dietary Pattern (PC2) Covariate Associations | Low Western Diet | Mid Western Diet | High Western Diet | p-value |
|------------------------------------------------------|------------------|------------------|-------------------|---------|
| n =                                                  | 170              | 169              | 169               |         |
| Male Sex (%)                                         | 77 (45.3)        | 98 (58.0)        | 91 (53.8)         | 0.058   |
| Social circumstances (mean (SD))                     | 0.34 (0.87)      | 0.06 (0.94)      | -0.41 (1.01)      | <0.001  |
| Maternal pre-pregnancy BMI (mean(SD))                | 24.12 (4.18)     | 24.41 (3.80)     | 25.36 (5.06)      | 0.026   |
| Smoking during pregnancy (%)                         | 5 ( 2.9)         | 7 ( 4.1)         | 26 (15.4)         | <0.001  |
| Gestational age in (days) (mean (SD))                | 279.18 (12.36)   | 279.62 (11.43)   | 279.14 (10.13)    | 0.911   |
| Birthweight (kg) (mean (SD))                         | 3.55 (0.56)      | 3.55 (0.53)      | 3.58 (0.53)       | 0.815   |
| Antibiotics during pregnancy (%)                     | 49 (29.0)        | 53 (31.4)        | 73 (43.2)         | 0.013   |
| Pre-eclampsia during pregnancy (%)                   | 5 ( 3.0)         | 9 ( 5.3)         | 8 ( 4.7)          | 0.539   |
| Child Western Dietary Pattern (mean (SD))            | -0.18 (0.89)     | -0.07 (1.01)     | 0.26 (1.08)       | <0.001  |
| n3-LCPUFA Pregnancy RCT (%)                          | 82 (48.2)        | 88 (52.1)        | 88 (52.1)         | 0.717   |
| High dose Vitamin D Pregnancy RCT (%)                | 70 (51.1)        | 66 (47.1)        | 64 (45.4)         | 0.622   |
| Total energy consumption (FFQ) (mean (SD))           | 9131 (1982)      | 8497 (1968)      | 9502 (2545)       | <0.001  |
| Maternal ADHD PRS (mean (SD))                        | -0.12 (1.00)     | -0.05 (0.97)     | 0.09 (1.04)       | 0.208   |
| Child ADHD PRS (mean (SD))                           | -0.17 (1.06)     | -0.03 (1.00)     | 0.11 (0.99)       | 0.060   |
| Child Autism PRS (mean (SD))                         | -0.01 (1.02)     | -0.05 (1.05)     | -0.01 (1.04)      | 0.921   |

614

615 **Table 1.** Model covariates stratified by low, middle and high (tertiles) for the pregnancy Western dietary  
 616 pattern, in children who were clinically assessed for neurodevelopmental disorders.

617 **Footnote:**

618 † PC2: Principal Component 2, BMI: Body Mass Index, RCT: Randomised Controlled Trial, FFQ: Food Frequency Questionnaire,

619 PRS: Polygenic Risk Score.

|                                           | <b>Univariate Model</b>            | <b>Multivariable Model</b>         |
|-------------------------------------------|------------------------------------|------------------------------------|
| <b>Neurodevelopmental Diagnosis</b>       | <b>Odds Ratio [95% CI] p-value</b> | <b>Odds Ratio [95% CI] p-value</b> |
| Any Neurodevelopmental Disorder Diagnosis | 1.66 [1.31 - 2.11] (p < 0.001)     | 1.53 [1.17 - 2.00] (p = 0.002)     |
| ADHD Diagnosis                            | 1.84 [1.42 - 2.41] (p < 0.001)     | 1.66 [1.21 - 2.27] (p = 0.002)     |
| Autism Diagnosis                          | 2.38 [1.50 - 3.79] (p < 0.001)     | 2.22 [1.33 - 3.74] (p = 0.002)     |
| <b>Neurodevelopmental Symptom Loads</b>   | <b>Estimate [95% CI] p-value</b>   | <b>Estimate [95% CI] p-value</b>   |
| ADHD Symptom Load (ADHD-RS)               | 2.26 [1.53 - 2.98] (p < 0.001)     | 1.73 [0.98 - 2.49] (p < 0.001)     |
| Autism Symptom Load (SRS-2)               | 4.37 [2.92 - 5.81] (p < 0.001)     | 3.21 [1.69 - 4.74] (p < 0.001)     |

620

621 **Table 2.** Regression analysis of the Western dietary pattern during pregnancy and neurodevelopmental  
622 outcomes. Odds ratios and estimates are interpreted as the association of 1 standard deviation of the  
623 pregnancy Western dietary pattern. **Model A:** Univariate analysis. **Model B:** Multivariable analysis  
624 (multivariable model adjusted for pre-pregnancy maternal BMI, social circumstances (household  
625 income, maternal education level, and maternal age), child sex, birth weight, gestational age, pregnancy  
626 smoking/antibiotic use, pre-eclampsia and a child Western dietary pattern at 10-years of age).

## 627 **METHODS**

### 628 **Study Design**

629 The primary analysis of our research was conducted within the Copenhagen Prospective Studies on  
630 Asthma in Childhood (COPSAC2010) mother-child cohort, supplemented by validation analyses in  
631 three independent mother-child cohorts: the Danish National Birth Cohort (DNBC), the Vitamin D  
632 Antenatal Asthma Reduction Trial (VDAART), and COPSAC2000. The COPSAC2010 cohort includes  
633 700 mother-child pairs with extensive phenotyping from 14 clinical visits and exposure assessments  
634 since birth, including infants born within a gestational range of 30 to 42 weeks, thus covering both  
635 preterm and full-term births (42). Outcome data for this study was derived from the COpenhagen  
636 Prospective Study on Neuro-PSYCHiatric Development (COPSYCH) study (43) nested within the  
637 COPSAC2010 mother-child cohort, at age 10 years.

638 In validation analysis, we utilised the DNBC, a large mother-child cohort that recruited over 100,000  
639 pregnant mothers from early gestation, approximately 35% of pregnancies during the recruitment  
640 period, to validate our findings of the food frequency questionnaire derived dietary pattern (44,45).  
641 Furthermore, we used the large independent US-based VDAART mother-child cohort (NCT00920621)  
642 ( $n=656$ ) (46), to validate our blood metabolome modelling (47), and further validated our findings in the  
643 COPSAC2000 cohort ( $n=348$ ), using metabolic profiles from neonatal dried blood spots (DBS) (48).

### 644 **The COPSYCH 10-year visit**

645 The COPSYCH study comprised a 2-day clinical visit that focused on neurodevelopment, reflected by  
646 neurocognition and psychopathology (43). Clinical examinations were carried out between January  
647 2019 and December 2021.

648 We used both the International Classification of Disorders 10th Revision (ICD-10) of Mental and  
649 Behavioural Disorders: Clinical descriptions and diagnostic guidelines and Diagnostic and Statistical  
650 Manual of Mental Disorders, Fifth Edition (DSM-5) criteria for research diagnoses based on clinical  
651 information from the 10-year visit. ADHD ICD-10 diagnostic codes assigned at the COPSYCH visit  
652 included: DF90.0 (*Disturbance of activity and attention*), DF90.8 (*Other hyperkinetic disorders*) and  
653 DF98.8C (*Attention deficit disorder without hyperactivity*). For secondary analysis, we further specified

654 *ADHD combined presentation* (DSM-5) (fulfilling ICD-10 DF90.0 or DF90.8) and *ADHD predominantly*  
655 *inattentive presentation* (DSM-5) (fulfilling ICD-10 DF98.8C). Autism ICD-10 diagnostic codes assigned  
656 were: DF84.0 (*Childhood autism*), DF84.5 (*Asperger's syndrome*) and DF84.8 (*Other pervasive*  
657 *developmental disorders*). For our analysis, we also included additional neurodevelopmental disorder  
658 codes under the umbrella of 'any neurodevelopmental disorder', including DF95.1 (*chronic motor or*  
659 *vocal tic disorder*), DF95.2 (*Tourette's syndrome*), DF88 (*Other disorders of psychological*  
660 *development*), and DF89 (*Unspecified disorder of psychological development*), in addition to ADHD and  
661 autism as previously described.

662 The ADHD Rating Scale (ADHD-RS) questionnaire was completed by parents to assess the severity of  
663 inattentive and impulsive-hyperactive symptoms (6), and the Social Responsiveness Scale-2 (SRS-2)  
664 was used to assess the severity of autism traits in the whole cohort (7). Symptom loads are derived  
665 from the total scores of the ADHD-RS (Q1-Q18) and SRS-2 questionnaires. Subscales for ADHD-RS  
666 and SRS-2 are utilised in subanalysis. In addition, at 6 years, we evaluated hyperactivity/inattention  
667 problems using the subscale from the Strengths and Difficulties Questionnaire (SDQ), which scores  
668 range from 0 to 10 (49,50).

669 The Kiddie Schedule for Affective Disorders and Schizophrenia for School-Age Children Present and  
670 Lifetime Version (K-SADS-PL) (25) was used to assess current and lifetime psychopathology through  
671 a general screening interview and supplementary interview for relevant disorders (51). All K-SADS-PL  
672 interviews were conducted by a trained clinician. If certain thresholds are reached, a supplementary  
673 interview is conducted to assign relevant diagnoses based on all available information. Consensus  
674 diagnoses were made between senior researcher and psychologist with specialty in child and  
675 adolescent psychiatry (JRMJ) and at least two examiners according to both the Diagnostic and  
676 Statistical Manual of Mental Disorders, Fifth Edition (52) and the International Classification of Disorders  
677 10th Revision (ICD-10) of Mental and Behavioural Disorders: Clinical descriptions and diagnostic  
678 guidelines (53). Diagnostic classification was further validated by a professor in child and adolescent  
679 psychiatry (NB). An estimation of interrater reliability on the symptom level was performed based on  
680 video recordings of 10 participants with JRJM as the gold standard. The overall agreement, including  
681 both currently present and not present symptoms, was 99.48% (95%CI 99.25-99.66). The agreement  
682 specifically on present symptoms was 88.48% (95%CI 82.60-92.92).

## 683 **Food Frequency Questionnaires and Pregnancy Dietary Patterns**

684 At 24 weeks of gestation, upon their recruitment to the COPSAC2010 cohort, mothers were asked to  
685 complete a validated semi-quantitative FFQ with a one-month recall period, encompassing 360 items  
686 detailing their dietary intake over the previous month. Mothers in COPSAC2010 and DNBC were  
687 subsequently excluded from the analysis for reporting unrealistic energy intakes, either below 4,200  
688 kJ/day or exceeding 16,700 kJ/day. Utilised in both the DNBC validation cohort and the COPSAC2010  
689 cohort, this FFQ has been validated in both a group of younger women (54) and for pregnant women  
690 (55,56). The timing of FFQ completion at week 25 in the DNBC cohort, closely aligned with the  
691 COPSAC2010 cohort's at 24 weeks, and thus facilitates the examination of dietary pattern associations  
692 on neurodevelopmental outcomes (45). Mothers reported their intake of foods with natural units like  
693 apples, while for items without natural units, such as lasagne, they indicated frequency of consumption.  
694 Nutrient intakes were estimated using standard portion sizes and recipes, with frequency categories  
695 converted to daily intake. Intakes of various food items were calculated based on standard portion size  
696 assumptions, measured in grams per day. Nutrient constituents were then determined using the  
697 National Food Institute's Food Composition Databank, version 7 (57). Nutrient constituents were  
698 selected for analysis due to its association with physiological and metabolic functions, which provides  
699 a perspective on biological mechanisms applicable across various populations. During the COPSAC  
700 clinical assessment at the age of 10, we collected data on the dietary habits of children. The FFQ,  
701 encompassing 145 distinct food items, aimed to capture the consistent dietary habits of children. It has  
702 been previously validated for use among adolescents aged 12-15 in the DNBC study (58). Intakes of  
703 food groups and nutrient components were measured using the same method as the pregnancy  
704 questionnaire mentioned above.

705 In COPSAC2010, principal component analysis (PCA) was used to identify maternal dietary patterns  
706 based on the calculated estimates of energy, macronutrient, and micronutrient intake in 613 mothers.  
707 In the DNBC cohort, dietary pattern validation was achieved using the principal component model  
708 originally trained in COPSAC2010 data, ensuring the identification of directly comparable dietary  
709 patterns across the two cohorts. To validate our methodology, we also assessed for associations of a  
710 comparable dietary pattern trained within the DNBC. In COPSAC2010, the derived dietary patterns

711 were associated with estimates for food groups for interpretability. The sum totals of nutrient  
712 constituents were excluded to avoid redundancy in the PCA.

713 In the VDAART cohort, mothers were asked to complete a semi-quantitative food frequency  
714 questionnaire (FFQ) during the clinical visit corresponding to when the blood metabolome samples were  
715 taken: 10-18 weeks and 32-38 weeks gestation (59). The FFQ captured the average weekly  
716 consumption of each food item(s) over the past year using the following ordinal categories: "Less than  
717 once per week" as 0, "Once per week" as 1, "2-4 times per week" as 2, "Nearly daily or daily" as 3, and  
718 "Twice or more per day" as 4.

### 719 **DNBC, VDAART and COPSAC2000 Neurodevelopmental Outcomes**

720 In the DNBC cohort, neurodevelopmental outcomes were derived from National registers. Specifically,  
721 outcome data was extracted from the Danish National Patient Register (60), the Danish Psychiatric  
722 Central Research Register (61), the Danish National Prescription Registry (62). Children were defined  
723 as having an ADHD diagnosis if they had received an ADHD diagnosis or redeemed a prescription for  
724 ADHD medication after reaching 3 years of age. The diagnoses were obtained from the Danish National  
725 Patient Register and Danish Psychiatric Central Research Register. These were recorded according to  
726 the International Classification of Diseases Tenth revision (ICD-10) and we defined a case by using the  
727 diagnostic codes from F90.x. Prescriptions of ADHD medication were identified from the Danish  
728 National Prescription Registry using the Anatomical Therapeutic Chemical Classification codes for  
729 methylphenidate (N06BA04), modafinil (N06BA07), and atomoxetine (N06BA09). Similarly, autism  
730 diagnosis was defined as children aged 2 years or older with a diagnosis code of ICD-10: F84.0, F84.1,  
731 F84.5, F84.8, or F84.9, derived from the Danish National Patient Register, or the Danish Psychiatric  
732 Central Research Register. Any neurodevelopmental diagnosis disorder was defined as having an  
733 ADHD, or autism diagnosis, as defined above, or any of the following ICD-10 codes: F80-83 (other  
734 developmental disorder), F84 (Pervasive developmental disorders), (F88-89 (other/unspecified  
735 disorders of psychological development), F95 (tic disorders), F98·8 (ADHD – inattentive type) and F20-  
736 F29 (schizophrenia spectrum disorder). In addition, at 7 years, we evaluated hyperactivity/inattention  
737 problems using the subscale from the SDQ, which scores range from 0 to 10 (49,50).

738 Parents of VDAART children at the six-, seven- and eight-year follow-up visits were asked if their child  
739 “had ever received a physician diagnosis of ADD or ADHD” or “had ever received a physician diagnosis  
740 of autism”. Our main analysis was on children at the age of 6. Further for an analysis of robustness we  
741 assessed associations on whether children had ever had a diagnosis of ADD/ADHD or autism up to the  
742 age of eight.

743 In COPSAC2000, participants were asked to complete the Adult ADHD Self-Report Scale v1.1 (ASRS)  
744 at the 18-year clinical cohort visit (63). The ASRS has been validated and demonstrated good reliability  
745 and validity in screening for ADHD in adults. In our analysis, participants received a score of 1 for any  
746 question that deemed a symptom of ADHD (such that total scores could range from 0 to 18) (64). As a  
747 subanalysis we stratified inattention-based questions (Q1-Q4, Q7-Q11) and hyperactivity-impulsivity  
748 questions (Q5-Q6, Q12-Q18).

#### 749 **Blood Metabolome**

750 Untargeted plasma metabolomics data was collected from mothers at mid-pregnancy (24 weeks  
751 gestation) and one week postpartum, and from children at ages 6 months, 18 months, and 6 years in  
752 the COPSAC2010 cohort. A blood sample was collected using an EDTA tube during the visit to the  
753 research clinic site, then centrifuged for 10 minutes at 4000 rpm to extract the plasma. The supernatant  
754 was secured and stored at  $-80^{\circ}\text{C}$  for future analysis. The untargeted metabolomic analysis of the  
755 plasma samples for both COPSAC2010 and the VDAART cohorts were carried out by Metabolon, Inc.  
756 (NC, USA).

757 For sample preparation, we employed the MicroLab STAR® system from Hamilton Company, which is  
758 an automated process. Each sample was enhanced with recovery standards to ensure quality control  
759 (QC) before metabolites were extracted using methanol. This extraction process involved vigorous  
760 shaking for 2 minutes using a Glen Mills GenoGrinder 2000, followed by centrifugation, to precipitate  
761 proteins. The extract was then divided into four aliquots for further analysis on four different LC-MS/MS  
762 platforms. The aliquots were dried using a TurboVap® (Zymark) to evaporate the organic solvent, then  
763 stored under nitrogen overnight prior to LC-MS/MS preparation.

764 The analysis through LC-MS/MS was conducted using an ACQUITY Ultra-Performance Liquid  
765 Chromatography (UPLC) system by Waters, Milford, USA, coupled with a Q Exactive™ Hybrid

766 Quadrupole-Orbitrap™ mass spectrometer, which includes a heated electrospray ionisation (HESI-II)  
767 source, provided by ThermoFisher Scientific, Waltham, Massachusetts, USA. We prepared the sample  
768 extracts in solvent mixes specifically chosen for each of the four LC methods applied: two methods  
769 were reverse phase UPLC-ESI(+) MS/MS for analysing both hydrophilic and hydrophobic molecules;  
770 another was a reverse phase UPLC-(-) MS/MS; and the last was HILIC/UPLC-(-) MS/MS. The mass  
771 spectrometry analysis alternated between full scan MS and data-dependent MS<sub>n</sub> scans with dynamic  
772 exclusion, covering a scan range from 70 to 1000 m/z for both ion modes.

773 In terms of data collection and quality control, the raw data was subjected to extraction, peak  
774 identification and followed by QC procedures. The semi-quantification of samples was based on the  
775 area-under-the-curve method. Further details are discussed in our previously published work (65).

776 Data preprocessing was done by excluding metabolites with >33% missingness. Remaining missing  
777 data was imputed using random forest imputation (missForest package, v1.5) (66) and the metabolome  
778 data was log-transformed, centred and scaled, prior to analysis. A pattern of missingness identified in  
779 the metabolite subset (0.11 [0.02-0.20], p=0.021) suggested under detection in the Western dietary  
780 pattern, with no corresponding bias for neurodevelopmental outcomes or across the full metabolome  
781 (*Table S13*), reinforcing the validity of our imputation approach. The metabolome data for mothers at  
782 mid-pregnancy (24 weeks gestation) had a total of 760 annotated metabolites for analysis. Of these,  
783 744 metabolites overlapped between the 24-week gestation period and one week postpartum, 516  
784 metabolites overlapped with 6-month data, 707 metabolites overlapped with 18-month data and 540  
785 metabolites overlapped with 6-year data.

786 We used two VDAART blood metabolome pregnancy time points (10-18 weeks and 32-38 weeks),  
787 measured on the same platform as the COPSAC2010 samples, to replicate our findings for ADHD. The  
788 24-week pregnancy time point in COPSAC2010 was compared with those for early pregnancy (10-18  
789 weeks gestation) and late pregnancy (32-38 weeks gestation) in VDAART, identifying 640 and 689  
790 overlapping metabolites, respectively. We further predicted metabolite scores for the VDAART children,  
791 with 523 overlapping metabolites at 1 year, 530 at 3 years, and 677 overlapping metabolites at 6 years.  
792 The metabolite scores were predicted using the model trained on COPSAC2010 data; applied to log-  
793 transformed, centred and scaled VDAART data. The metabolite score predictions were subsequently  
794 scaled, and thus results should be interpreted as per SD change in the given population.



## 795 **Neonatal Dried Blood Spot samples**

796 DBS samples from COPSAC2010 ( $n=677$ ) and COPSAC2000 ( $n=387$ ) were respectively collected at  
797 age 2-3 days and 1-12 days after birth, and stored at  $-20^{\circ}\text{C}$  at the Danish National Biobank until  
798 analysis. Metabolic profiles of the DBS samples were acquired by liquid chromatography mass  
799 spectrometry (LC-MS). Data preprocessing was executed using both XCMS and MZmine, with the  
800 quality assessed based on the distribution of pooled samples (38). Metabolite extraction from DBS  
801 samples, a 3.2mm punch in diameter, was conducted using a Microlab STAR automated liquid handler  
802 from Hamilton Bonaduz AG, Bonaduz, Switzerland. These samples were extracted onto 96-well plates  
803 in batches with 100  $\mu\text{L}$  of 80% methanol, specifically designed for analytical processes. Subsequently,  
804 75  $\mu\text{L}$  of the supernatants were shifted to fresh plates, air-dried under a nitrogen atmosphere, and  
805 reconstituted in 75  $\mu\text{L}$  of 2.5% methanol. Before injection, 65  $\mu\text{L}$  was transferred onto the final plates.  
806 For the analysis, samples from both COPSAC2000 and COPSAC2010 were divided, with the former  
807 distributed across six batches and the latter across ten. Each batch or plate comprised eight water  
808 blanks, an internal standard mix, four external controls, three paper blanks, four pooled samples, two  
809 diluted pools, and 74 cohort samples. All extractions utilised LC-MS grade solvents provided by Thermo  
810 Fisher Scientific, Waltham, MA, USA. An addition of 24 isotope-labelled internal standards,  
811 encompassing amino acids and acylcarnitines, was made to the extraction solvents. These standards,  
812 consistent in concentration across samples, were employed to ensure quality and evaluate the efficacy  
813 of batch correction and normalisation that followed. To further gauge the variability in sample  
814 preparation, acquisition, and preprocessing, quality control pooled samples (PSs) were periodically  
815 assessed throughout the analysis run. Metabolic profiles were generated using a high-resolution  
816 Thermo Scientific Q-Exactive Orbitrap mass spectrometer, linked to a Dionex Ultimate 3000 UPLC.  
817 This complex procedure involved a series of specific injection, gradient operation, and parameters for  
818 mass spectrometric analysis. Preprocessing of the acquired data involved the use of software like  
819 XCMS, MZmine, and MSconvert, with specific protocols established for peak detection, alignment,  
820 deconvolution, and filtering. Ensuring data quality was paramount, and this was maintained through the  
821 use of internal standards and a series of checks, including principal component analysis (PCA) to  
822 confirm the clustering of pooled samples. For a more detailed insight into the equipment settings, data  
823 preprocessing steps, and quality controls, refer to the specific sections on mass spectrometry settings,  
824 LC-MS/MS data preprocessing, and quality control in the supplementary information. Further in-depth

825 description of sample preparation, LC-MS metabolic profiling, and data pre-processing for both cohorts  
826 can be found in previous work (38). There were 2313 features detected in COPSAC2010 and 2363  
827 features in COPSAC2000. As the majority of features were unnamed, we merged both datasets using  
828 an inexact matching criterion (mass  $\pm 0.01$ , retention time  $\pm 0.1$ ) using the fuzzyjoin R package (v0.1.6)  
829 (67) and subsequently found 1253 overlapping metabolites between cohorts. For further robustness,  
830 we applied a further filter, only retaining features that had a cross-correlation between cohorts of  $>0.4$ ,  
831 ending with 951 overlapping features between cohorts.

### 832 **Information on Covariates**

833 In our multivariable analysis, we included the following covariates for COPSAC2010: pre-pregnancy  
834 maternal BMI, social circumstances (the first principal component of household income, maternal  
835 education level, and maternal age at birth), child sex, birth weight, gestational age, smoking during  
836 pregnancy, antibiotic use during pregnancy, pre-eclampsia and a child Western dietary pattern,  
837 assessed by a FFQ from children at 10 years old. Missing covariate data was imputed, based on the  
838 available covariate information available using the imputePCA function with one component from the  
839 missMDA (v1.18) R package.

840 Additionally, we conducted sensitivity analysis in COPSAC2010 to explore the influence of the following  
841 variables: the results of two randomised controlled trials conducted within the COPSAC2010 cohort  
842 (n3-LCPUFA supplementation and high-dose vitamin D during pregnancy) (42), total energy intake  
843 derived from the maternal FFQ, maternal ADHD genetic risk, intake of prenatal supplements, and  
844 genomic PCs. Specifically, adjustment of intake of prenatal supplements was conducted by adjusting  
845 for the first seven principal components (explaining 78.6% of the total variance) of the estimated intakes  
846 of 31 vitamins, minerals and fatty acids, recorded at the time of the 24 week FFQ, and whether prenatal  
847 supplements were taken (yes (94.1%) or no (5.9%)). Missing data were imputed using the same  
848 approach described above from the missMDA R package.

849 Covariates used in multivariable analysis for the DNBC included pre-pregnancy maternal BMI, parental  
850 social group (high, medium, skilled, student, unskilled, unemployed), maternal age, child sex, birth  
851 weight, gestational age and smoking during pregnancy. Missing covariate data were imputed based on

852 existing covariates using multiple imputation as implemented by the PROC MI procedure in SAS  
853 (version 9.1, SAS Institute, Cary, NC).

854 Covariates used in multivariable analysis for the VDAART included pre-pregnancy maternal BMI, social  
855 circumstances (the first principal component of household income, maternal education level, and  
856 maternal age at birth), child sex, birth weight, gestational age, smoking during pregnancy, pre-  
857 eclampsia, and race. Missing covariate data was imputed, based on the available covariate information  
858 using the imputePCA function with one component from the missMDA (v1.18) R package.

859 Covariates used in multivariable analysis for COPSAC2000 included social circumstances (the first  
860 principal component of household income, maternal education level, and maternal age at birth), child  
861 sex, birth weight, antibiotics during pregnancy and smoking during pregnancy.

862 The child sex variable in COPSAC2010, the DNBC, COPSAC2000 and VDAART was interpreted as  
863 sex assigned at birth.

#### 864 **Polygenic Risk Scores**

865 Maternal and child genotypes in the COPSAC2010 cohort were analysed using the Illumina Infinium  
866 HumanOmniExpressExome BeadChip. To calculate PRS for ADHD and autism, we used data from  
867 genome-wide association meta-analyses of diagnosed ADHD cases ( $n=20,183$ ) and controls  
868 ( $n=35,191$ ) (68) and autism cases ( $n=18,381$ ) and controls ( $n=27,969$ ) (69).

869 The software package Polygenic risk score continuous shrinkage (CS) was used for PRS construction  
870 through regularising SNP effects using a shrinkage prior (70). PRS-CS uses a linkage disequilibrium  
871 (LD) reference panel constructed via European ancestry samples from the 1000 genomes project. We  
872 used the automatic estimation of the polygenicity parameter ( $\phi$ ). Subsequent to SNP effect adjustment  
873 with PRS-CS, we used the software PLINK2 (71) to aggregate SNP effects into PRSs for each  
874 individual. The scores were scaled to mean 0 and SD 1 for each phenotype.

#### 875 **Statistical Analysis**

876 Logistic regression models were used to determine the associations of maternal dietary patterns on  
877 neurodevelopmental disorders, and linear regression models were used to assess the associations of

878 maternal dietary patterns on parentally reported symptom loads for ADHD and autism. All multivariable  
879 models were adjusted for the previously mentioned covariates. Dietary principal components and  
880 metabolite scores were scaled to enhanced interpretation (Odds ratios and estimates are interpreted  
881 as per SD change). We used linear interaction models to examine the modulating effects of genetics,  
882 child sex and maternal BMI on neurodevelopmental outcomes. All interaction models were multivariable  
883 (see `Information on covariates`), additionally including genetic risk (see `Polygenic Risk Scores`). We  
884 excluded five individuals from the analysis. Specifically, we removed the second twin from twin pairs  
885 since the exposure of interest was not independent. However, non-twin sibling pairs were retained in  
886 the analysis, as the exposure and outcome measures were independently assessed for each sibling.

887 We used Gaussian graphical network models via the framework described by Williams and Rast (72).  
888 Gaussian graphical models show the non-zero relationships (95% CI) between the dietary pattern,  
889 neurodevelopmental outcomes and model covariates, controlling for the linear effects of all covariates  
890 expressed as partial correlations. We integrated gestational age and birthweight to refine our Gaussian  
891 graphical network models, as these variables are highly collinear (73). From these models, significant  
892 associations in the resulting precision matrices were visualised as interconnected network diagrams  
893 utilising the ggraph (v2.1.0), igraph (v1.2.11), and qgraph (v1.9.2) libraries in R.

894 We used the caret package (v6.0.90) to establish Western dietary pattern metabolite scores (WDP-  
895 MS), via sparse partial least squares regression on the COPSAC2010 metabolomics datasets, with the  
896 pregnancy Western dietary pattern as the response. Individual models were created for predicting  
897 WDP-MS at other timepoints, using the subset of overlapping metabolites (See `Blood Metabolome`).  
898 To improve interpretability and reduce the risk of overfitting, we used single-component models,  
899 applying cross-validated predictions (repeated cv, number of segments=5, repeats=10). After reviewing  
900 models that varied in sparsity (incremented by 0.1 from 0 to 1), we opted for the model with the lowest  
901 root-mean-standard error for cross-validation (RMSECV) as our selection criteria. For external  
902 validation between COPSAC2010 and VDAART, we adjusted our model parameters to balance against  
903 overfitting whilst ensuring optimal performance, leading to the selection of models that were within +0.01  
904 RMSECV of the best-performing model. We similarly trained a sPLS model in the COPSAC2010 cohort  
905 on the Western dietary pattern from DBS metabolic profiles that overlapped with the COPSAC2000  
906 cohort.

907 To elucidate the role of metabolites as potential biomarkers or mediators in the association between a  
908 Western dietary pattern and neurodevelopmental disorders, we employed a systematic backward  
909 elimination strategy. This approach was designed to iteratively exclude metabolites, aiming to identify  
910 those with the most profound mediating influence on the outcome. We employed 10,000 iterations for  
911 each step of this elimination. We used two linear models: one linking a composite metabolite score to  
912 the Western dietary pattern and covariates, and another assessing its mediating role between dietary  
913 patterns and neurodevelopmental outcome. This causal mediation analysis was conducted with the  
914 mediation package in R (v4.5.0).

915 When comparing the associations of the mother and child WDP-MS in logistic regression, we utilised  
916 the imputePCA function from the missMDA package (v1.18) (74) to impute missing data with one  
917 component (12.5% in COPSAC2010). This was done using the available metabolite scores as a  
918 reference. Linear mixed models with variable slopes and intercepts were applied to the WDP-MS data,  
919 integrating gestational age alongside chronological age. The slopes and intercepts were treated as  
920 random effects, allowing for modelling of the longitudinal association of the identified maternal dietary  
921 pattern on neurodevelopmental outcomes. Accordingly, the random effects were extracted for  
922 inference, the "lme4" R- package (1.1.28) was used for modelling (75), both slopes and intercepts were  
923 scaled (estimates are interpreted as per SD change).

924 A significance level of 0.05 was used in all analyses and false-discovery rate control (FDR) applied  
925 where relevant ( $<0.05$ ). All data analyses were performed with the statistical software R version 4.1.1.  
926 Other R packages utilised in this analysis include tidyverse (v1.3.1), dplyr (v1.0.10), broom (v0.7.12),  
927 lubridate (v1.8.0), ggpubr (v0.4.0) and tableone (v0.13.0).

928 **Data Availability:** Participant-level personally identifiable data are protected under the Danish Data  
929 Protection Act and European Regulation 2016/679 of the European Parliament and of the Council  
930 (GDPR) that prohibit distribution even in pseudo-anonymized form. However, participant-level data can  
931 be made available under a data transfer agreement as part of a collaboration effort.

932 **Code Availability:** The custom code employed in this research is freely accessible to the public for  
933 transparency and reproducibility purposes.

934 **Methods-only References**

- 935 42. Bisgaard H, Vissing NH, Carson CG, Bischoff AL, Følsgaard NV, Kreiner-Møller E, et al.  
936 Deep phenotyping of the unselected COPSAC 2010 birth cohort study [Internet]. Vol. 43, *Clinical &*  
937 *Experimental Allergy*. 2013. p. 1384–94. Available from: <http://dx.doi.org/10.1111/cea.12213>
- 938 43. Mohammadzadeh P, Rosenberg JB, Vinding R, Møllegaard Jepsen JR, Lindberg U,  
939 Følsgaard N, et al. Effects of prenatal nutrient supplementation and early life exposures on  
940 neurodevelopment at age 10: a randomised controlled trial - the COPSYPH study protocol. *BMJ*  
941 *Open*. 2022 Feb 1;12(2):e047706.
- 942 44. Olsen J, Melbye M, Olsen SF, Sørensen TI, Aaby P, Andersen AM, et al. The Danish National  
943 Birth Cohort—its background, structure and aim. *Scand J Public Health*. 2001 Dec;29(4):300–7.
- 944 45. Olsen SF, Mikkelsen TB, Knudsen VK, Orozova-Bekkevold I, Halldórsson TI, Strøm M, et al.  
945 Data collected on maternal dietary exposures in the Danish National Birth Cohort. *Paediatr*  
946 *Perinat Epidemiol*. 2007 Jan;21(1):76–86.
- 947 46. Litonjua AA, Lange NE, Carey VJ, Brown S, Laranjo N, Harshfield BJ, et al. The Vitamin D  
948 Antenatal Asthma Reduction Trial (VDAART): rationale, design, and methods of a randomized,  
949 controlled trial of vitamin D supplementation in pregnancy for the primary prevention of asthma  
950 and allergies in children. *Contemp Clin Trials*. 2014 May;38(1):37–50.
- 951 47. Kelly RS, Boulin A, Laranjo N, Lee-Sarwar K, Chu SH, Yadama AP, et al. Metabolomics and  
952 Communication Skills Development in Children; Evidence from the Ages and Stages  
953 Questionnaire. *Metabolites* [Internet]. 2019 Mar 5;9(3). Available from:  
954 <http://dx.doi.org/10.3390/metabo9030042>
- 955 48. Bisgaard H. The Copenhagen Prospective Study on Asthma in Childhood (COPSAC): design,  
956 rationale, and baseline data from a longitudinal birth cohort study. *Ann Allergy Asthma Immunol*.  
957 2004 Oct;93(4):381–9.
- 958 49. Obel C, Heiervang E, Rodriguez A, Heyerdahl S, Smedje H, Sourander A, et al. The  
959 Strengths and Difficulties Questionnaire in the Nordic countries. *Eur Child Adolesc Psychiatry*.  
960 2004;13 Suppl 2:II32–9.
- 961 50. Sveen TH, Berg-Nielsen TS, Lydersen S, Wichstrøm L. Detecting psychiatric disorders in  
962 preschoolers: screening with the strengths and difficulties questionnaire. *J Am Acad Child*  
963 *Adolesc Psychiatry*. 2013 Jul;52(7):728–36.
- 964 51. Kaufman J, Birmaher B, Brent D, Rao U, Flynn C, Moreci P, et al. Schedule for Affective  
965 Disorders and Schizophrenia for School-Age Children—Present and Lifetime Version (K-SADS-  
966 PL): initial reliability and validity data. *J Am Acad Child Adolesc Psychiatry*. 1997 Jul;36(7):980–8.
- 967 52. American Psychiatric Association. *Diagnostic and Statistical Manual of Mental Disorders:*  
968 *DSM-5-TR*. 2022. 1120 p.
- 969 53. World Health Organization. *The International Statistical Classification of Diseases and Health*  
970 *Related Problems ICD-10: Tenth Revision. Volume 2: Instruction Manual*. World Health  
971 Organization; 2004. 198 p.
- 972 54. Friis S, Kruger Kjaer S, Stripp C, Overvad K. Reproducibility and relative validity of a self-  
973 administered semiquantitative food frequency questionnaire applied to younger women. *J Clin*  
974 *Epidemiol*. 1997 Mar;50(3):303–11.
- 975 55. Mikkelsen TB, Olsen SF, Rasmussen SE, Osler M. Relative validity of fruit and vegetable  
976 intake estimated by the food frequency questionnaire used in the Danish National Birth Cohort.  
977 *Scand J Public Health*. 2007;35(2):172–9.
- 978 56. Mikkelsen TB, Osler M, Olsen SF. Validity of protein, retinol, folic acid and n-3 fatty acid  
979 intakes estimated from the food-frequency questionnaire used in the Danish National Birth

- 980 Cohort. *Public Health Nutr.* 2006 Sep;9(6):771–8.
- 981 57. Paperpile [Internet]. [cited 2023 Oct 26]. Danish Food Composition Data, Version 7. Available  
982 from: <https://paperpile.com/app/p/49f46071-353d-0183-9823-b8b1c9c5898d>
- 983 58. Bjerregaard AA, Halldorsson TI, Kampmann FB, Olsen SF, Tetens I. Relative validity of a  
984 web-based food frequency questionnaire for Danish adolescents. *Nutr J.* 2018 Jan 12;17(1):9.
- 985 59. Kachroo P, Kelly RS, Mirzakhani H, Lee-Sarwar K, Chawes BL, Blighe K, et al. Fish oil  
986 supplementation during pregnancy is protective against asthma/wheeze in offspring. *J Allergy  
987 Clin Immunol Pract.* 2020 Jan;8(1):388–91.e2.
- 988 60. Schmidt M, Schmidt SAJ, Sandegaard JL, Ehrenstein V, Pedersen L, Sørensen HT. The  
989 Danish National Patient Registry: a review of content, data quality, and research potential. *Clin  
990 Epidemiol.* 2015 Nov 17;7:449–90.
- 991 61. Mors O, Perto GP, Mortensen PB. The Danish Psychiatric Central Research Register. *Scand  
992 J Public Health.* 2011 Jul;39(7 Suppl):54–7.
- 993 62. Pottegård A, Schmidt SAJ, Wallach-Kildemoes H, Sørensen HT, Hallas J, Schmidt M. Data  
994 Resource Profile: The Danish National Prescription Registry. *Int J Epidemiol.* 2017 Jun  
995 1;46(3):798–798f.
- 996 63. Kessler RC, Adler L, Ames M, Demler O, Faraone S, Hiripi E, et al. The World Health  
997 Organization Adult ADHD Self-Report Scale (ASRS): a short screening scale for use in the  
998 general population. *Psychol Med.* 2005 Feb;35(2):245–56.
- 999 64. Adler LA, Faraone SV, Sarocco P, Atkins N, Khachatryan A. Establishing US norms for the  
1000 Adult ADHD Self-Report Scale (ASRS-v1.1) and characterising symptom burden among adults  
1001 with self-reported ADHD. *Int J Clin Pract.* 2019 Jan;73(1):e13260.
- 1002 65. Rago D, Rasmussen MA, Lee-Sarwar KA, Weiss ST, Lasky-Su J, Stokholm J, et al. Fish-oil  
1003 supplementation in pregnancy, child metabolomics and asthma risk. *EBioMedicine.* 2019  
1004 Aug;46:399–410.
- 1005 66. Stekhoven DJ, Bühlmann P. MissForest--non-parametric missing value imputation for mixed-  
1006 type data. *Bioinformatics.* 2012 Jan 1;28(1):112–8.
- 1007 67. Website [Internet]. Available from: Robinson D Bryan J Elias. 2020. “Fuzzyjoin: Join Tables  
1008 Together on Inexact Matching. 2020” Version 0.1.6 (May). [https://cran.r-  
1009 project.org/web/packages/fuzzyjoin/index.html](https://cran.r-project.org/web/packages/fuzzyjoin/index.html).
- 1010 68. Demontis D, Walters RK, Martin J, Mattheisen M, Als TD, Agerbo E, et al. Discovery of the  
1011 first genome-wide significant risk loci for attention deficit/hyperactivity disorder. *Nat Genet.* 2019  
1012 Jan;51(1):63–75.
- 1013 69. Grove J, Ripke S, Als TD, Mattheisen M, Walters RK, Won H, et al. Identification of common  
1014 genetic risk variants for autism spectrum disorder. *Nat Genet.* 2019 Mar;51(3):431–44.
- 1015 70. Ge T, Chen CY, Ni Y, Feng YCA, Smoller JW. Polygenic prediction via Bayesian regression  
1016 and continuous shrinkage priors. *Nat Commun.* 2019 Apr 16;10(1):1776.
- 1017 71. PLINK 2.0 [Internet]. [cited 2023 Mar 29]. Available from: [https://www.cog-  
1018 genomics.org/plink/2.0/](https://www.cog-genomics.org/plink/2.0/)
- 1019 72. Williams DR, Rast P. Back to the basics: Rethinking partial correlation network methodology.  
1020 *Br J Math Stat Psychol.* 2020 May;73(2):187–212.
- 1021 73. Marsál K, Persson PH, Larsen T, Lilja H, Selbing A, Sultan B. Intrauterine growth curves  
1022 based on ultrasonically estimated foetal weights. *Acta Paediatr.* 1996 Jul;85(7):843–8.
- 1023 74. Josse J, Husson F. **missMDA**: A Package for Handling Missing Values in Multivariate Data  
1024 Analysis [Internet]. Vol. 70, *Journal of Statistical Software.* 2016. Available from:



1025 <http://dx.doi.org/10.18637/jss.v070.i01>

1026 75. Bates D, Mächler M, Bolker B, Walker S. Fitting Linear Mixed-Effects Models Using **lme4**  
1027 [Internet]. Vol. 67, Journal of Statistical Software. 2015. Available from:  
1028 <http://dx.doi.org/10.18637/jss.v067.i01>

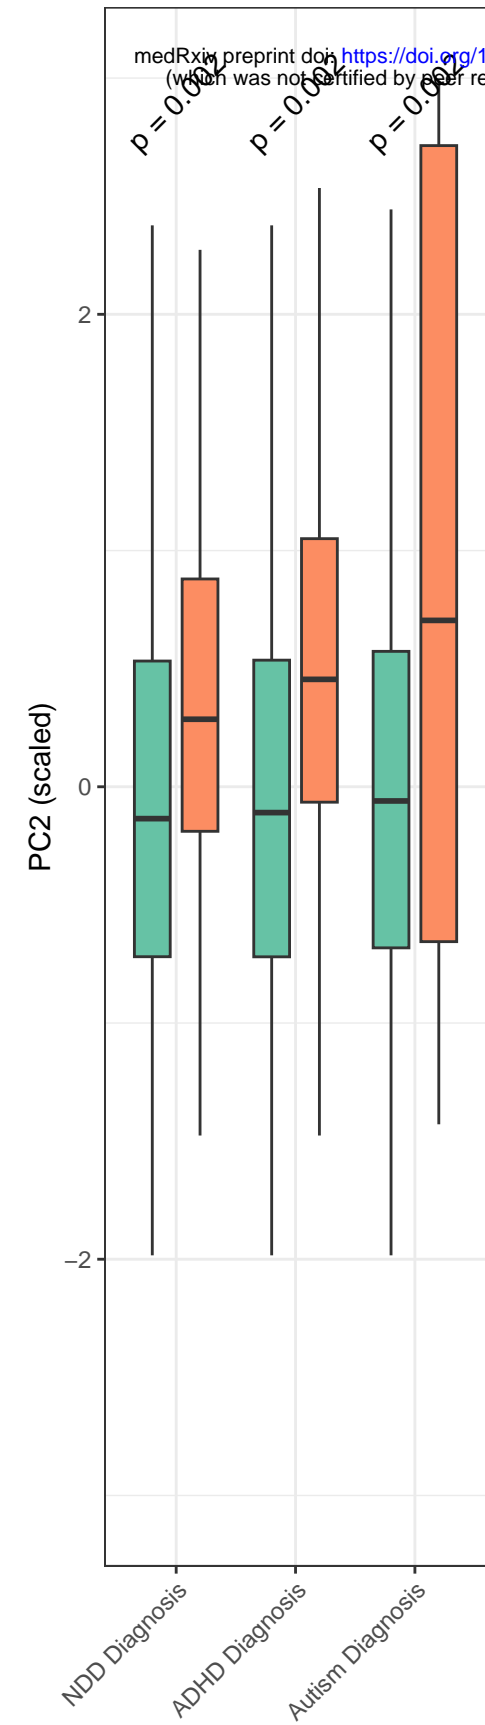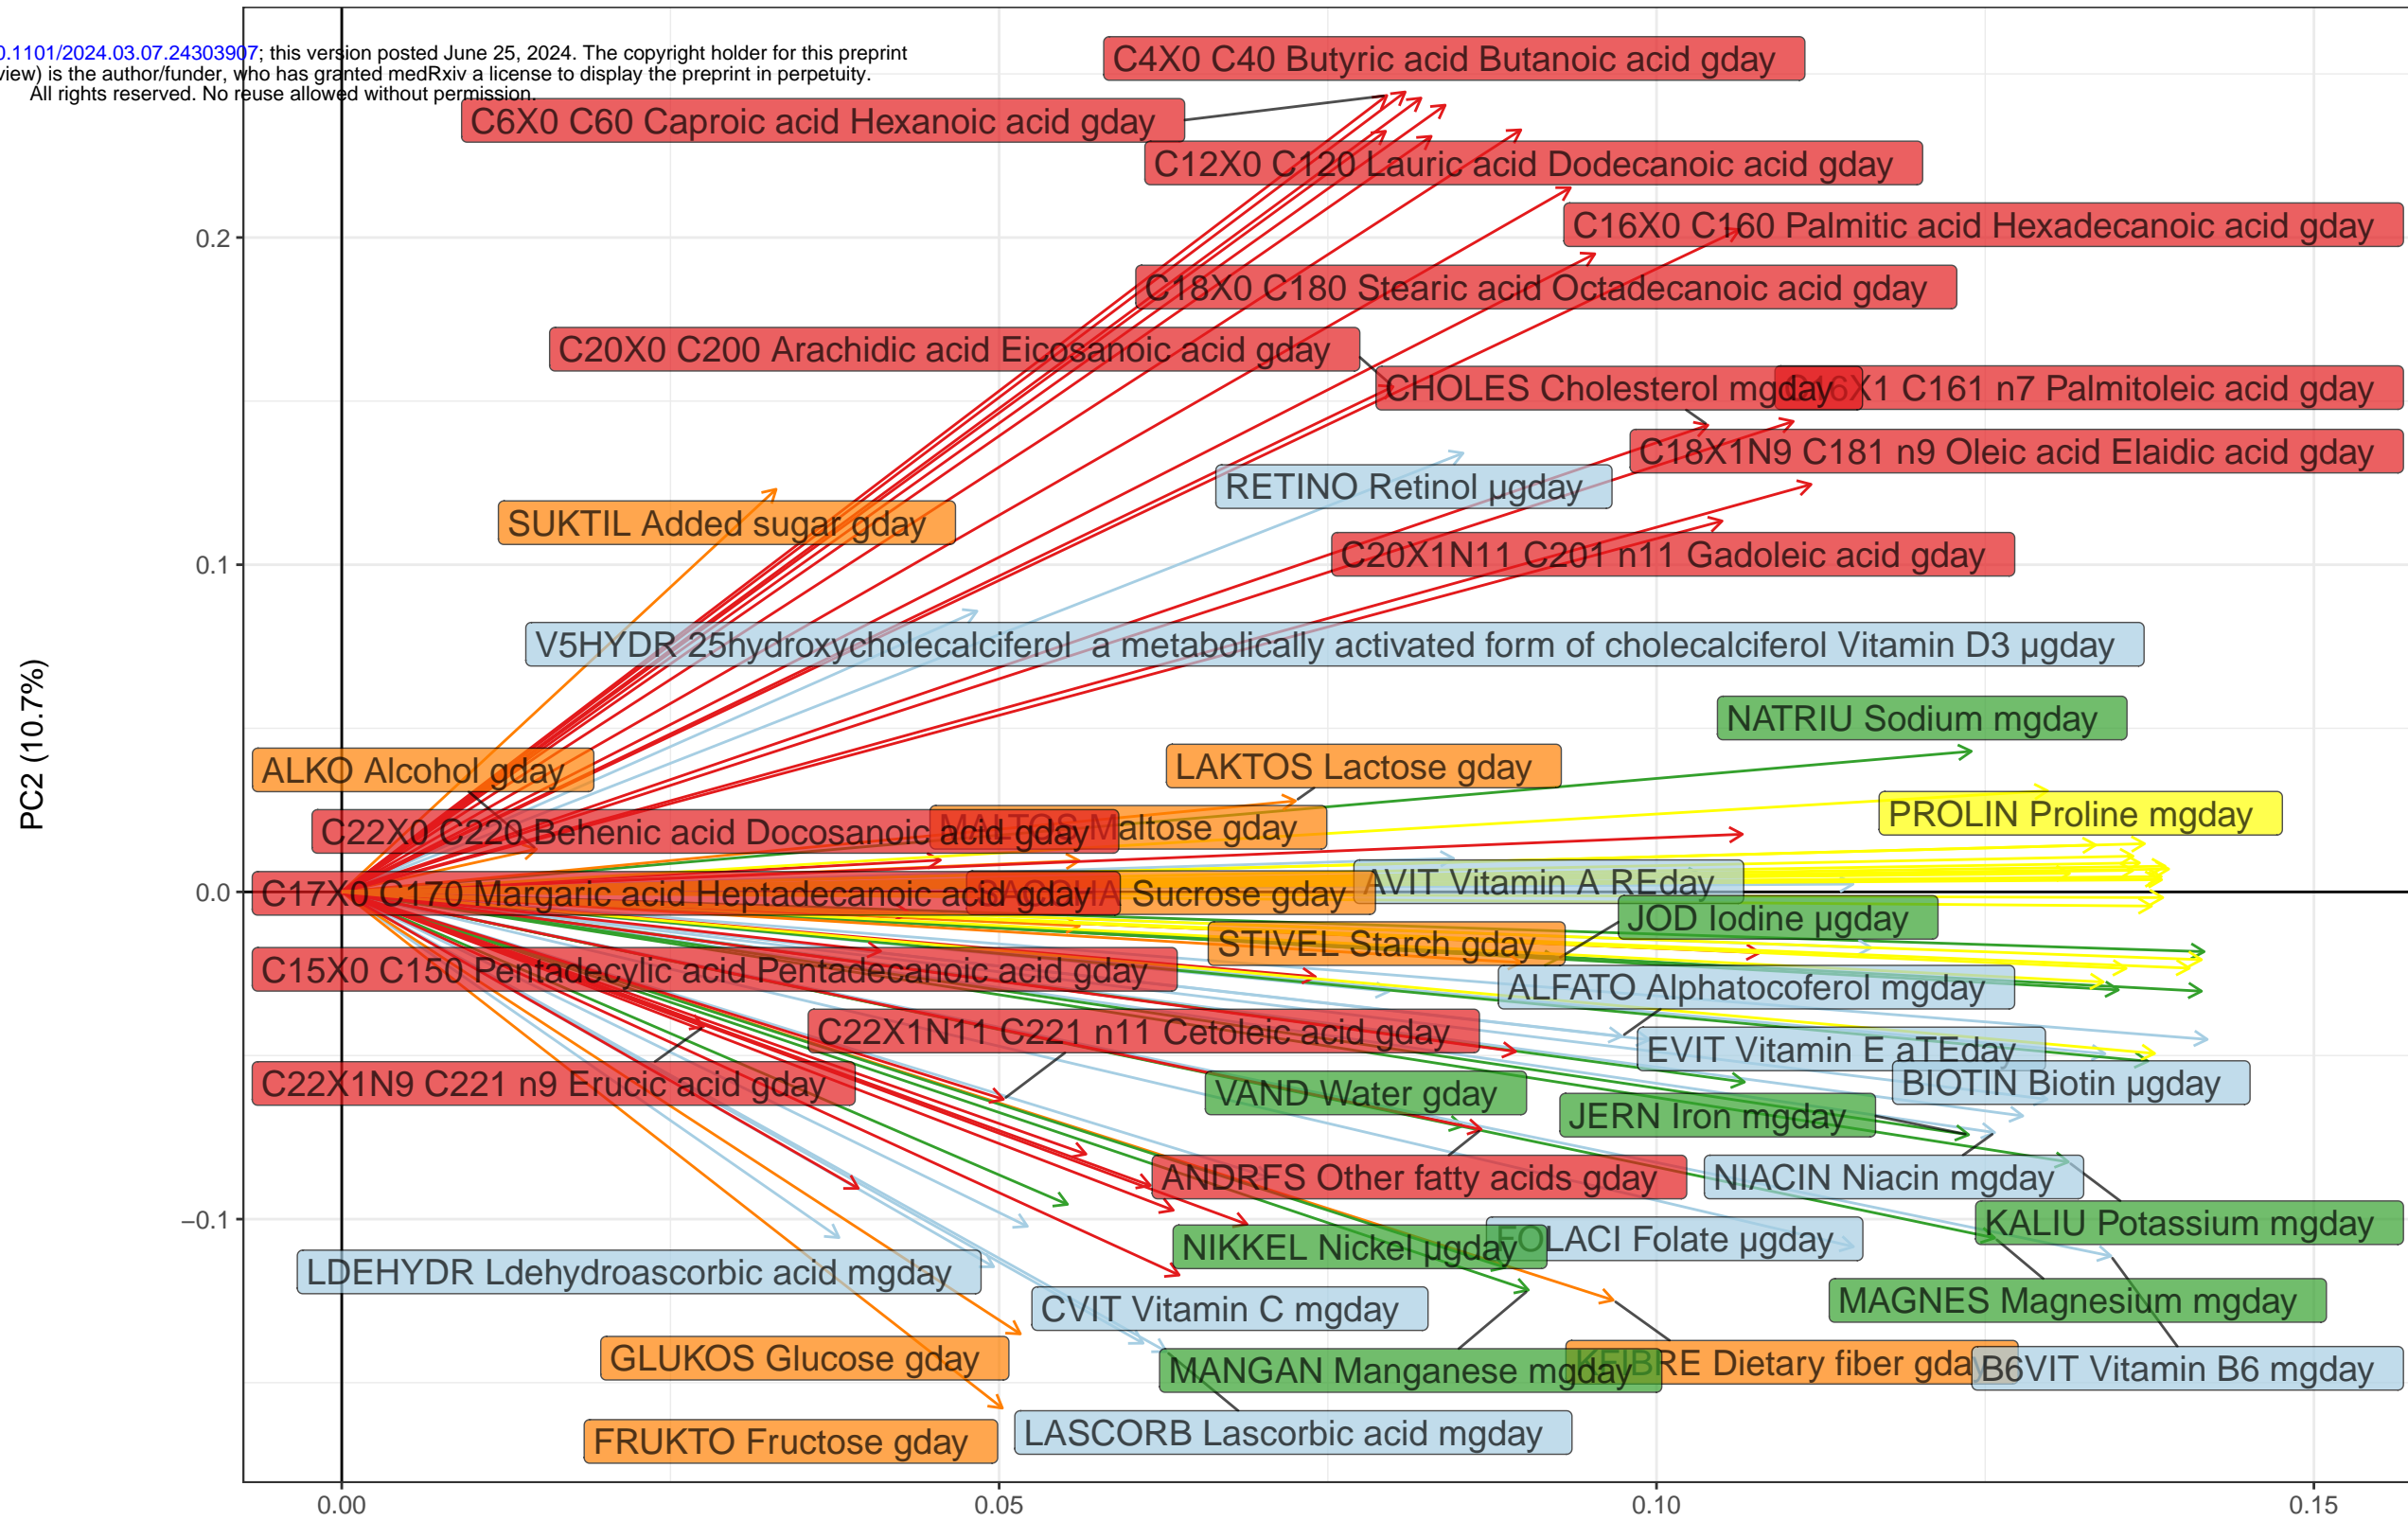

Neurodevelopmental Diagnosis  
 No  
 Yes

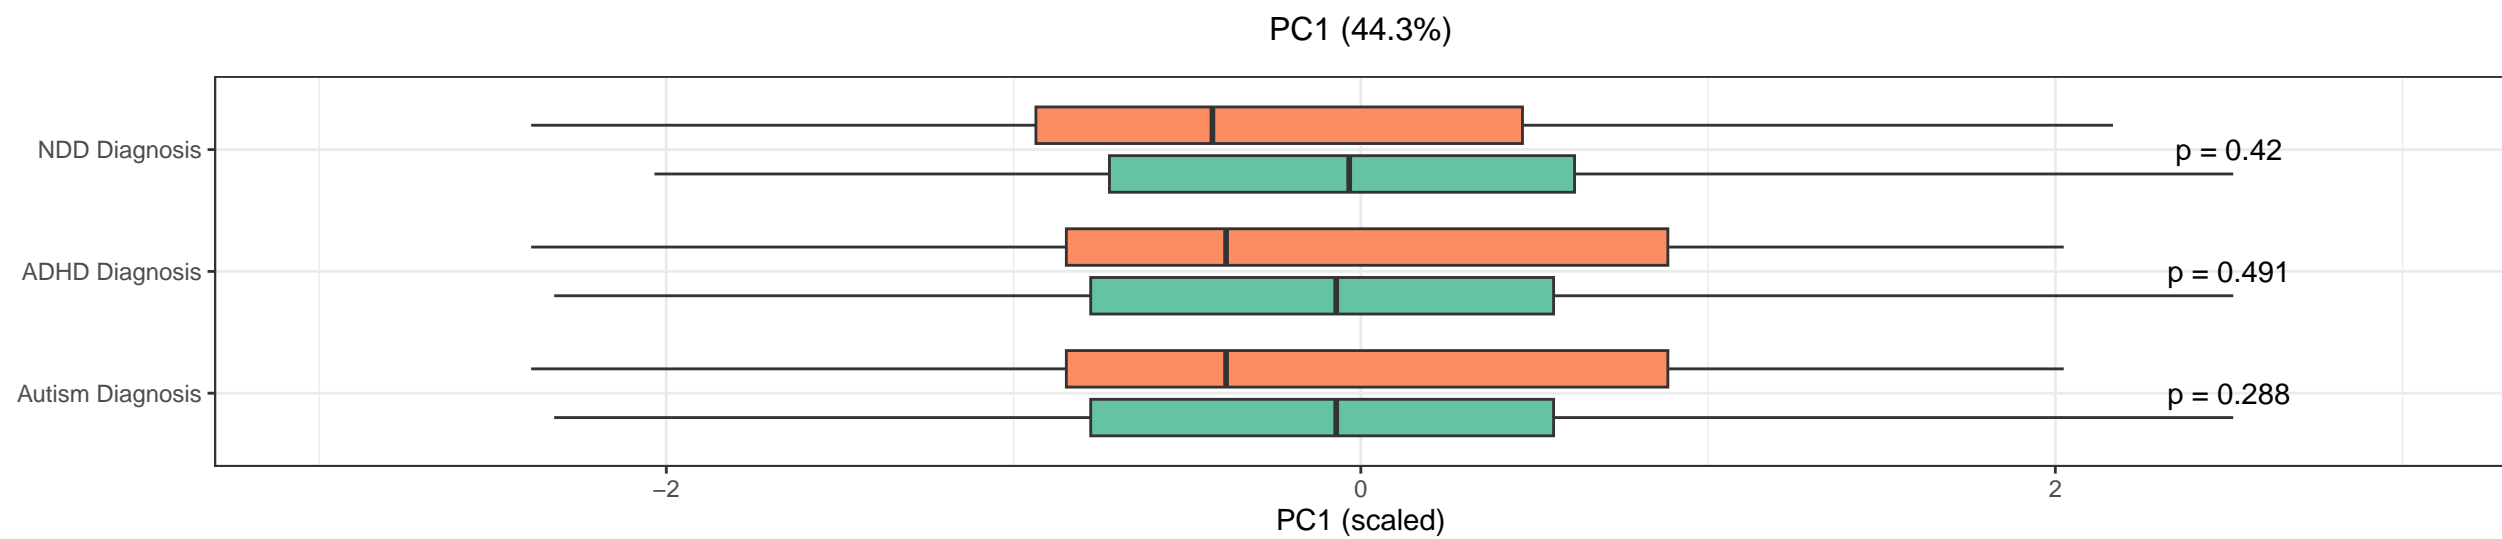

**Supplementary Figure S1.** Biplot of the first two principal components (PCs) from the maternal food frequency questionnaire-derived nutrient constituents. PC2 (Western dietary pattern) is significantly associated with any neurodevelopmental disorder (OR 1.53 [1.17 - 2.00],  $p=0.002$ ), ADHD (OR 1.66 [1.21 - 2.27],  $p = 0.002$ ), and autism diagnosis (OR 2.22 [1.33 - 3.74],  $p = 0.002$ ). PC1 is not significantly associated with any neurodevelopmental disorders ( $p > 0.288$ ). Further details of the loadings for each of the 95 nutrient constituents can be viewed in supplementary table 2.

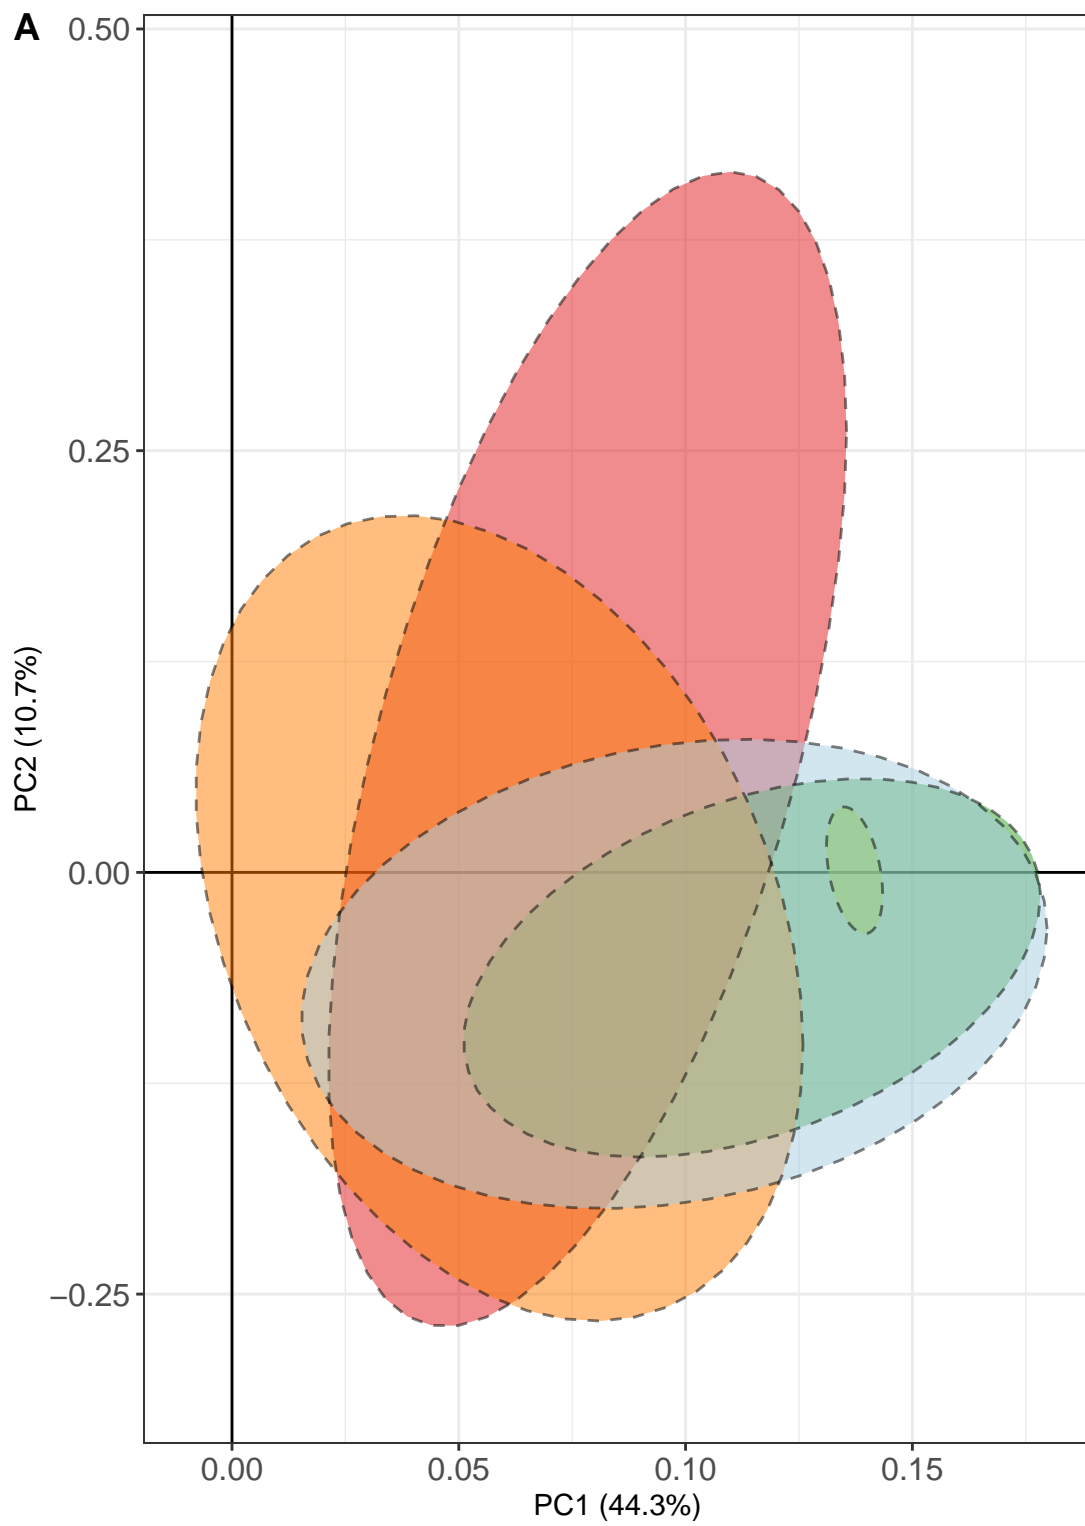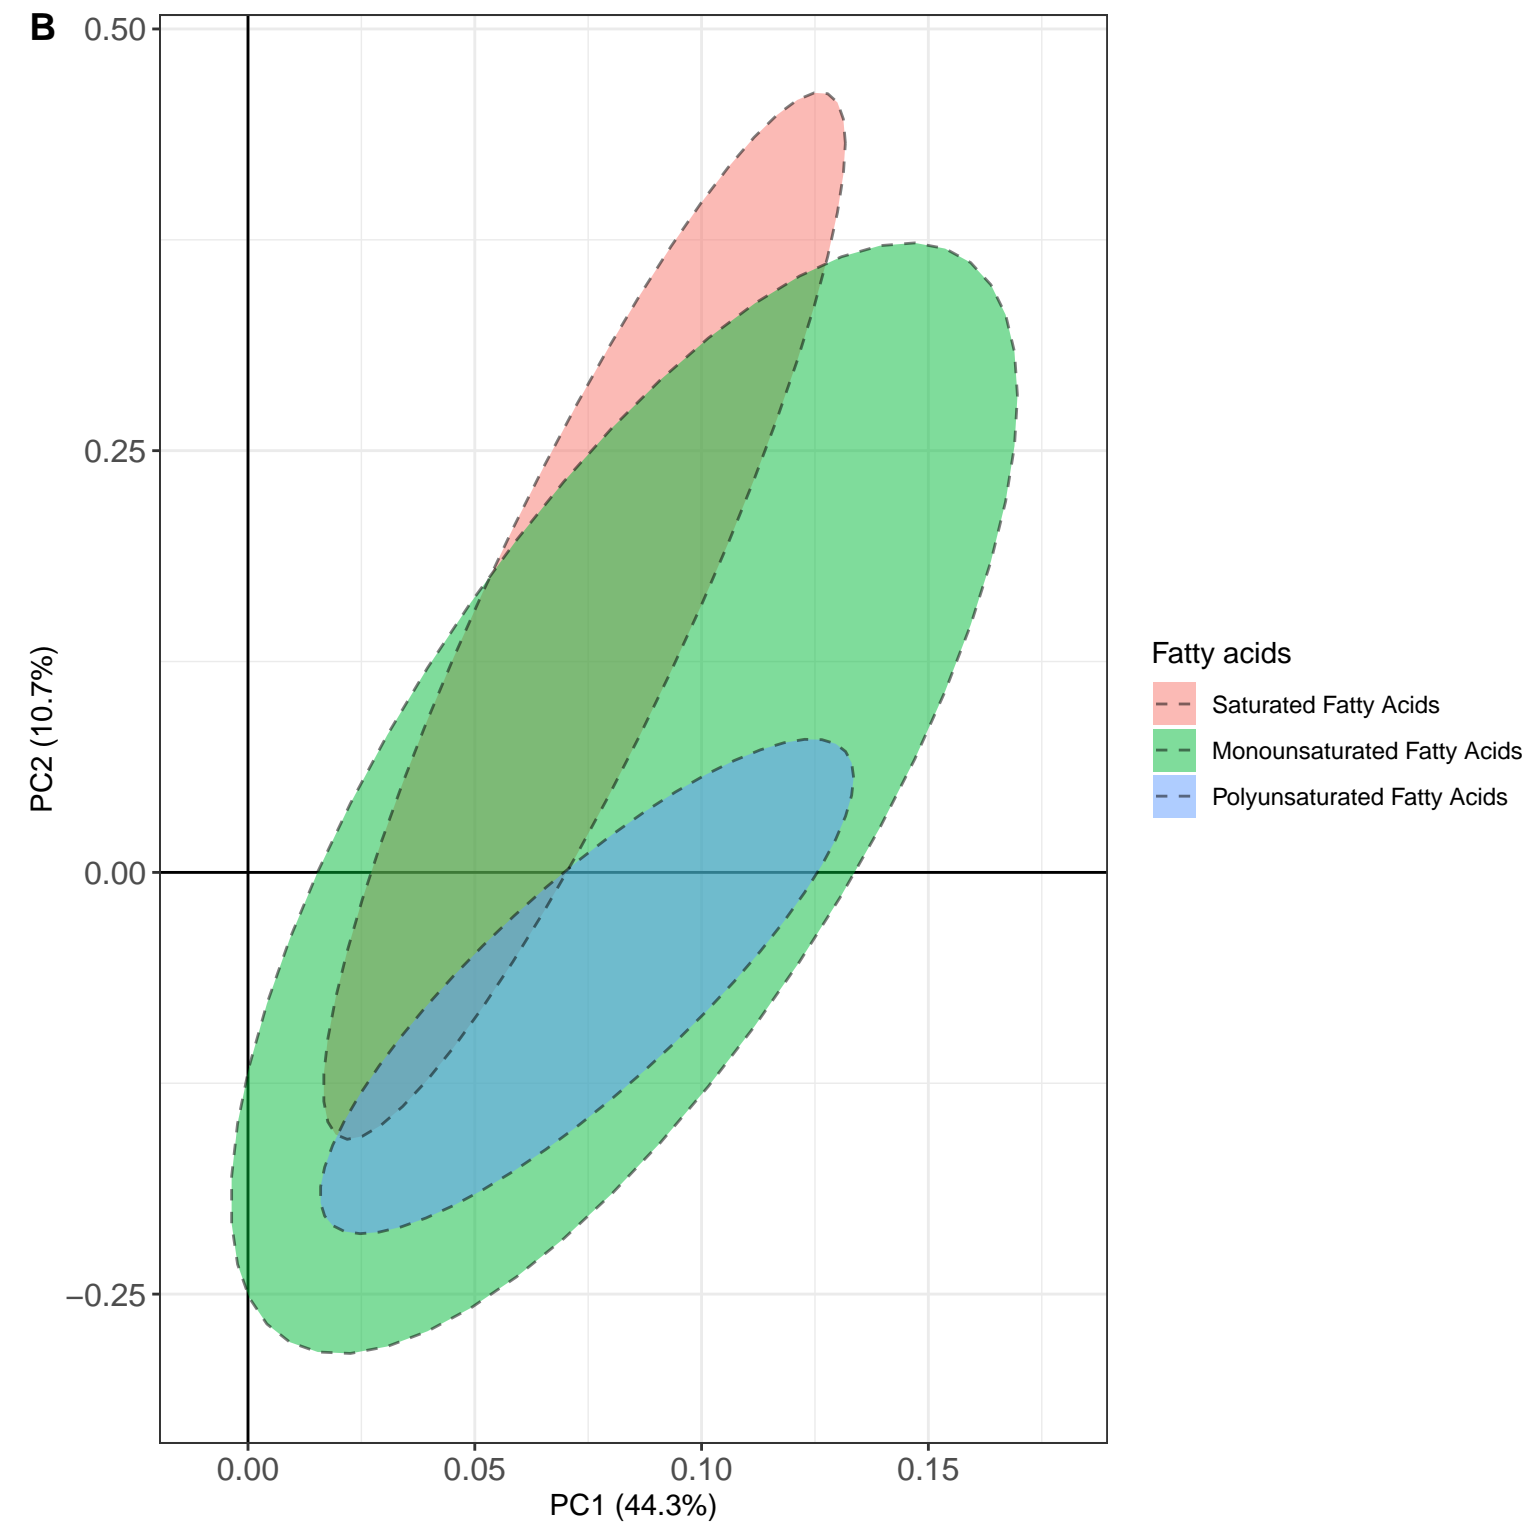

**Supplementary Figure S2.** Biplot of the first two principal components from the maternal FFQ-derived nutrient constituents **A)** Nutrient constituents are categorised into fatty acids, amino acids, sugars, minerals and vitamins. Fatty acids are a key determinant of PC2 (Western dietary pattern) **B)** Stratified further by fatty acid type, saturated fatty acids are most associated with PC2 (Western dietary pattern).

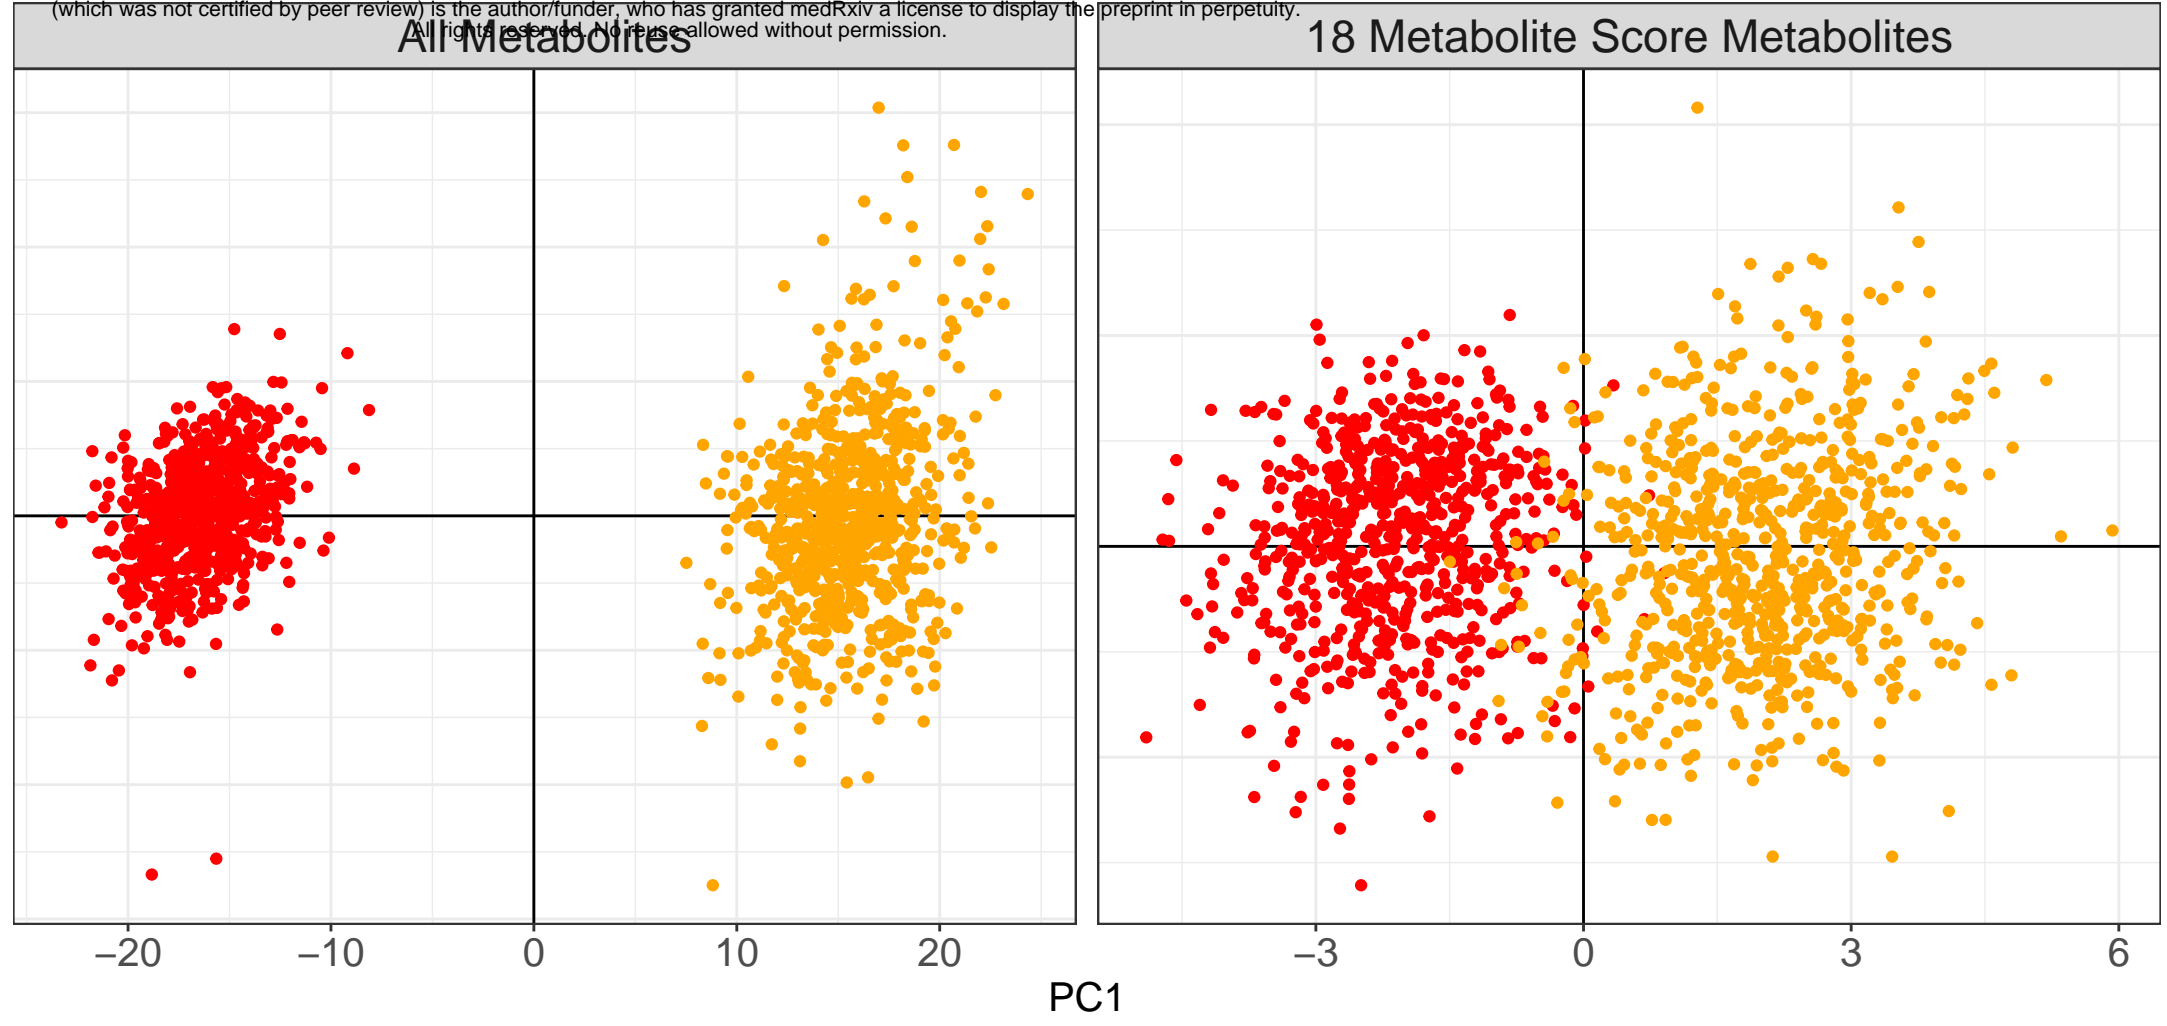

Cohorts • COPSAC2010 24 weeks Pregnancy • VDAART 10–18 weeks Pregnancy

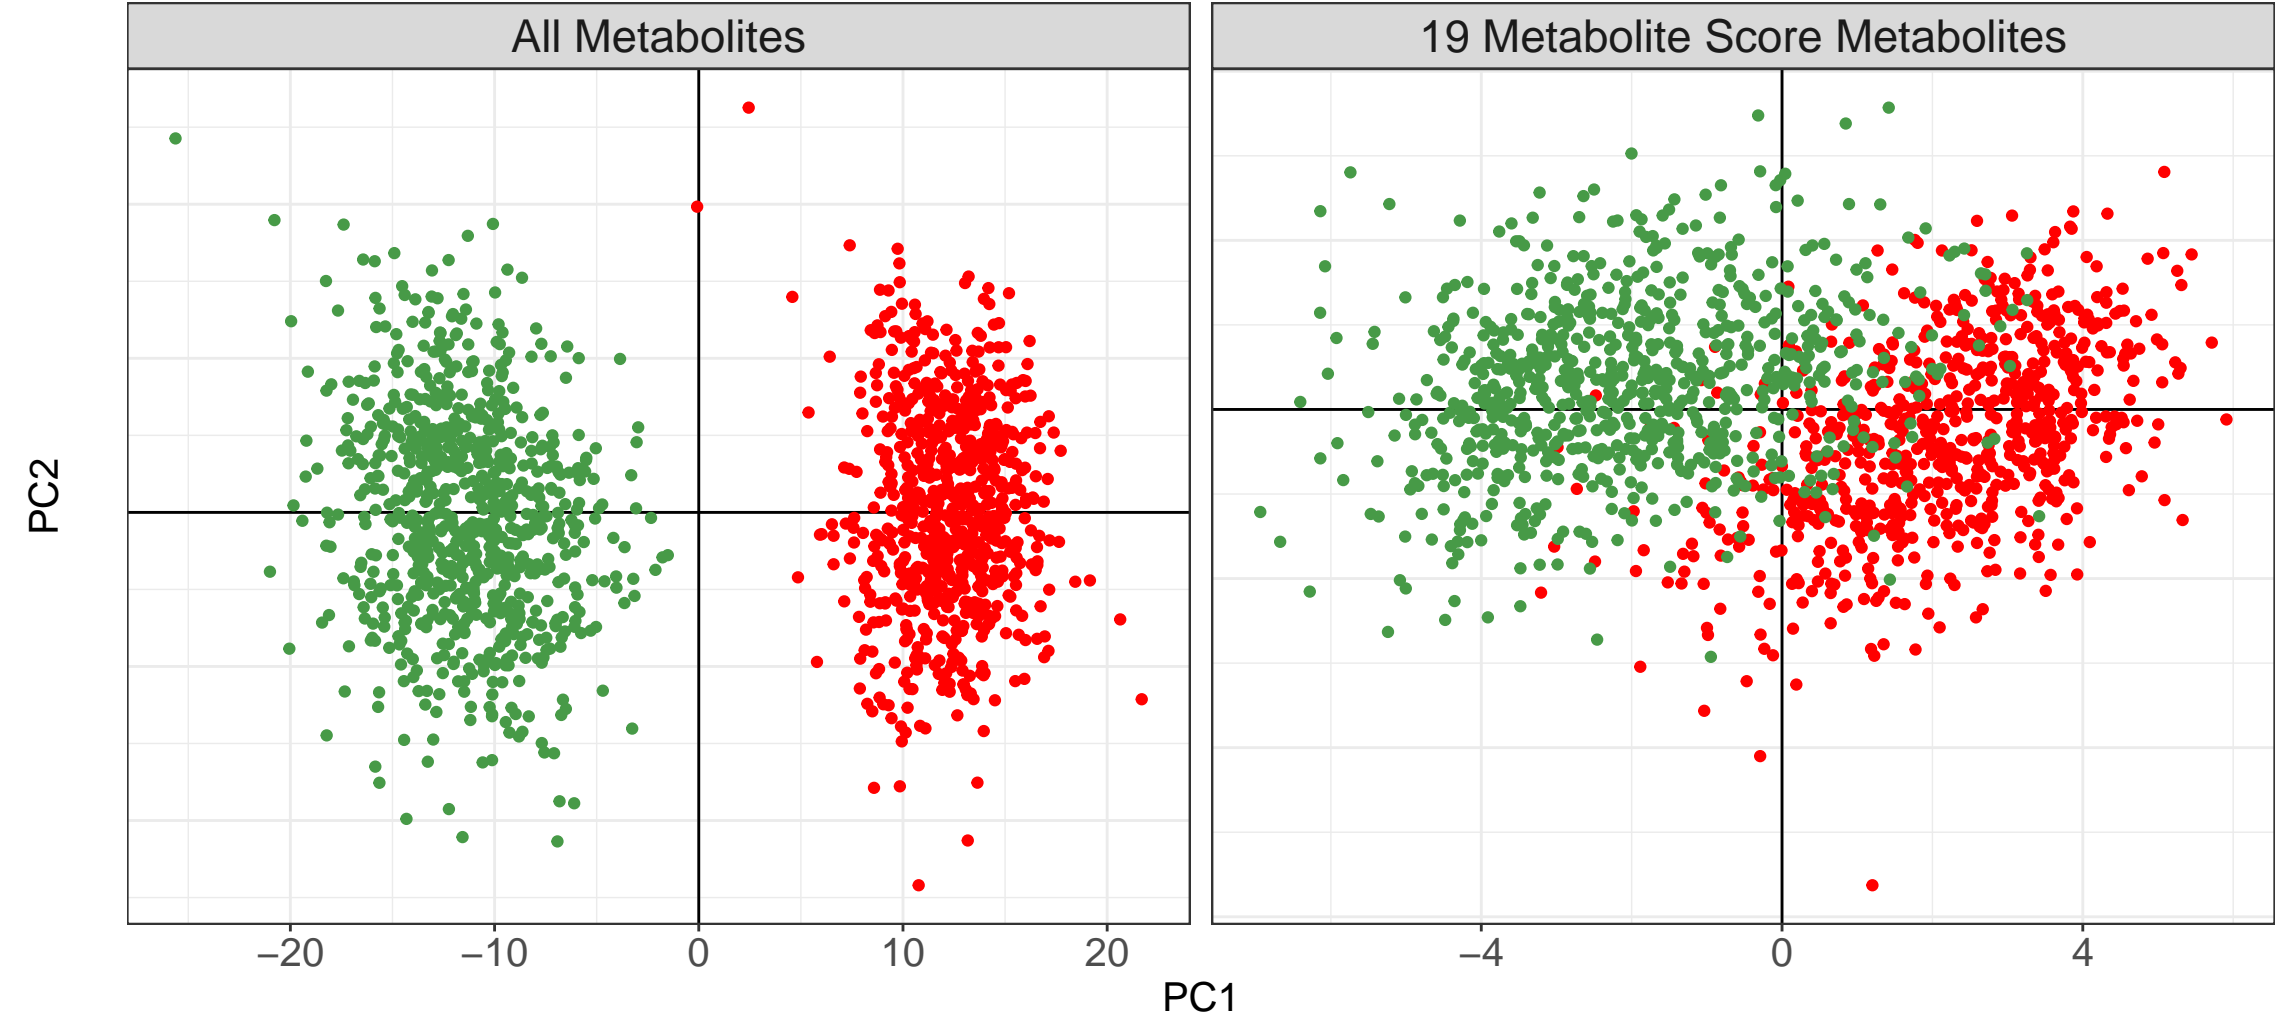

Cohorts • COPSAC2010 24 weeks Pregnancy • VDAART 32–38 weeks Pregnancy

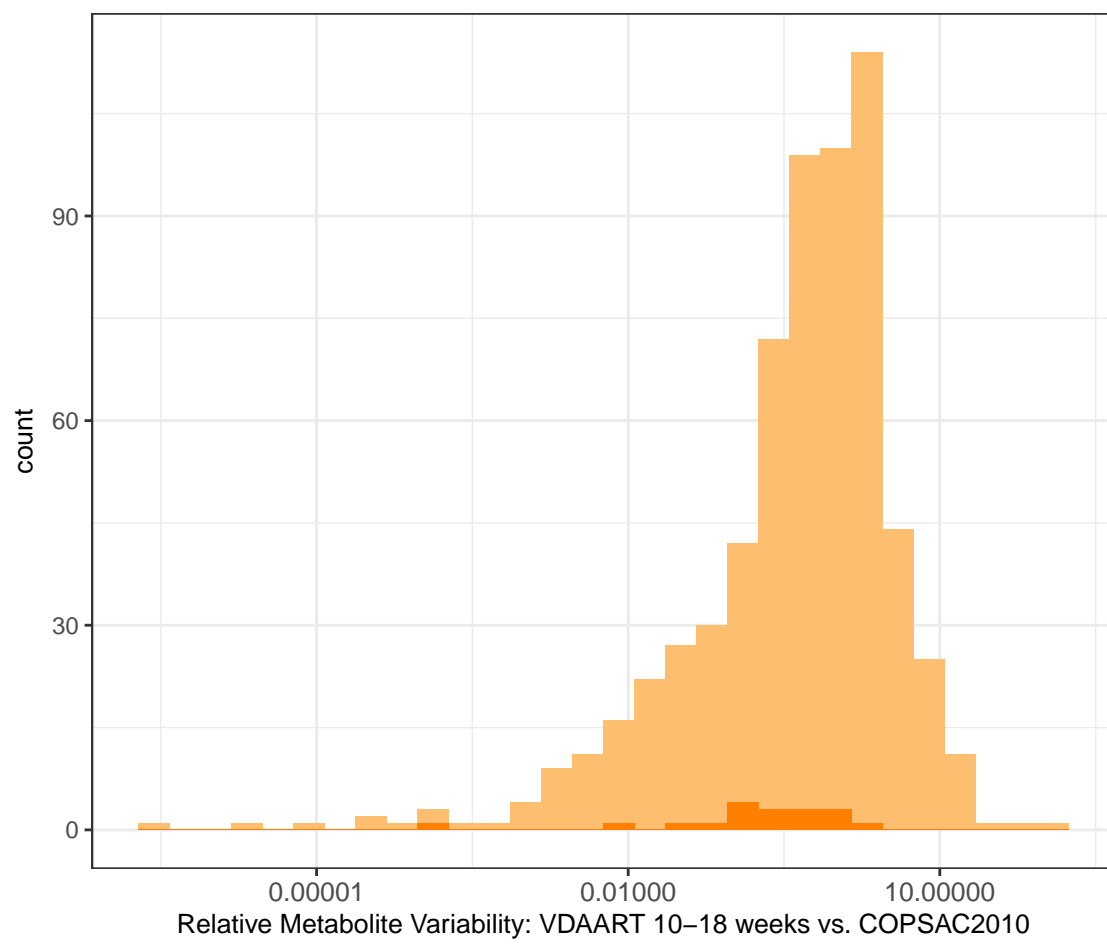

Metabolites 622 Remaining Metabolites 18 Metabolite Score Metabolites

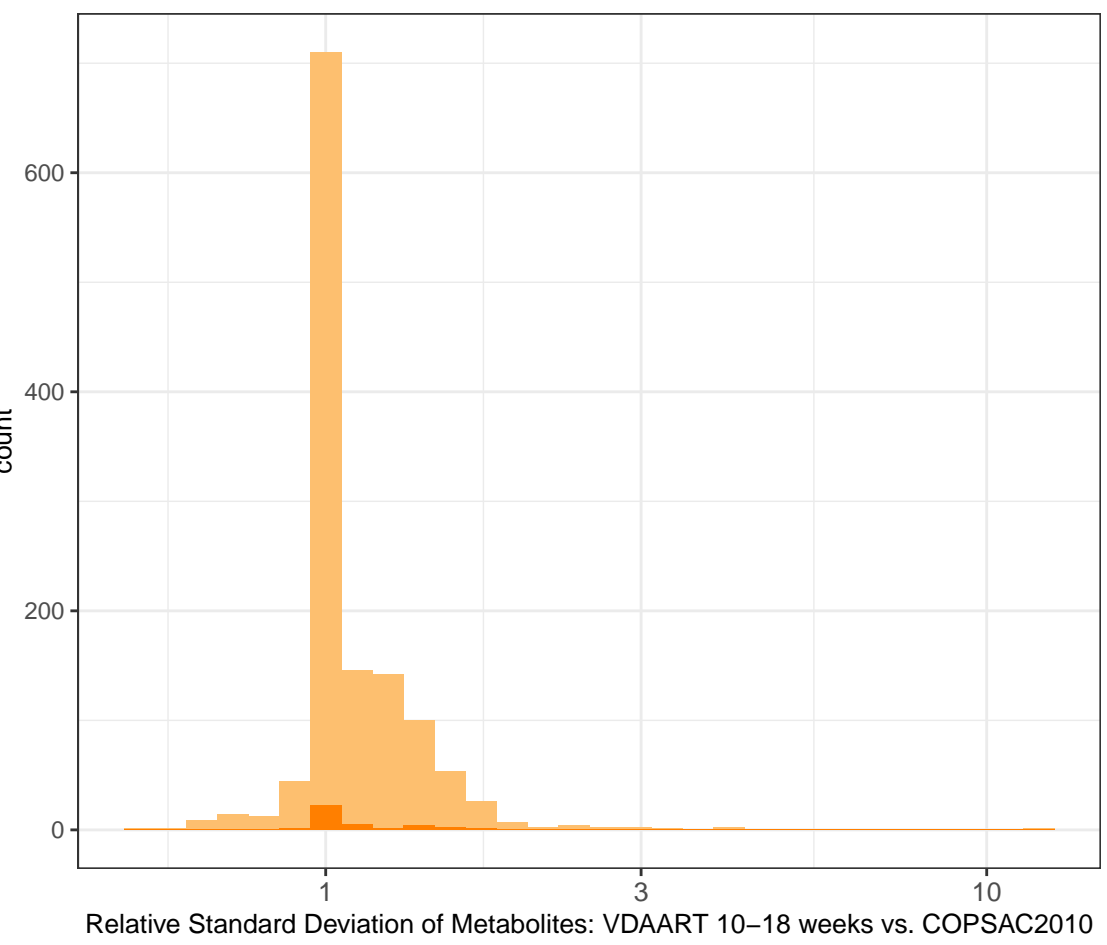

Metabolites 622 Remaining Metabolites 18 Metabolite Score Metabolites

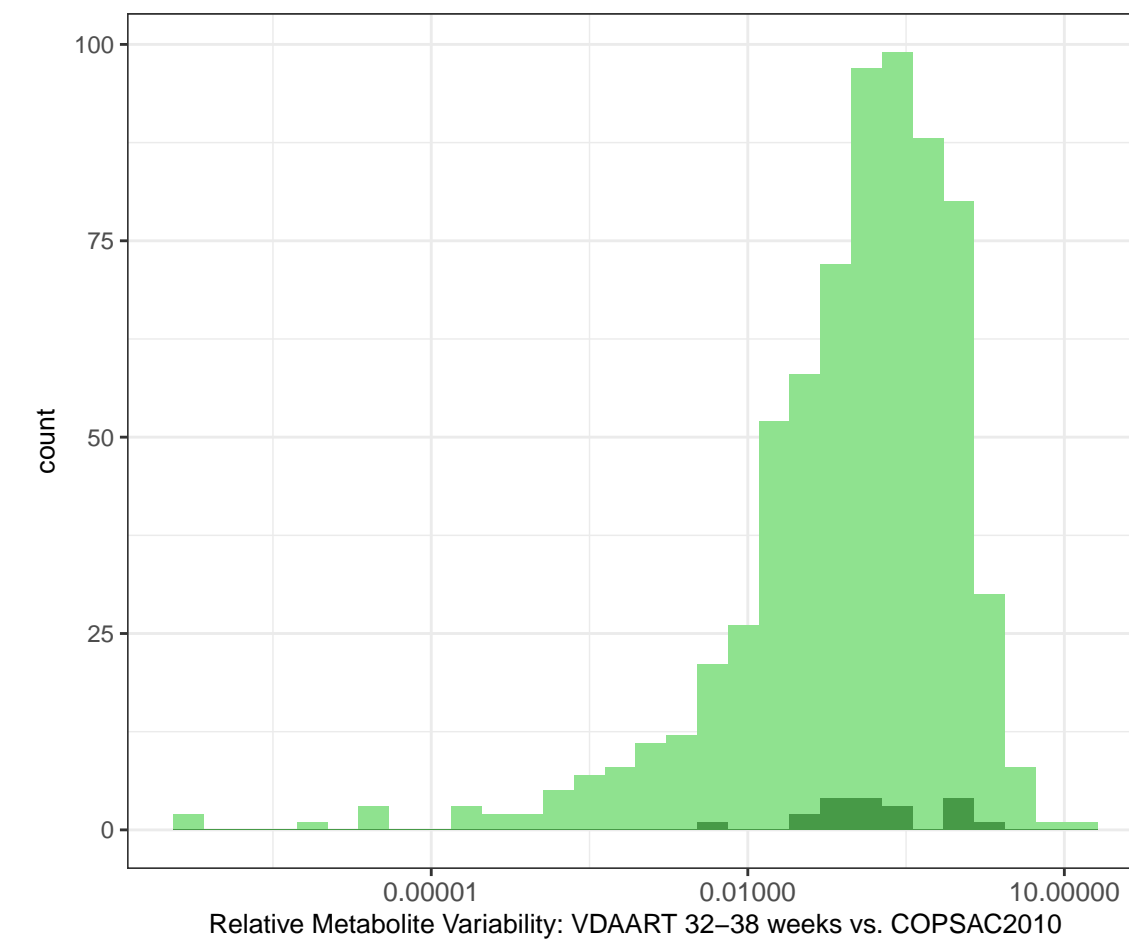

Metabolites 670 Remaining Metabolites 19 Metabolite Score Metabolites

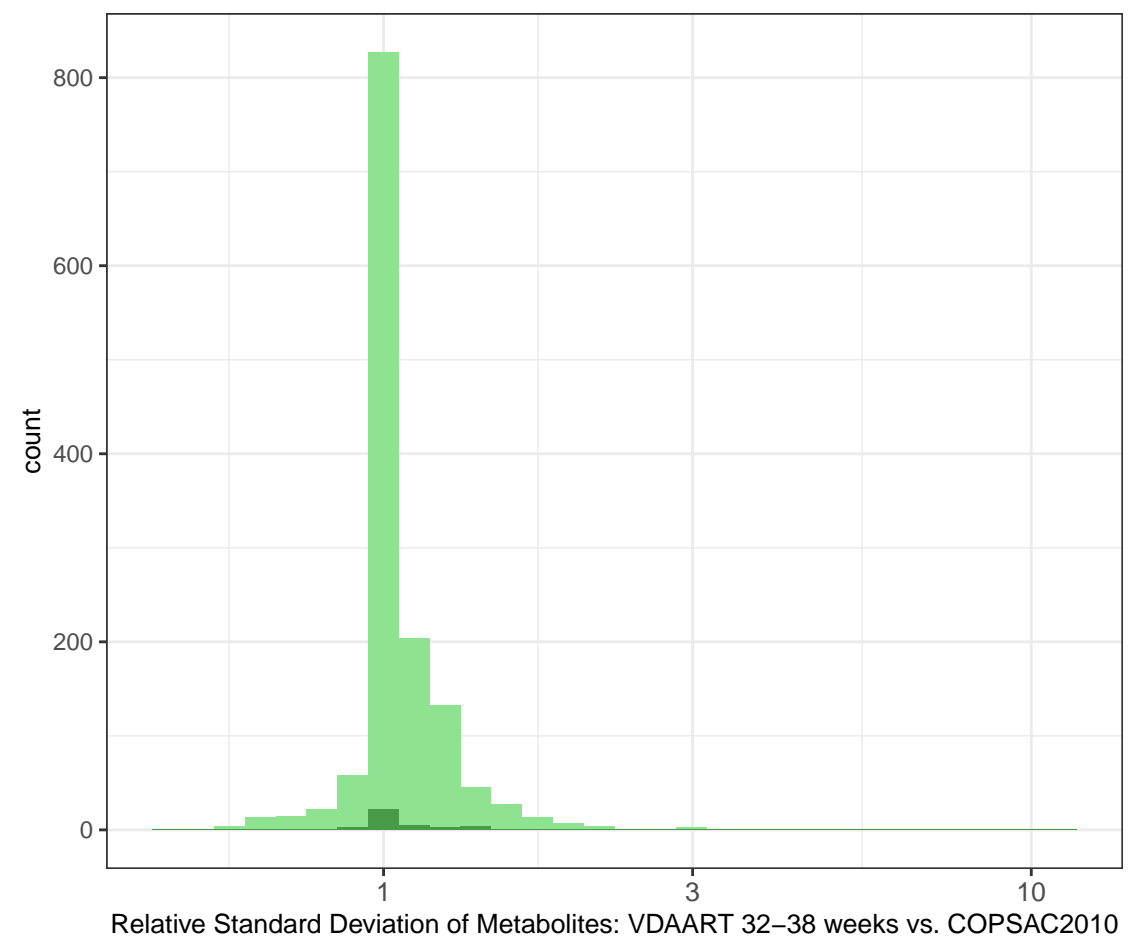

Metabolites 670 Remaining Metabolites 19 Metabolite Score Metabolites

**Supplementary Figure S3.** Comparison of maternal blood metabolomes at three different pregnancy timepoints from two mother-child cohorts. Top panels show a Principal Component Analysis (PCA) scoreplot on all metabolites, as well as the selected metabolite scores for the COPSAC2010 vs VDAART 10-18 weeks (left) and COPSAC2010 vs VDAART 32-38 weeks (right). Bottom panels show the relative variation per metabolite computed by the ratio of sums of squares ( $SSQ_{\text{line}} / SSQ_{\text{residual}}$ ) from a one-way anova model with Time/Cohort at predictor and Comparison of per metabolite standard deviation within cohort relative to 24 week gestation pregnancy time point from COPSAC2010 for the COPSAC2010 vs VDAART 10-18 weeks (left) and COPSAC2010 vs VDAART 32-38 weeks (right).

# VDAART Pregnancy FFQs Associate with Western Dietary Pattern Metabolite Scores

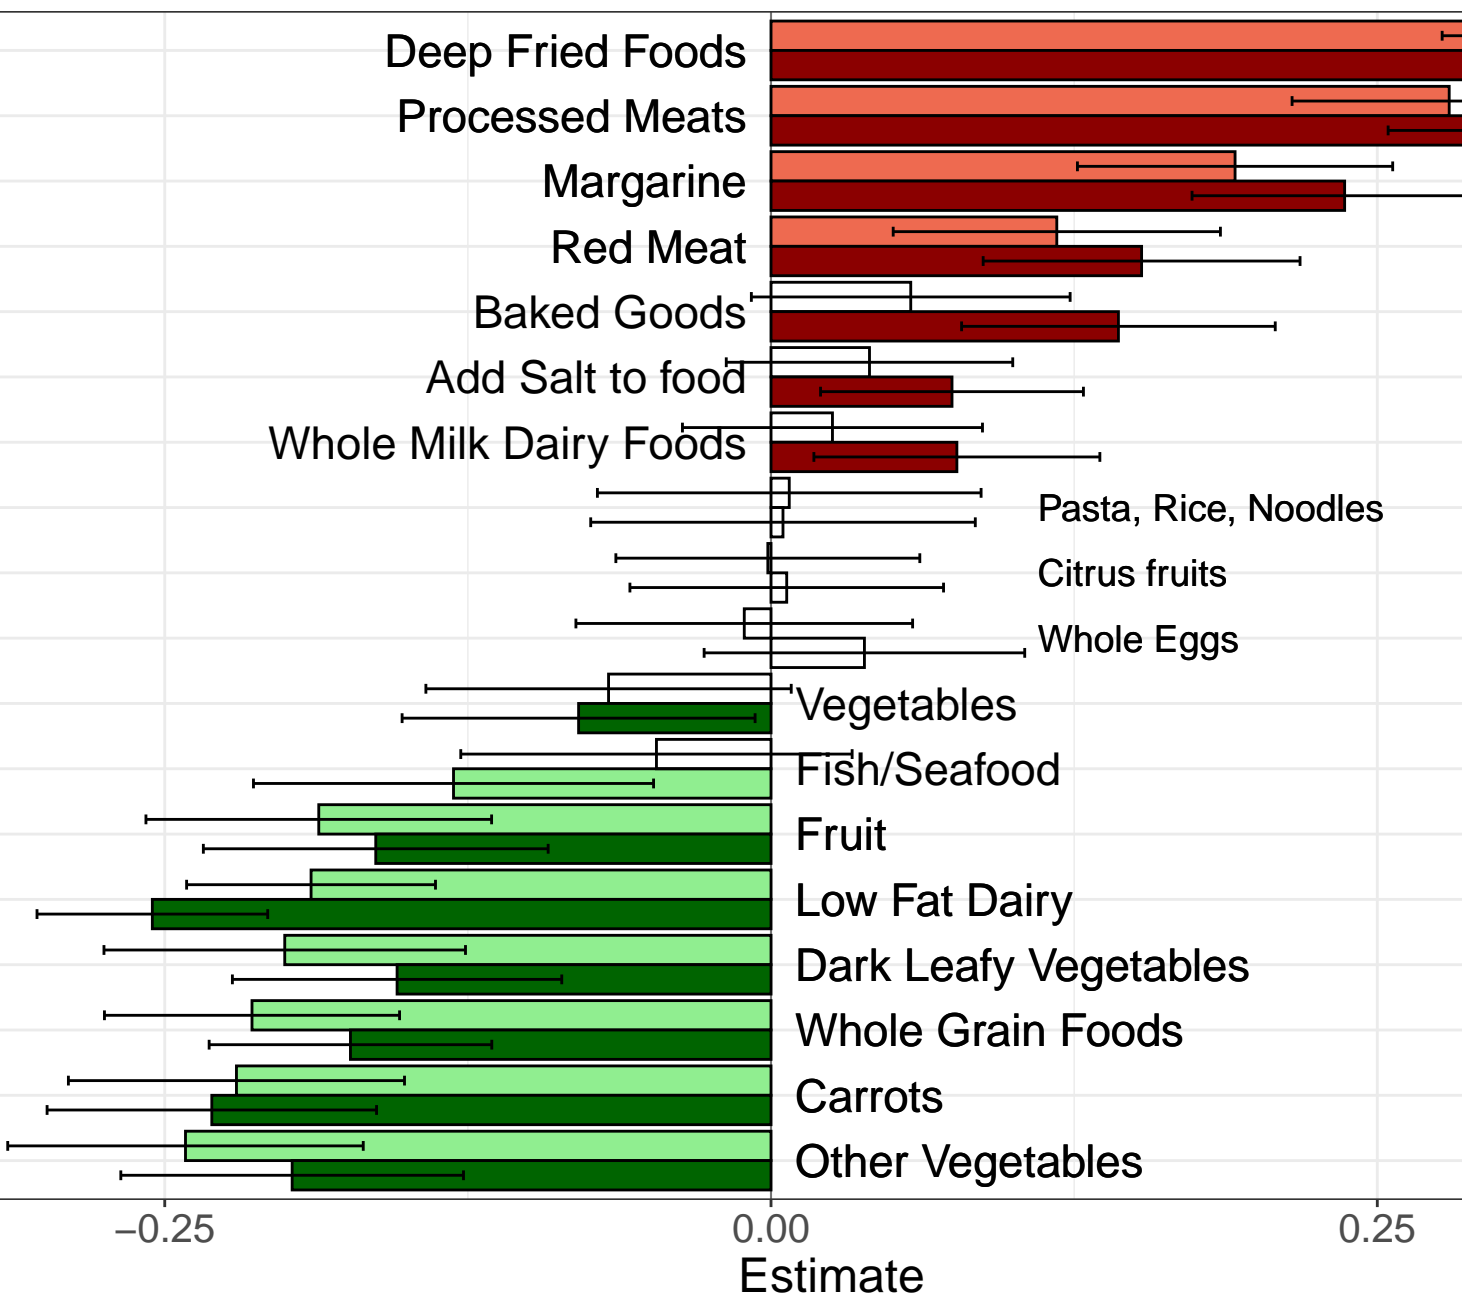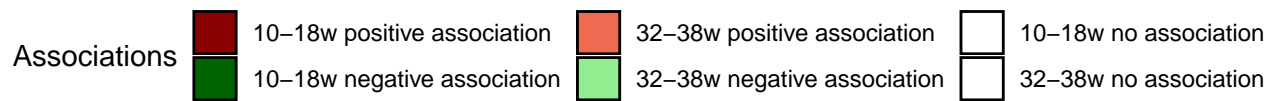



**Supplementary Figure S4.** Associations between dietary intake from food frequency questionnaires (FFQs) during pregnancy and Western Dietary Pattern Metabolite Scores (WDP-MS) at two distinct timepoints (10-18 weeks and 32-38 weeks) in the VDAART cohort. The depicted associations, based on the VDAART cohort, were assessed using COPSAC2010 cohort-trained models that shared overlapping metabolites.

# ADHD Mediation by Metabolites: Models Based on COPSAC2010 with VDAART Timepoints

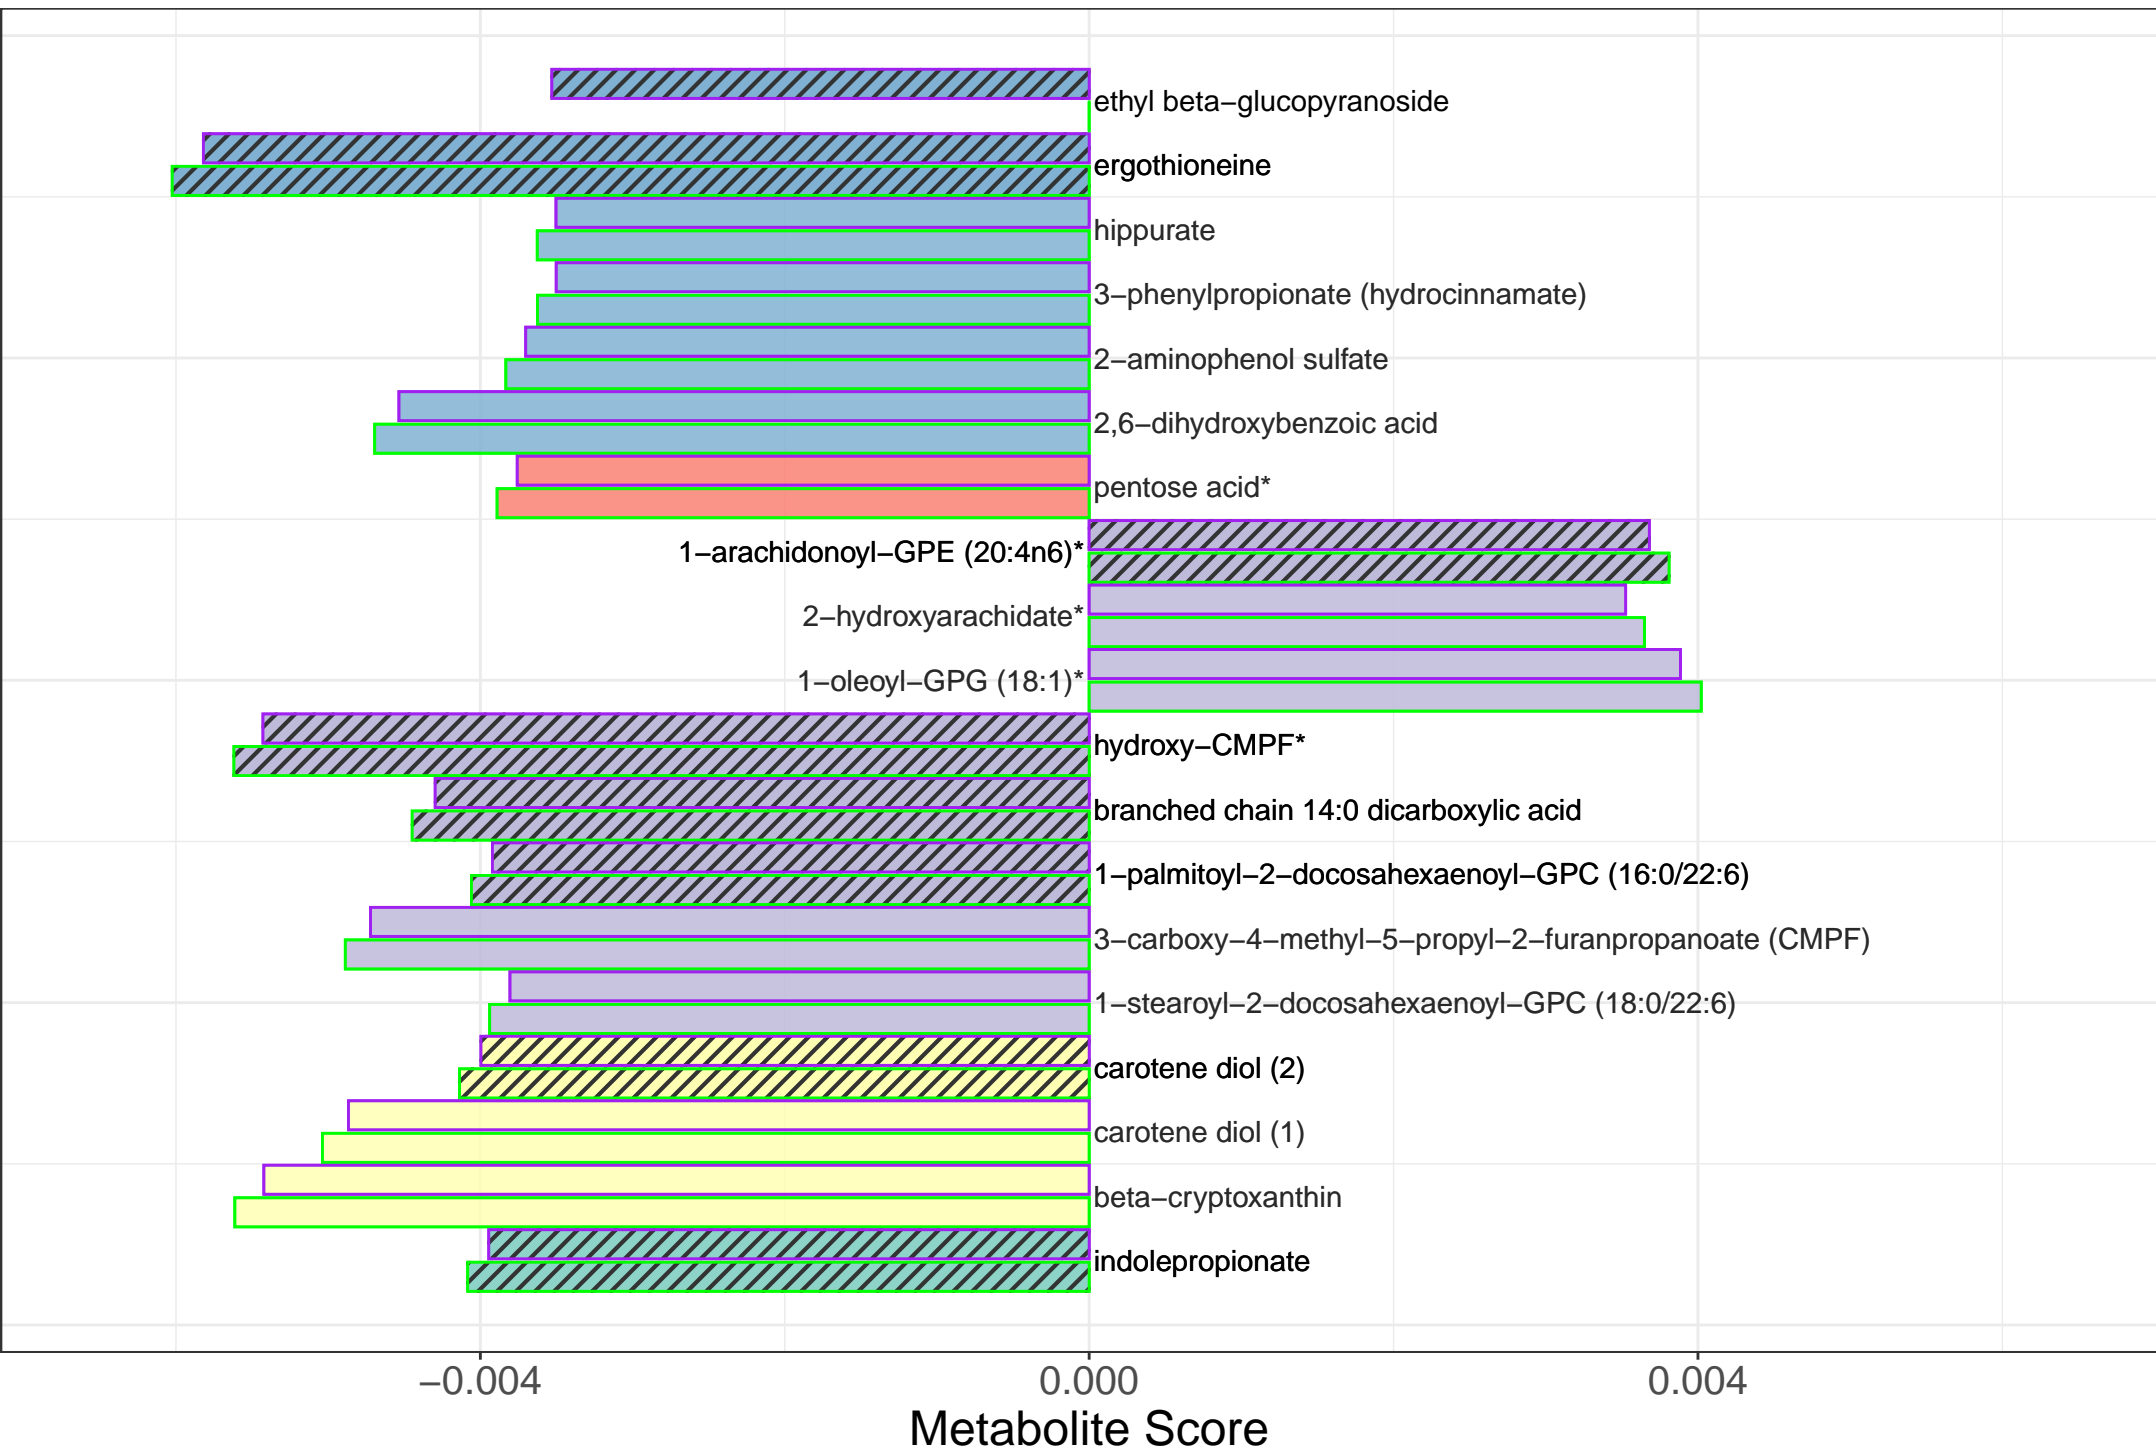

**Supplementary Figure S5.** Metabolites associated with a Western dietary pattern at VDAART gestational timepoints (10-18 weeks and 32-38 weeks), based on models from the COPSAC2010 cohort. The selected metabolite scores are depicted by bars, distinguished by their metabolic pathway. Striped bars indicate metabolites that mediate the association with ADHD Diagnosis in COPSAC2010, while solid bars signify non-mediating metabolites. The directionality of the bars represents the positive or negative metabolite score. Metabolite scores from VDAART are colour-coded for each timepoint: 10-18 weeks (green) and 32-38 weeks (purple).

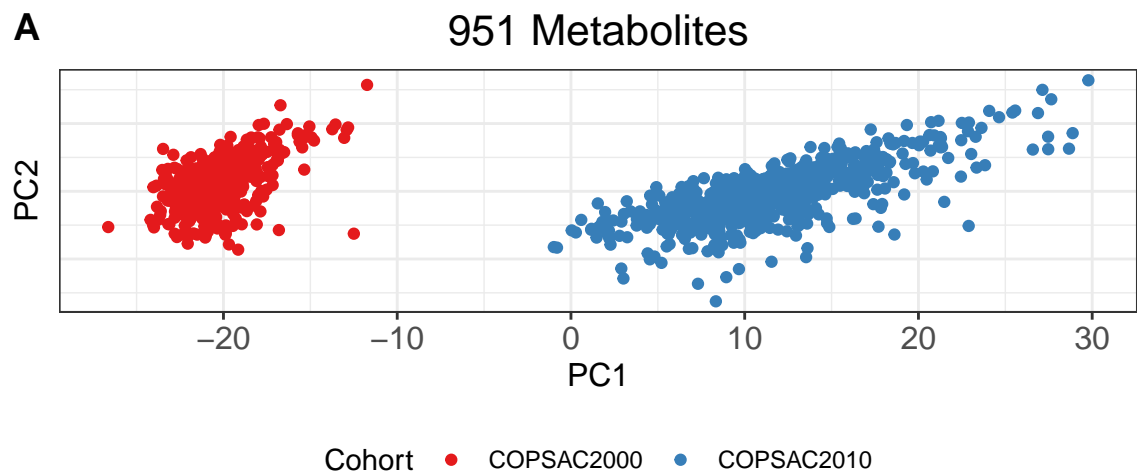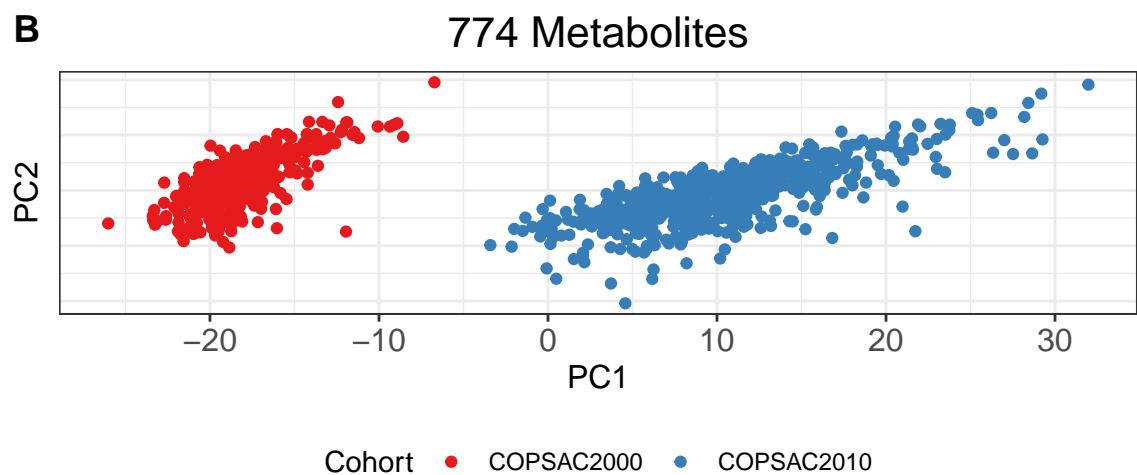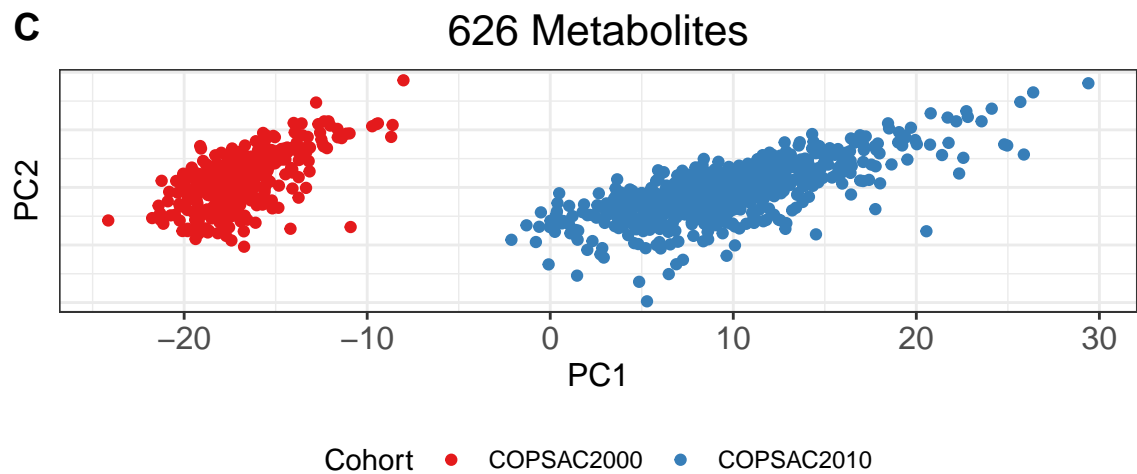

**Supplementary Figure S6.** Comparative analysis of metabolomic data across newborn dry blood spots from the COPSAC2010 and COPSAC2000 mother-child cohorts. Principal Component Analysis (PCA) plots illustrate the distribution and separation of metabolomic data between cohorts. Panels A-C represent overlapping metabolomes used in our analysis (n=951, n=774, n=626), showcasing subsets of metabolites selected based on varying degrees of correlation and distributional similarity between cohorts. **A:** displays the PCA for metabolites with correlations greater than 0.4 (n=951), **B:** Correlations greater than 0.6 (n=774), and **C:** Metabolites with a correlation greater than 0.6 passing the two-sample Kolmogorov-Smirnov test with a threshold of  $\geq 0.05$  (n=626).

# Sex Stratified: Western Dietary Pattern Associations with Neurodevelopmental Disorders

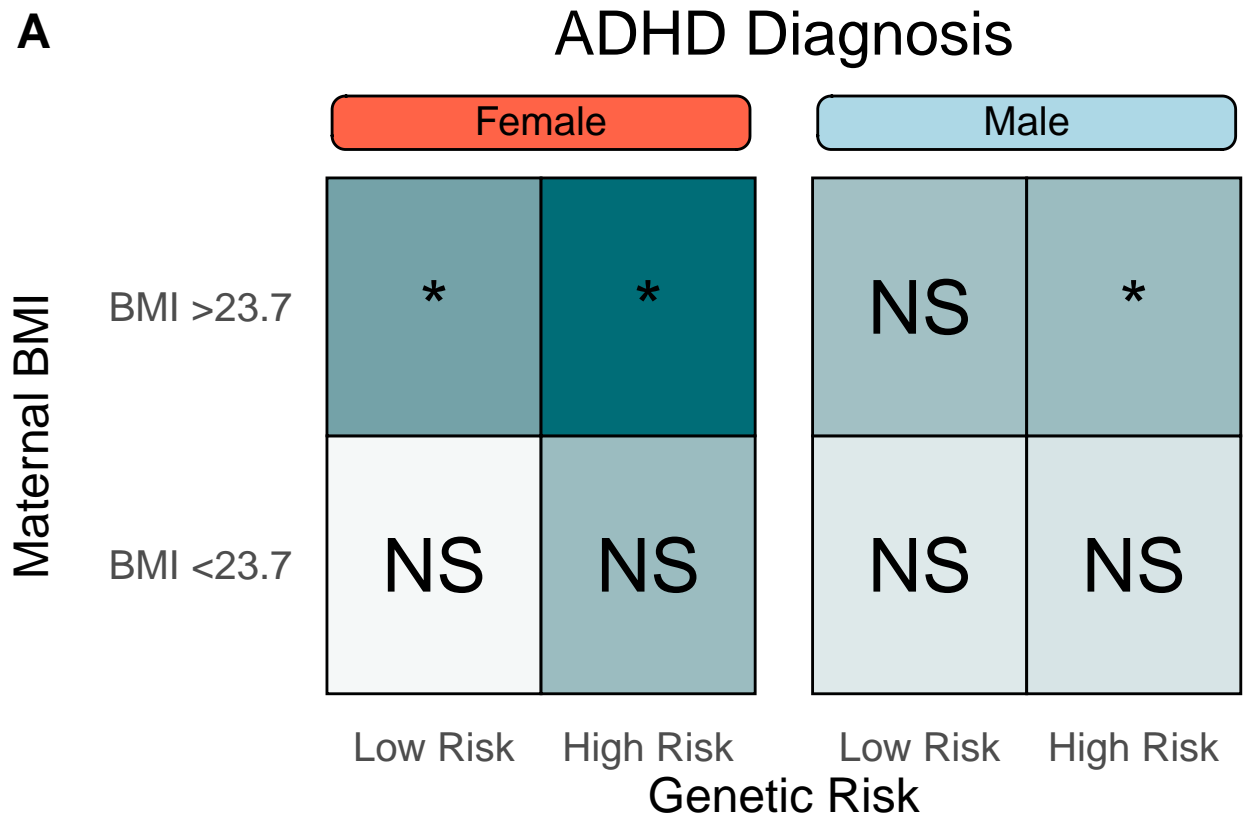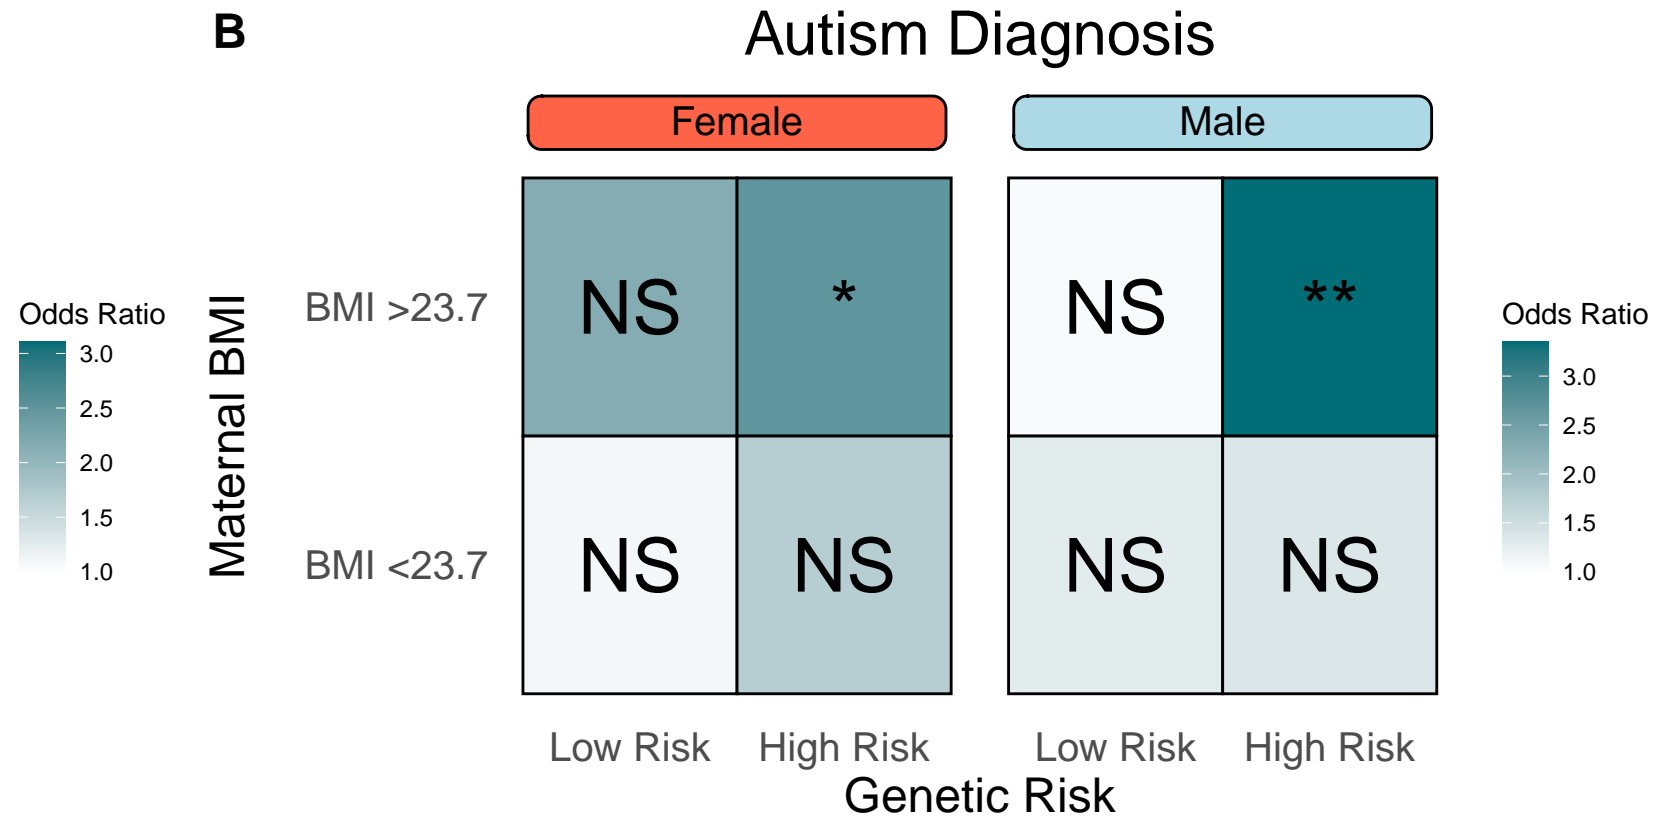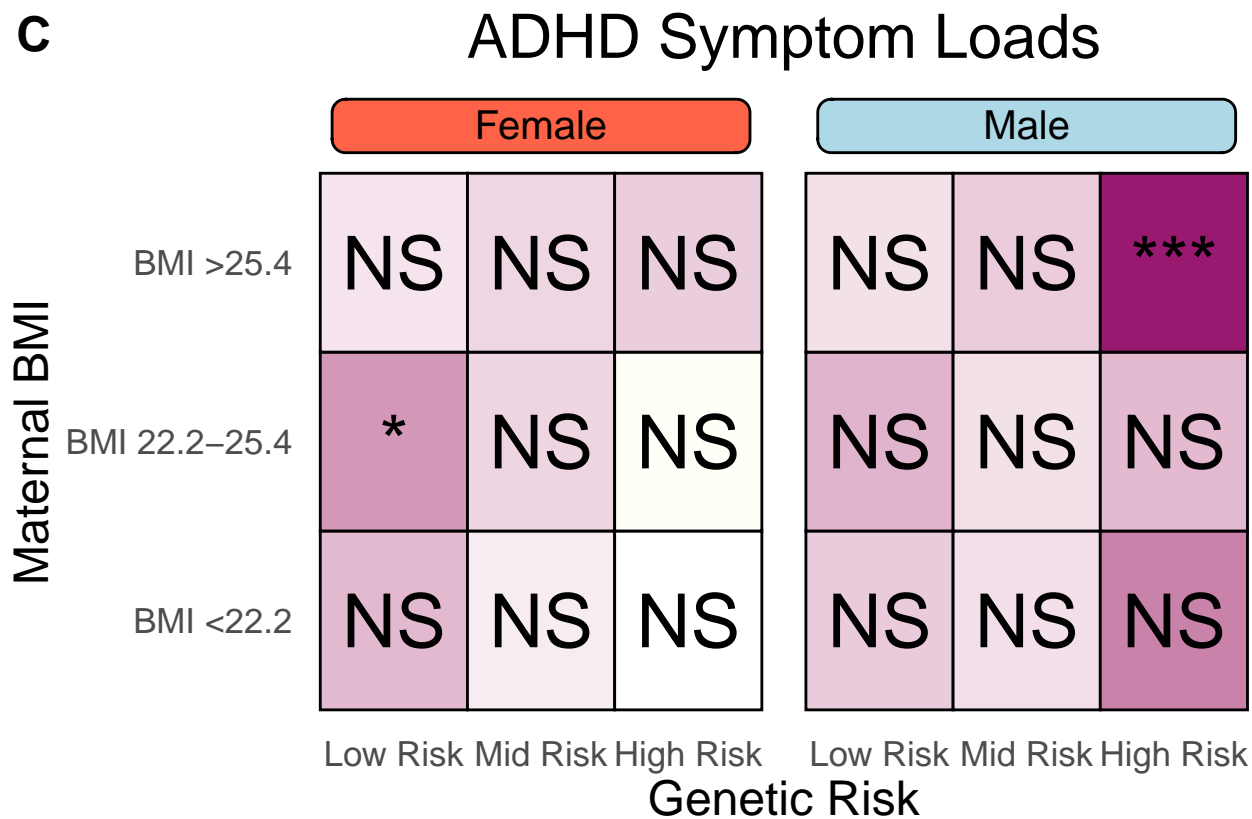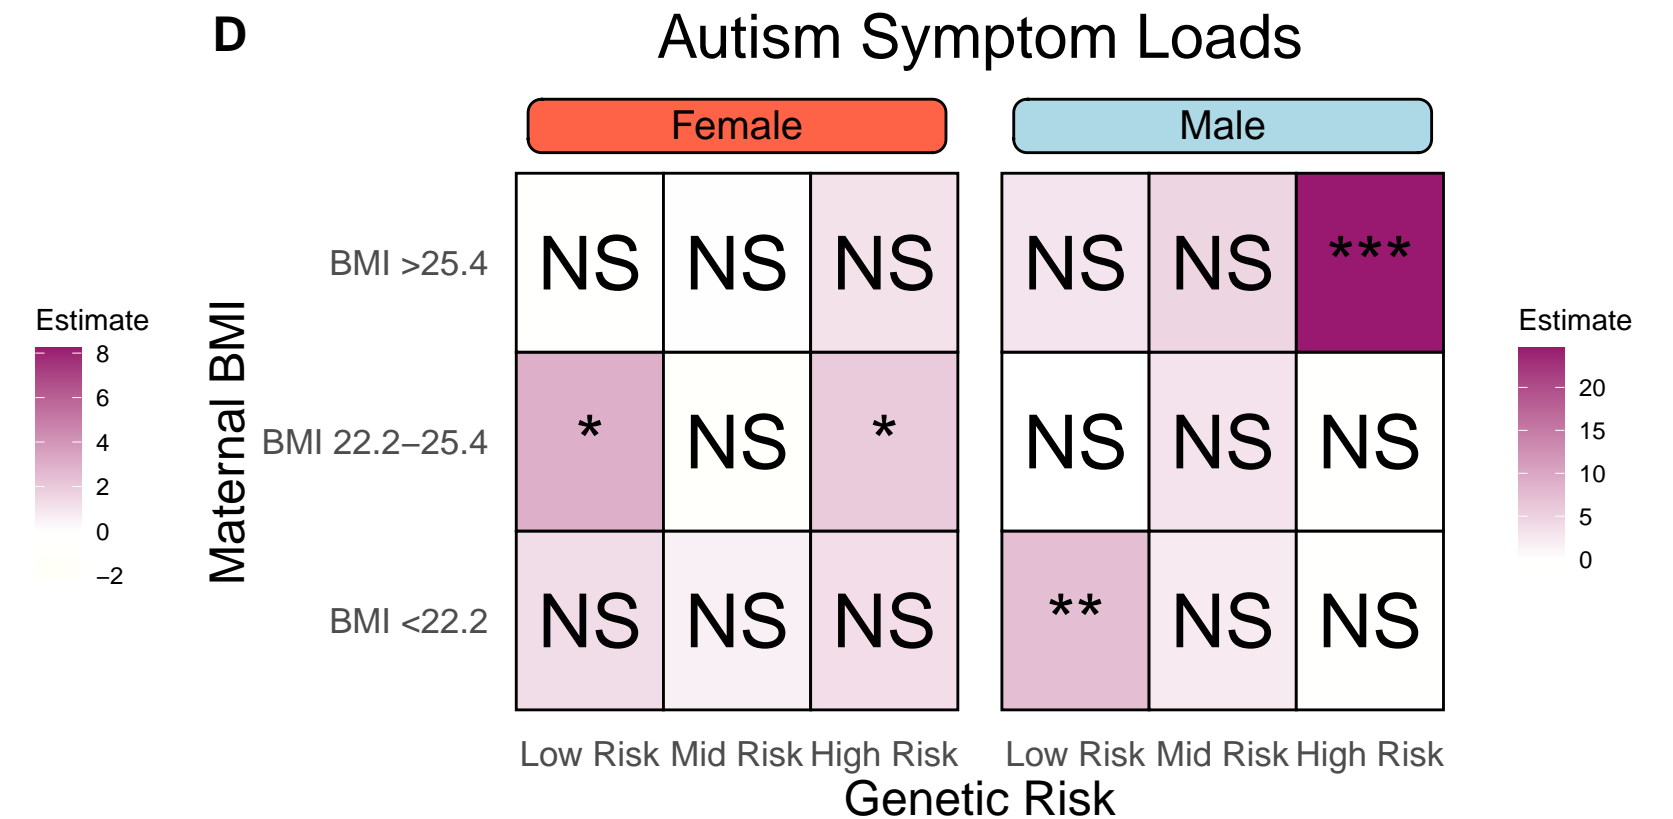

**Supplementary Figure S7.** Modulation of the Western Dietary Pattern, Stratified by Child Sex, on Neurodevelopmental Outcomes. Odds ratio estimates of ADHD (**A**) and autism diagnoses (**B**) based on interactions of the Western dietary pattern, maternal pre-pregnancy BMI (split at median value 23.7), and child's polygenic risk score (PRS) (median split) for ADHD and autism, stratified by child sex. Estimates for ADHD and autism symptom loads based on the Western dietary pattern, considering tertiles of maternal pre-pregnancy BMI (<22.2, 22.2-25.4, >25.4) and child's PRS for ADHD and autism, stratified by child sex. Stars represent significance levels: \* indicates  $p < 0.05$ , \*\* indicates  $p < 0.01$ , and \*\*\* indicates  $p < 0.001$ , with "NS" denoting non-significant results ( $p \geq 0.05$ ). Further details, including the individual associations of these modulating factors, can be found in Table S11.

# Western Dietary Pattern Metabolite Score Associations with Neurodevelopmental Disorders

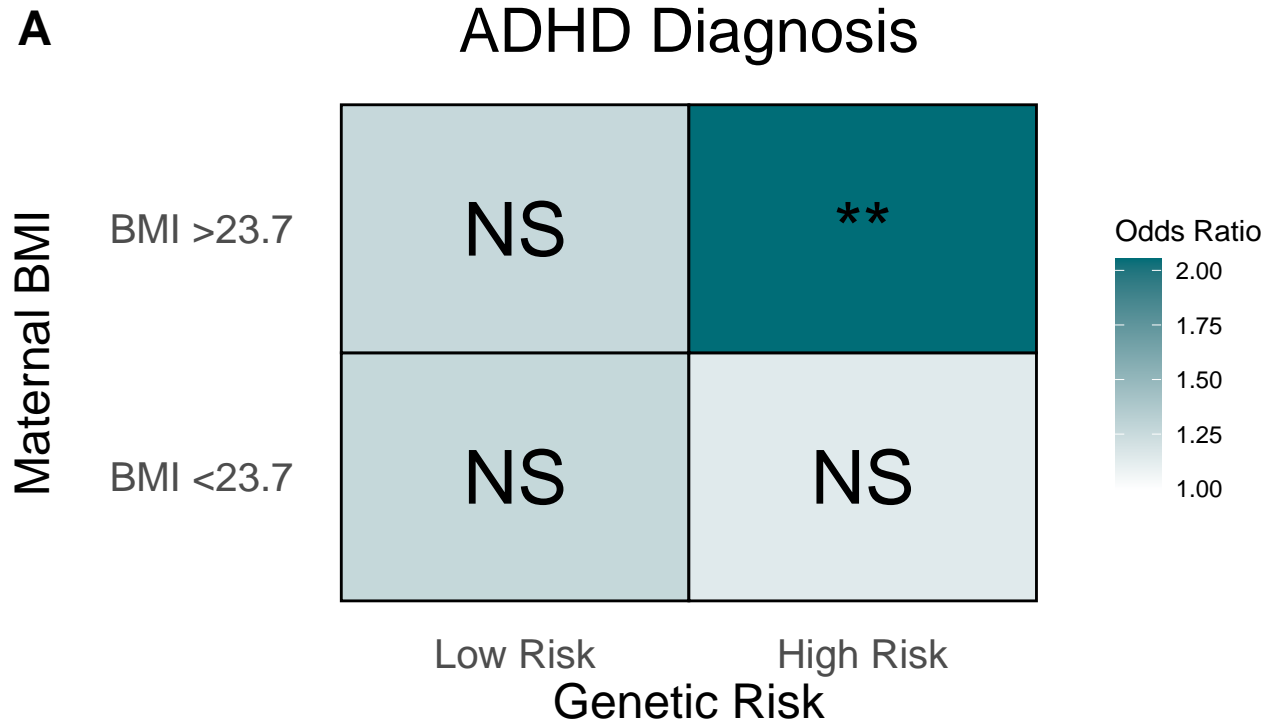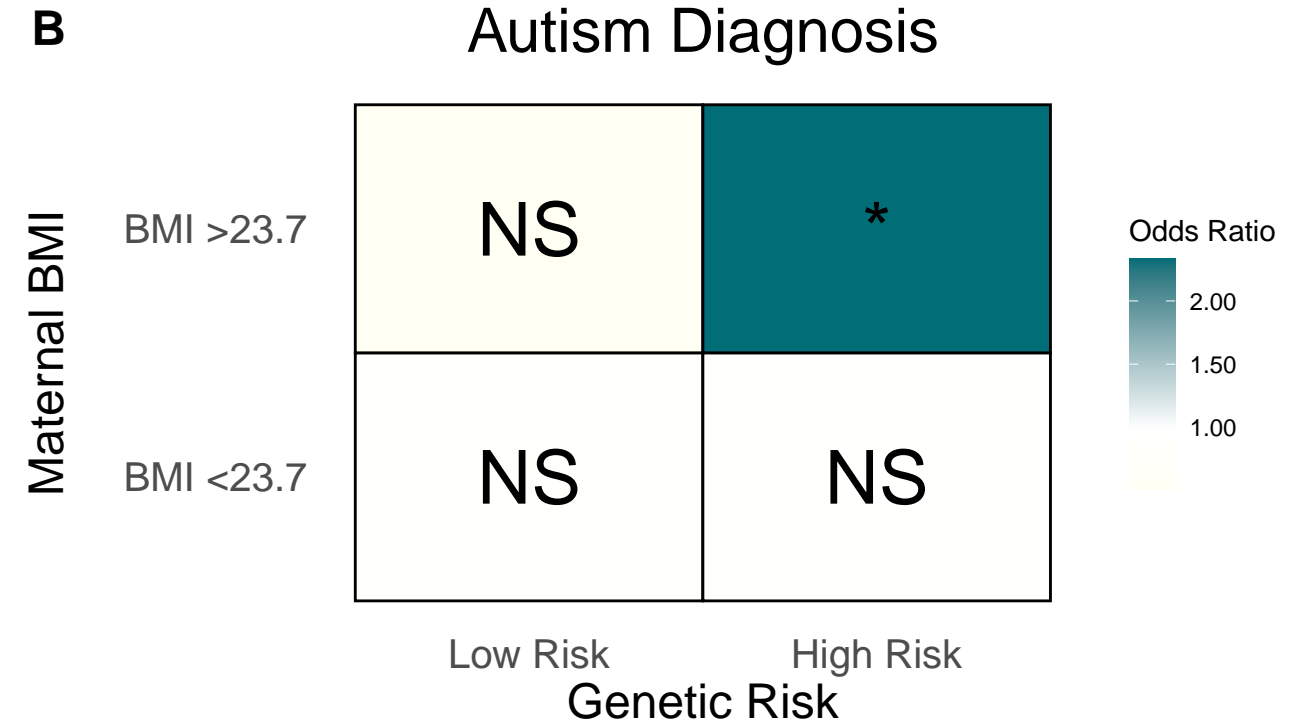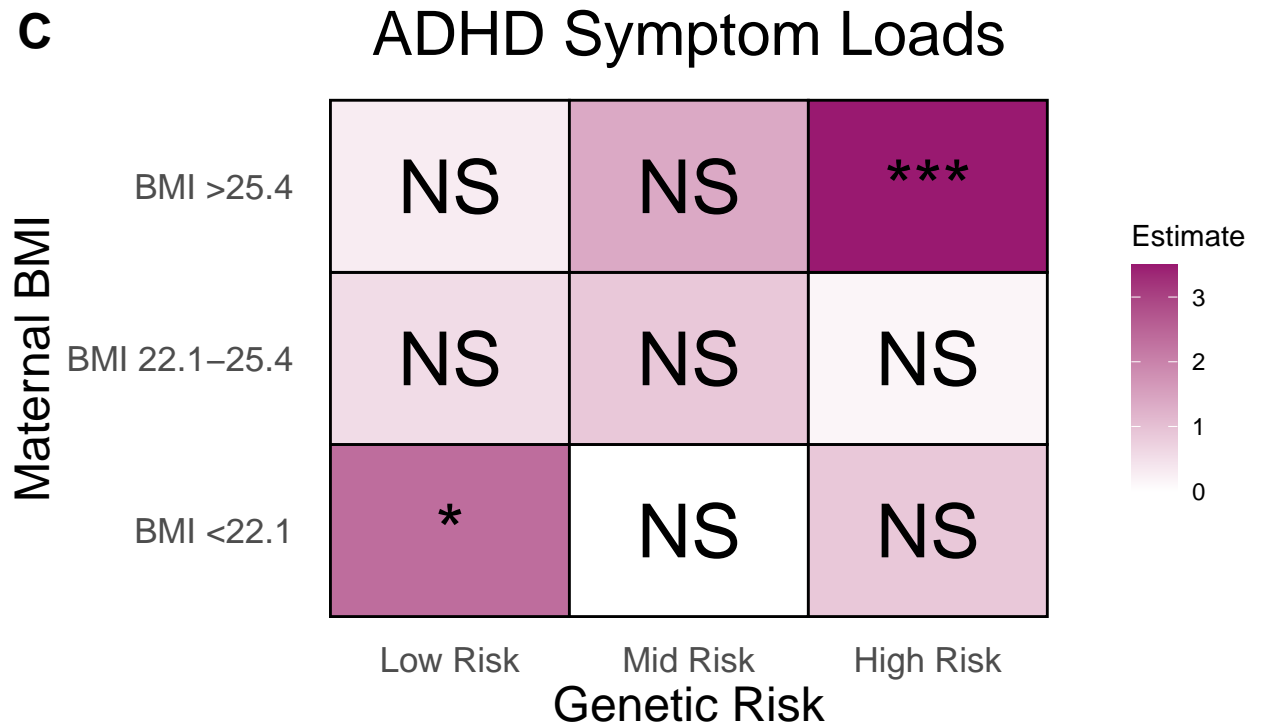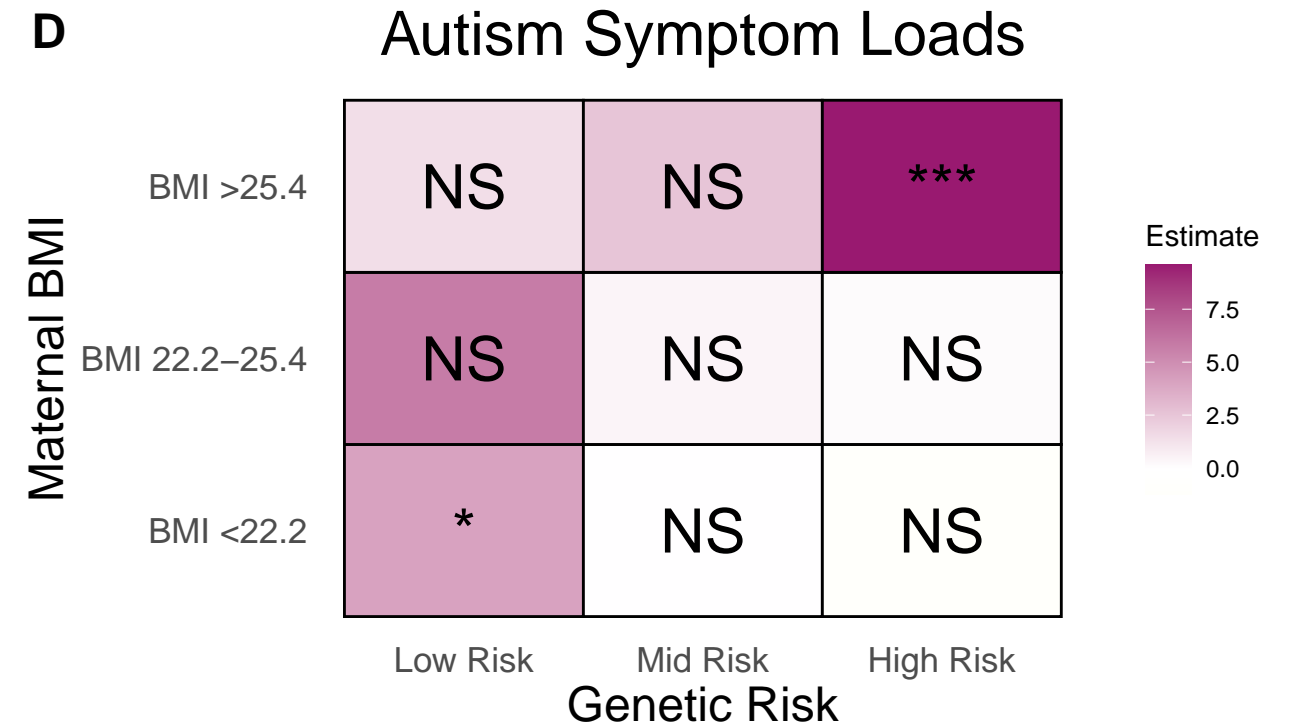



**Supplementary Figure S8.** Modulation of the Western Dietary Pattern Metabolite Score on Neurodevelopmental Outcomes in COPSAC2010 Cohort. Odds ratio estimates for ADHD (A) and autism diagnoses (B) based on interactions of the Western dietary pattern metabolite score, maternal pre-pregnancy BMI (split at median value 23.7), and child's polygenic risk score (PRS) (median split) for ADHD and autism. Estimates for ADHD (C) and autism (D) symptom loads are based on the Western dietary pattern metabolite score, considering tertiles of maternal pre-pregnancy BMI and child's PRS for ADHD and autism. Stars represent significance levels: \* indicates  $p < 0.05$ , \*\* indicates  $p < 0.01$ , and \*\*\* indicates  $p < 0.001$ , with "NS" denoting non-significant results ( $p \geq 0.05$ ). Further details, including the individual associations of these modulating factors, can be found in Table S11.

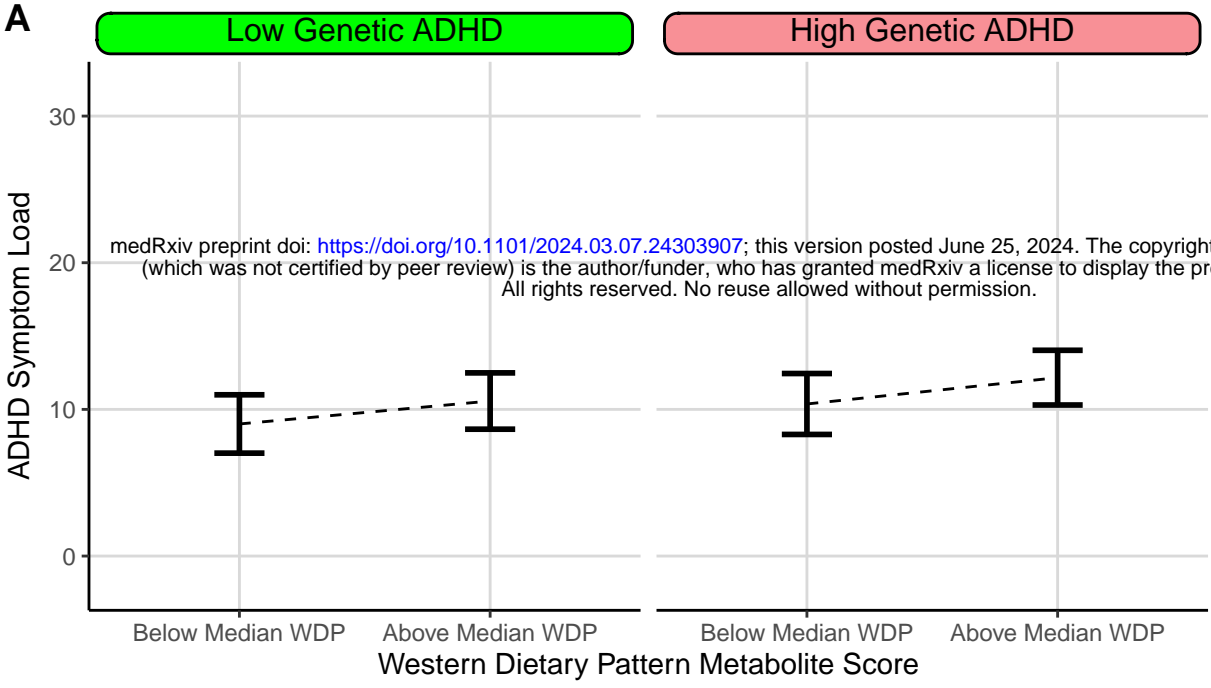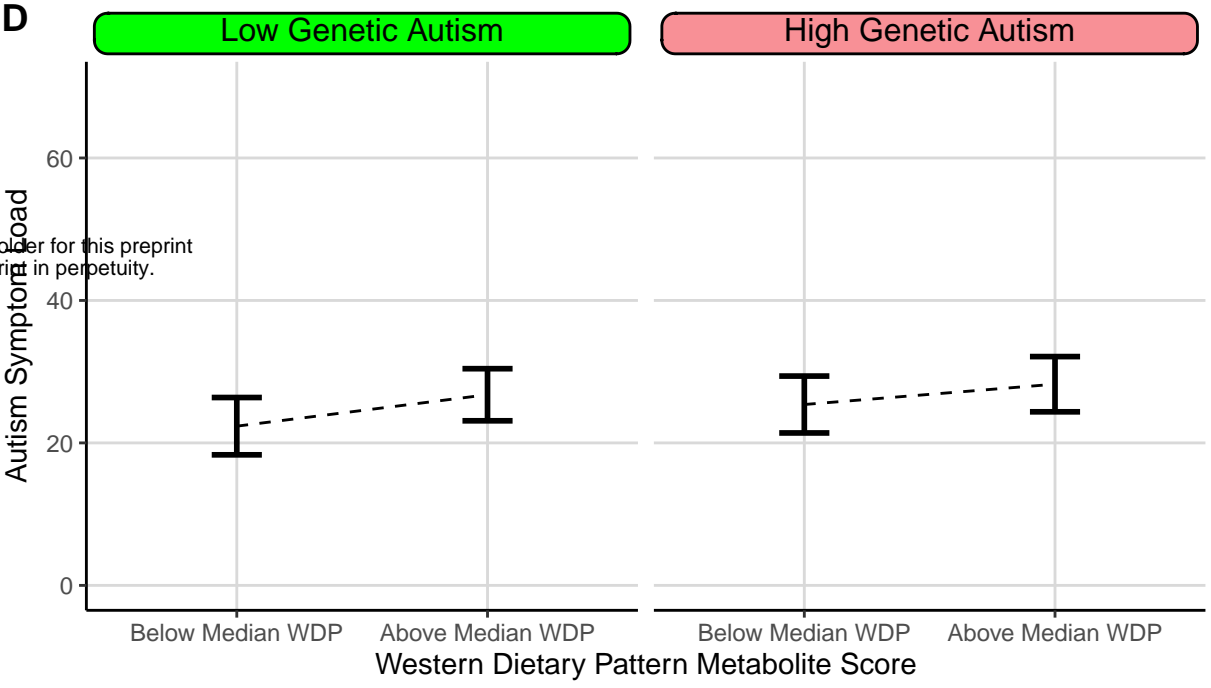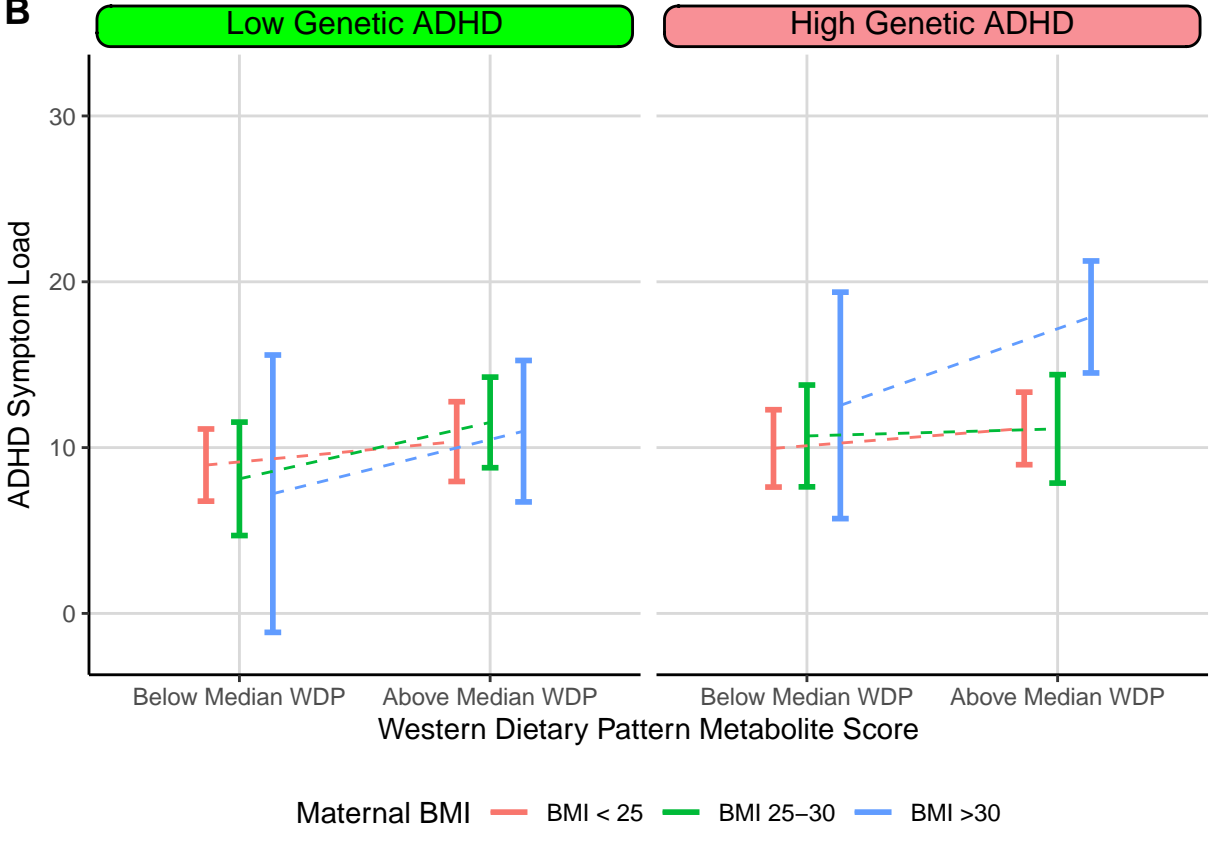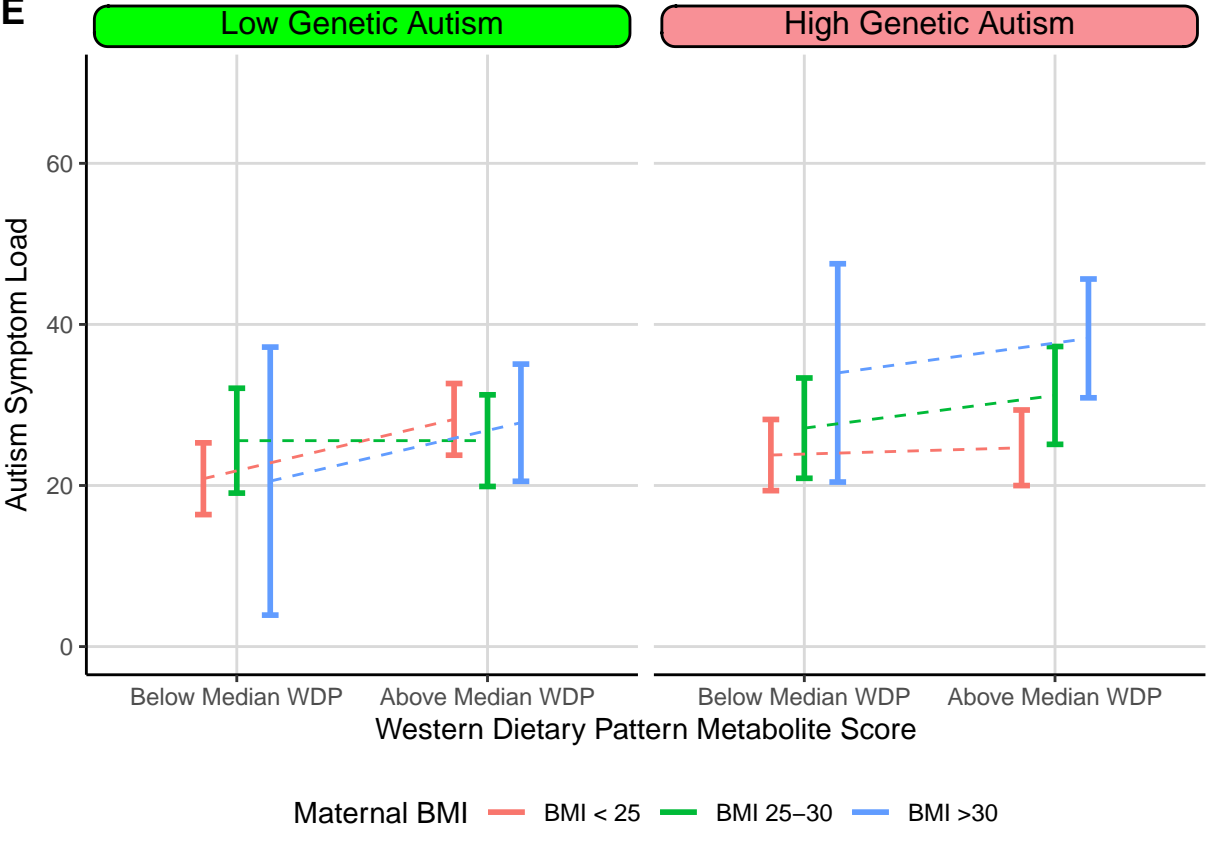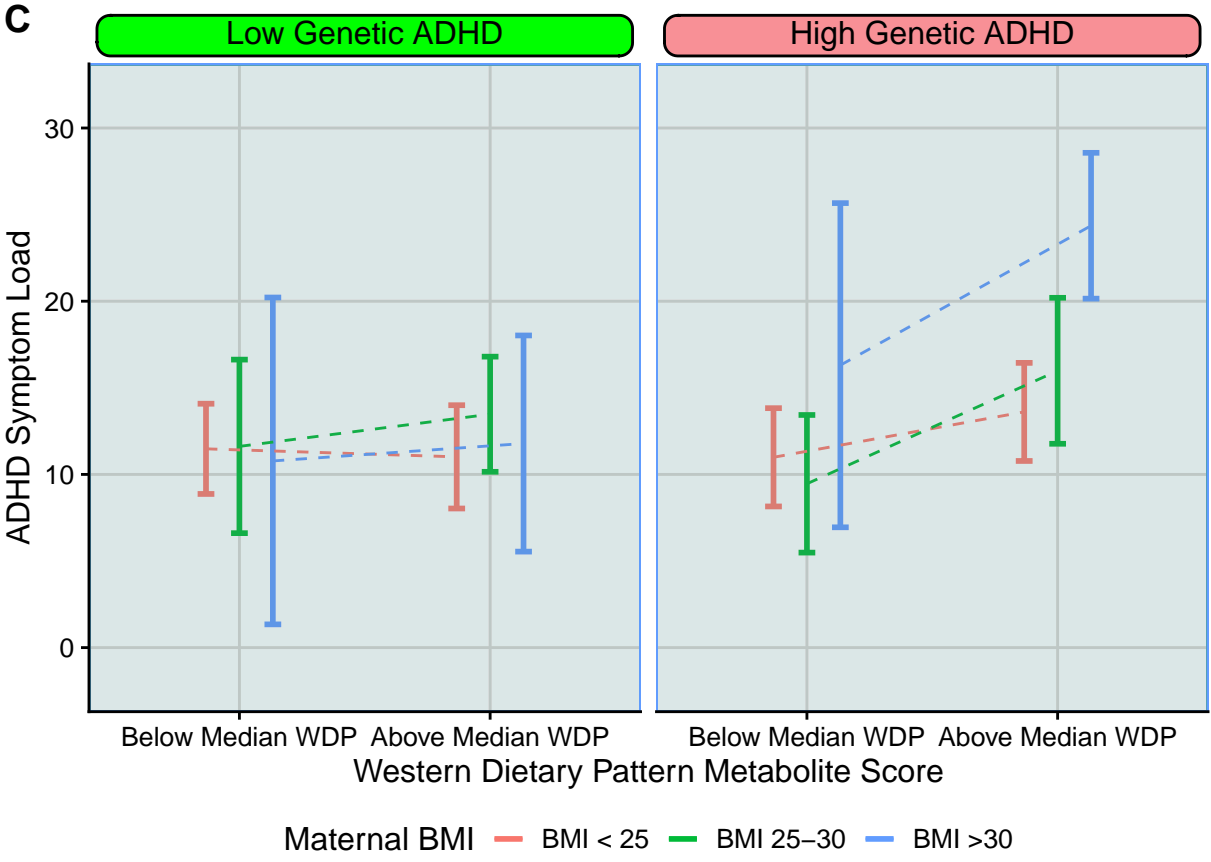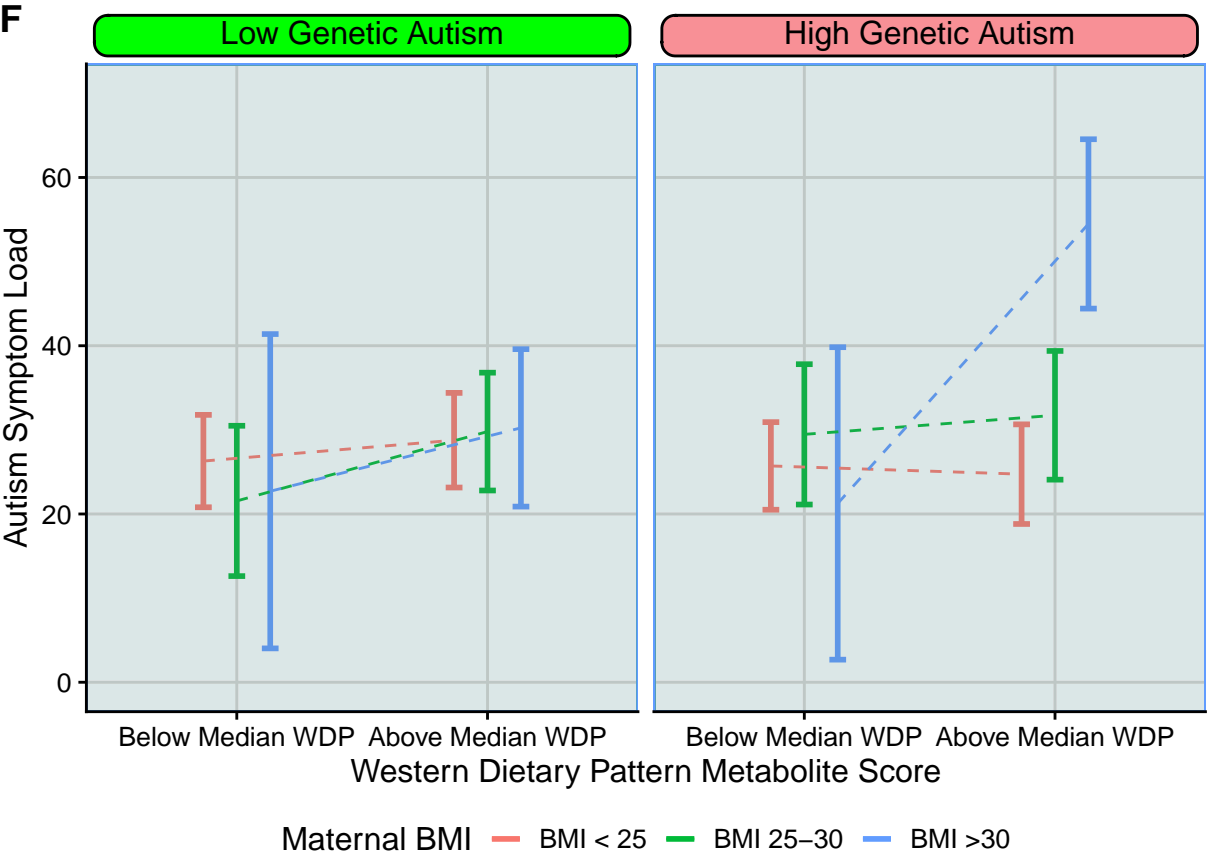

**Supplementary Figure S9.** The Western dietary patterns metabolite scores association with ADHD and autism symptom loads, considering standard clinical classifications of maternal pre-pregnancy BMI. Panels A and D represent ADHD and autism symptom loads respectively, stratified by low/high genetic risk (median cut). Panels B and E further contextualise these associations based on maternal pre-pregnancy BMI categories. Panels C and F again contextualise these associations by stratifying by child sex (male sex shown).

| Cohort Characteristics                                         | Participated | Not Participated |
|----------------------------------------------------------------|--------------|------------------|
| n =                                                            | 600          | 95               |
| Age (mean (SD))                                                | 10.3 (0.4)   | -                |
| Male Sex (%)                                                   | 310 (51.7)   | 47 (49.5)        |
| Caucasian Race (%)                                             | 573 (95.5)   | 93 (97.9)        |
| Income type (%)                                                |              |                  |
| Low (<50,000 euro)                                             | 48 (13.0)    | 12 (18.2)        |
| Medium (50,000 - 110,000 euro)                                 | 114 (31.0)   | 17 (25.8)        |
| High (>110,000 euro)                                           | 206 (56.0)   | 37 (56.1)        |
| Maternal Education Level at Birth                              |              |                  |
| Low (primary, secondary, or college graduate)                  | 46 ( 7.7)    | 5 ( 5.3)         |
| Medium (tradesman or bachelor's degree)                        | 373 (62.2)   | 68 (71.6)        |
| High (Masters degree)                                          | 181 (30.2)   | 22 (23.2)        |
| Maternal age at birth (mean (SD))                              | 32.4 (4.3)   | 31.8 (4.5)       |
| Birthweight (mean (SD))                                        | 3.5 (0.5)    | 3.5 (0.6)        |
| Gestational age (mean (SD))                                    | 279 (12)     | 278 (11)         |
| Cesarean section (%)                                           | 125 (20.8)   | 25 (26.3)        |
| Maternal smoking during pregnancy (%)                          | 44 ( 7.3)    | 10 (10.5)        |
| Solely Breastfed (mean (SD))                                   | 105 (59)     | 94 (65)          |
| Siblings (mean (SD))                                           | 1.6 (0.9)    | 1.6 (0.8)        |
| Pregnancy Western Dietary Pattern (mean (SD))                  | 0.02 (0.99)  | -0.20 (1.04)     |
| Pregnancy Western Dietary Pattern Metabolite Score (mean (SD)) | -0.02 (0.99) | 0.10 (1.04)      |

**Supplementary Table S1.** Cohort characteristics stratified by participation in the COPSAC2010 10 year clinical visit. Low, medium, and high income are defined as <50,000, 50,000 - 110,000, and >110,000 euro respectively. Low, medium and high level educational attainment are defined as “primary, secondary, or college graduate”, “tradesman or bachelor’s degree” and “Masters degree”, respectively.

| Cohort Characteristics                        | Female     | Male       |
|-----------------------------------------------|------------|------------|
| n =                                           | 290        | 310        |
| Age (mean (SD))                               | 10.3 (0.4) | 10.3 (0.3) |
| Caucasian Race (%)                            | 279 (96.2) | 294 (94.8) |
| Income type (%)                               |            |            |
| Low (<50,000 euro)                            | 30 (10.3)  | 18 ( 5.8)  |
| Medium (50,000 - 110,000 euro)                | 152 (52.4) | 168 (54.2) |
| High (>110,000 euro)                          | 108 (37.2) | 124 (40.0) |
| Maternal Education Level at Birth             |            |            |
| Low (primary, secondary, or college graduate) | 24 ( 8.3)  | 22 ( 7.1)  |
| Medium (tradesman or bachelor's degree)       | 172 (59.3) | 201 (64.8) |
| High (Masters degree)                         | 94 (32.4)  | 87 (28.1)  |
| Maternal age at birth (mean (SD))             | 32.4 (4.2) | 32.3 (4.5) |
| Birthweight (mean (SD))                       | 3.5 (0.5)  | 3.6 (0.6)  |
| Gestational age (mean (SD))                   | 280 (10)   | 279 (12)   |
| Cesarean section (%)                          | 54 (18.6)  | 71 (22.9)  |
| Maternal smoking during pregnancy (%)         | 22 ( 7.6)  | 22 ( 7.1)  |
| Solely Breastfed (mean (SD))                  | 106 (59)   | 104 (58)   |
| Siblings (mean (SD))                          | 1.6 (0.9)  | 1.6 (0.8)  |

**Supplementary Table S2.** Cohort characteristics stratified by child sex in COPSYPCH 10 year clinical visit. Low, medium, and high income are defined as <50,000, 50,000 - 110,000, and >110,000 euro, respectively. Low, medium and high level educational attainment are defined as “primary, secondary, or college graduate”, “tradesman or bachelor's degree” and “Masters degree”, respectively.

|                                                                                                                    | Mean (SD)         | PC1 Loadings | PC2 Loadings | Category    |
|--------------------------------------------------------------------------------------------------------------------|-------------------|--------------|--------------|-------------|
| <b>FFQ nutrient constituents</b>                                                                                   | -                 | -            | -            |             |
| Added sugar (g/day) (mean (SD))                                                                                    | 36.04 (26.25)     | 0.033        | 0.123        | Sugars      |
| Dietary fiber (g/day) (mean (SD))                                                                                  | 27.92 (9.76)      | 0.097        | -0.125       | Sugars      |
| Alcohol (g/day) (mean (SD))                                                                                        | 0.41 (0.75)       | 0.015        | 0.013        | Sugars      |
| Ashes (g/day) (mean (SD))                                                                                          | 20.18 (4.99)      | 0.142        | -0.018       | Minerals    |
| Water (g/day) (mean (SD))                                                                                          | 2817.43 (740.48)  | 0.085        | -0.072       | Minerals    |
| Vitamin A (RE/day) (mean (SD))                                                                                     | 824.74 (368.58)   | 0.085        | 0.01         | Vitamins    |
| Retinol (µg/day) (mean (SD))                                                                                       | 490.63 (241.14)   | 0.085        | 0.134        | Vitamins    |
| Betacarotene (µg/day) (mean (SD))                                                                                  | 3958.40 (3258.49) | 0.038        | -0.106       | Vitamins    |
| Vitamin D (µg/day) (mean (SD))                                                                                     | 4.86 (2.81)       | 0.071        | -0.087       | Vitamins    |
| Vitamin D3 (cholecalciferol) (µg/day) (mean (SD))                                                                  | 1.11 (0.70)       | 0.08         | -0.03        | Vitamins    |
| 25-hydroxycholecalciferol - a metabolically activated form of cholecalciferol<br>(Vitamin D3) (µg/day) (mean (SD)) | 0.03 (0.02)       | 0.048        | 0.086        | Vitamins    |
| Vitamin E (a-TE/day) (mean (SD))                                                                                   | 7.93 (2.95)       | 0.099        | -0.045       | Vitamins    |
| Alphatocoferol (mg/day) (mean (SD))                                                                                | 7.30 (2.82)       | 0.097        | -0.044       | Vitamins    |
| Vitamin K (µg/day) (mean (SD))                                                                                     | 86.50 (53.03)     | 0.052        | -0.102       | Vitamins    |
| Vitamin B1 (thiamin) (mg/day) (mean (SD))                                                                          | 1.39 (0.38)       | 0.13         | -0.063       | Vitamins    |
| Vitamin B2 (riboflavin) (mg/day) (mean (SD))                                                                       | 1.86 (0.66)       | 0.115        | 0.002        | Vitamins    |
| Niacin equivalent (NE/day) (mean (SD))                                                                             | 26.45 (6.40)      | 0.142        | -0.045       | Vitamins    |
| Niacin (mg/day) (mean (SD))                                                                                        | 14.49 (3.72)      | 0.126        | -0.074       | Vitamins    |
| Tryptophan (mg/day) (mean (SD))                                                                                    | 14.68 (4.00)      | 0.138        | -0.004       | Amino Acids |
| Vitamin B6 (mg/day) (mean (SD))                                                                                    | 1.61 (0.42)       | 0.135        | -0.111       | Vitamins    |

|                                             |                  |       |        |          |
|---------------------------------------------|------------------|-------|--------|----------|
| Pantothenic acid (mg/day) (mean (SD))       | 6.24 (1.73)      | 0.134 | -0.049 | Vitamins |
| Biotin (µg/day) (mean (SD))                 | 42.94 (13.22)    | 0.128 | -0.068 | Vitamins |
| Folate (µg/day) (mean (SD))                 | 344.59 (101.24)  | 0.115 | -0.108 | Vitamins |
| Vitamin B12 (µg/day) (mean (SD))            | 5.64 (2.14)      | 0.116 | -0.017 | Vitamins |
| Vitamin C (mg/day) (mean (SD))              | 140.14 (71.37)   | 0.061 | -0.138 | Vitamins |
| L-ascorbic acid (mg/day) (mean (SD))        | 136.31 (65.88)   | 0.063 | -0.14  | Vitamins |
| L-dehydroascorbic acid (mg/day) (mean (SD)) | 13.79 (7.42)     | 0.05  | -0.115 | Vitamins |
| Sodium (mg/day) (mean (SD))                 | 2956.73 (813.05) | 0.124 | 0.043  | Minerals |
| Potassium (mg/day) (mean (SD))              | 3584.14 (941.59) | 0.131 | -0.083 | Minerals |
| Calcium (mg/day) (mean (SD))                | 1237.53 (454.19) | 0.103 | 0.005  | Minerals |
| Magnesium (mg/day) (mean (SD))              | 399.47 (108.31)  | 0.126 | -0.106 | Minerals |
| Phosphor (mg/day) (mean (SD))               | 1654.26 (460.76) | 0.135 | -0.03  | Minerals |
| Iron (mg/day) (mean (SD))                   | 11.22 (2.89)     | 0.124 | -0.074 | Minerals |
| Copper (mg/day) (mean (SD))                 | 4.88 (1.52)      | 0.055 | -0.095 | Minerals |
| Zink (mg/day) (mean (SD))                   | 12.01 (2.98)     | 0.141 | -0.03  | Minerals |
| Iodine (µg/day) (mean (SD))                 | 302.03 (120.03)  | 0.092 | -0.02  | Minerals |
| Manganese (mg/day) (mean (SD))              | 5.23 (2.06)      | 0.09  | -0.122 | Minerals |
| Chromium (µg/day) (mean (SD))               | 32.41 (10.28)    | 0.107 | -0.058 | Minerals |
| Selenium (µg/day) (mean (SD))               | 47.23 (12.57)    | 0.137 | -0.052 | Minerals |
| Nickel (µg/day) (mean (SD))                 | 149.55 (52.65)   | 0.088 | -0.115 | Minerals |
| Fructose (g/day) (mean (SD))                | 13.72 (6.81)     | 0.05  | -0.158 | Sugars   |
| Glucose (g/day) (mean (SD))                 | 12.98 (6.50)     | 0.052 | -0.135 | Sugars   |
| Lactose (g/day) (mean (SD))                 | 23.29 (15.87)    | 0.073 | 0.028  | Sugars   |
| Maltose (g/day) (mean (SD))                 | 2.26 (1.19)      | 0.056 | 0.01   | Sugars   |

|                                                                   |               |       |        |             |
|-------------------------------------------------------------------|---------------|-------|--------|-------------|
| Sucrose (g/day) (mean (SD))                                       | 27.99 (12.07) | 0.056 | -0.01  | Sugars      |
| Starch (g/day) (mean (SD))                                        | 99.95 (35.10) | 0.09  | -0.022 | Sugars      |
| C4:0 (Butyric acid, Butanoic acid) (g/day) (mean (SD))            | 0.97 (0.54)   | 0.081 | 0.244  | Fatty Acids |
| C6:0 (Caproic acid, Hexanoic acid) (g/day) (mean (SD))            | 1.01 (0.58)   | 0.079 | 0.243  | Fatty Acids |
| C8:0 (Caprylic acid, Octanoic acid) (g/day) (mean (SD))           | 0.57 (0.33)   | 0.079 | 0.232  | Fatty Acids |
| C10:0 (Capric acid, Decanoic acid) (g/day) (mean (SD))            | 0.84 (0.46)   | 0.082 | 0.243  | Fatty Acids |
| C12:0 (Lauric acid, Dodecanoic acid) (g/day) (mean (SD))          | 1.26 (0.54)   | 0.093 | 0.215  | Fatty Acids |
| C14:0 (Myristic acid, Tetradecanoic acid) (g/day) (mean (SD))     | 3.17 (1.44)   | 0.09  | 0.233  | Fatty Acids |
| C15:0 (Pentadecylic acid, Pentadecanoic acid) (g/day) (mean (SD)) | 0.01 (0.01)   | 0.041 | -0.018 | Fatty Acids |
| C16:0 (Palmitic acid, Hexadecanoic acid) (g/day) (mean (SD))      | 15.63 (5.31)  | 0.106 | 0.202  | Fatty Acids |
| C17:0 (Margaric acid, Heptadecanoic acid) (g/day) (mean (SD))     | 0.02 (0.01)   | 0.043 | -0.006 | Fatty Acids |
| C18:0 (Stearic acid, Octadecanoic acid) (g/day) (mean (SD))       | 6.70 (2.56)   | 0.095 | 0.195  | Fatty Acids |
| C20:0 (Arachidic acid, Eicosanoic acid) (g/day) (mean (SD))       | 0.11 (0.06)   | 0.08  | 0.154  | Fatty Acids |
| C22:0 (Behenic acid, Docosanoic acid) (g/day) (mean (SD))         | 0.05 (0.04)   | 0.046 | 0.01   | Fatty Acids |
| C24:0 (Lignoceric acid, Tetracosanoic acid) (g/day) (mean (SD))   | 0.03 (0.03)   | 0.039 | -0.091 | Fatty Acids |
| C14:1, n-5 (Myristoleic acid) (g/day) (mean (SD))                 | 0.37 (0.17)   | 0.083 | 0.231  | Fatty Acids |
| C16:1, n-7 (Palmitoleic acid) (g/day) (mean (SD))                 | 1.27 (0.38)   | 0.11  | 0.144  | Fatty Acids |
| C18:1, n-9 (Oleic acid, Elaidic acid) (g/day) (mean (SD))         | 22.76 (7.61)  | 0.112 | 0.125  | Fatty Acids |
| C18:1, n-7 (Vaccenic acid) (g/day) (mean (SD))                    | 0.12 (0.05)   | 0.089 | -0.049 | Fatty Acids |
| C20:1, n-11 (Gadoleic acid) (g/day) (mean (SD))                   | 0.52 (0.21)   | 0.105 | 0.113  | Fatty Acids |
| C22:1, n-9 (Erucic acid) (g/day) (mean (SD))                      | 0.02 (0.04)   | 0.028 | -0.041 | Fatty Acids |
| C22:1, n-11 (Cetoleic acid) (g/day) (mean (SD))                   | 0.14 (0.17)   | 0.05  | -0.063 | Fatty Acids |
| C24:1, n-9 (Nervonic acid) (g/day) (mean (SD))                    | 0.02 (0.02)   | 0.061 | -0.09  | Fatty Acids |
| C18:2, n-6 (Linoleic acid) (g/day) (mean (SD))                    | 9.44 (3.25)   | 0.108 | -0.019 | Fatty Acids |



|                                                                               |                    |       |        |             |
|-------------------------------------------------------------------------------|--------------------|-------|--------|-------------|
| C18:3, n-3 (Alpha-linolenic acid ALA) (g/day) (mean (SD))                     | 1.92 (0.72)        | 0.107 | 0.018  | Fatty Acids |
| C18:4, n-3 (Stearidonic acid SDA, Moroctic acid) (g/day) (mean (SD))          | 0.05 (0.05)        | 0.057 | -0.08  | Fatty Acids |
| C20:4, n-6 (Arachidonic acid AA) (g/day) (mean (SD))                          | 0.05 (0.02)        | 0.074 | -0.026 | Fatty Acids |
| C20:5, n-3 (Eicosapentaenoic acid EPA, Timnodonic acid) (g/day) (mean (SD))   | 0.15 (0.11)        | 0.064 | -0.117 | Fatty Acids |
| C22:5, n-3 (Docosapentaenoic acid DPA, Clupanodonic acid) (g/day) (mean (SD)) | 0.04 (0.03)        | 0.063 | -0.097 | Fatty Acids |
| C22:6, n-3 (Docosahexaenoic acid DHA, Cervonic acid) (g/day) (mean (SD))      | 0.36 (0.24)        | 0.069 | -0.102 | Fatty Acids |
| Other fatty acids (g/day) (mean (SD))                                         | 0.17 (0.07)        | 0.087 | -0.073 | Fatty Acids |
| Trans fatty acids, total (g/day) (mean (SD))                                  | 1.61 (0.78)        | 0.084 | 0.24   | Fatty Acids |
| Cholesterol (mg/day) (mean (SD))                                              | 306.56 (111.46)    | 0.104 | 0.143  | Fatty Acids |
| Isoleucine (mg/day) (mean (SD))                                               | 3257.44 (895.38)   | 0.137 | 0.009  | Amino Acids |
| Leucine (mg/day) (mean (SD))                                                  | 5356.46 (1490.08)  | 0.136 | 0.011  | Amino Acids |
| Lysine (mg/day) (mean (SD))                                                   | 4771.66 (1352.94)  | 0.131 | 0.006  | Amino Acids |
| Methionine (mg/day) (mean (SD))                                               | 1552.75 (421.81)   | 0.136 | 0.007  | Amino Acids |
| Cystine (mg/day) (mean (SD))                                                  | 667.43 (183.60)    | 0.134 | -0.028 | Amino Acids |
| Phenylalanine (mg/day) (mean (SD))                                            | 3059.71 (833.10)   | 0.138 | 0.004  | Amino Acids |
| Tyrosine (mg/day) (mean (SD))                                                 | 2295.78 (659.79)   | 0.133 | 0.014  | Amino Acids |
| Threonine (mg/day) (mean (SD))                                                | 2615.14 (699.25)   | 0.139 | -0.002 | Amino Acids |
| Tryptophan (mg/day) (mean (SD))                                               | 802.48 (216.52)    | 0.138 | 0.004  | Amino Acids |
| Valine (mg/day) (mean (SD))                                                   | 4098.35 (1106.25)  | 0.138 | 0.005  | Amino Acids |
| Arginine (mg/day) (mean (SD))                                                 | 3814.66 (954.91)   | 0.138 | -0.049 | Amino Acids |
| Histidine (mg/day) (mean (SD))                                                | 1923.77 (502.98)   | 0.139 | 0.008  | Amino Acids |
| Alanine (mg/day) (mean (SD))                                                  | 3404.72 (833.44)   | 0.141 | -0.023 | Amino Acids |
| Asparagine acid (mg/day) (mean (SD))                                          | 6346.65 (1582.54)  | 0.141 | -0.021 | Amino Acids |
| Glutamic acid (mg/day) (mean (SD))                                            | 12803.38 (3446.26) | 0.137 | 0.015  | Amino Acids |

|                              |                   |       |        |             |
|------------------------------|-------------------|-------|--------|-------------|
| Glycine (mg/day) (mean (SD)) | 2919.02 (713.39)  | 0.136 | -0.023 | Amino Acids |
| Proline (mg/day) (mean (SD)) | 4841.23 (1437.50) | 0.13  | 0.031  | Amino Acids |
| Serine (mg/day) (mean (SD))  | 3421.27 (925.75)  | 0.139 | 0.007  | Amino Acids |

**Supplementary Table S3.** Descriptive summary statistics for nutrients derived from maternal food frequency questionnaires in pregnancy and principal component loadings for principal component 1 and 2 in the COPSAC2010 cohort.

| Supplement Intake at 24 Weeks Gestation                    | Mean (SD)       | Taking Supplement |
|------------------------------------------------------------|-----------------|-------------------|
| <b>Vitamins</b>                                            | -               | -                 |
| Vitamin A (µg) (mean (SD))                                 | 446.75 (256.98) | 447               |
| Vitamin B1, Thiamin (mg) (mean (SD))                       | 2.23 (13.57)    | 449               |
| Vitamin B2, Riboflavin (mg) (mean (SD))                    | 1.73 (2.11)     | 449               |
| Vitamin B6 (mg) (mean (SD))                                | 2.24 (5.37)     | 449               |
| Vitamin B12 (µg) (mean (SD))                               | 2.06 (1.43)     | 446               |
| Folic acid (µg) (mean (SD))                                | 326.82 (161.14) | 447               |
| Dietary folate equivalents (µg) (mean (SD))                | 653.65 (322.28) | 447               |
| Niacin (mg) (mean (SD))                                    | 16.22 (10.20)   | 447               |
| Pantothenic acid (mg) (mean (SD))                          | 6.20 (4.64)     | 447               |
| Biotin (µg) (mean (SD))                                    | 17.75 (36.49)   | 142               |
| Vitamin C (mg) (mean (SD))                                 | 92.96 (73.19)   | 462               |
| Vitamin D (µg) (mean (SD))                                 | 10.50 (7.20)    | 459               |
| Vitamin E (mg) (mean (SD))                                 | 11.57 (14.91)   | 448               |
| Vitamin K (µg) (mean (SD))                                 | 48.93 (47.54)   | 277               |
| <b>Minerals</b>                                            | -               | -                 |
| Calcium (mg) (mean (SD))                                   | 210.48 (320.68) | 208               |
| Phosphorus (mean (SD))                                     | 2.94 (63.13)    | 2                 |
| Magnesium (mg) (mean (SD))                                 | 97.93 (102.28)  | 420               |
| Iron (mg) (mean (SD))                                      | 55.39 (32.18)   | 470               |
| Zinc (mg) (mean (SD))                                      | 7.84 (4.40)     | 446               |
| Copper (mg) (mean (SD))                                    | 0.96 (0.48)     | 444               |
| Iodine (µg) (mean (SD))                                    | 144.43 (70.80)  | 429               |
| Manganese (mg) (mean (SD))                                 | 1.82 (0.89)     | 445               |
| Chromium (µg) (mean (SD))                                  | 29.73 (17.09)   | 446               |
| Selenium (µg) (mean (SD))                                  | 48.55 (22.60)   | 446               |
| Molybdenum (mcg) (mean (SD))                               | 22.93 (33.29)   | 188               |
| <b>Fatty Acids</b>                                         | -               | -                 |
| n3-long chain polyunsaturated fatty acids (mg) (mean (SD)) | 48.50 (376.96)  | 29                |
| n6-long chain polyunsaturated fatty acids (mg) (mean (SD)) | 0.46 (9.98)     | 2                 |
| n9-long chain polyunsaturated fatty acids (mg) (mean (SD)) | 0.50 (10.87)    | 2                 |
| Fish oil (mg) (mean (SD))                                  | 83.74 (601.47)  | 31                |
| EPA (mg) (mean (SD))                                       | 25.34 (189.57)  | 34                |
| DHA (mg)(mean (SD))                                        | 17.80 (125.25)  | 34                |

**Supplementary Table S4.** Daily estimated intake of prenatal supplements assessed at 24 weeks gestation, with 1 month recall, including vitamins, minerals, and fatty acids, with mean (SD) values and number of participants taking each supplement.

|                                             | <b>Model 1<br/>n3-LCPUFA</b>           | <b>Model 2<br/>D vitamin</b>           | <b>Model 3<br/>Prenatal<br/>Supplements</b> | <b>Model 4<br/>Energy</b>              | <b>Model 5<br/>Maternal ADHD<br/>genetic risk</b> | <b>Model 6<br/>Genomic PCs</b>         |
|---------------------------------------------|----------------------------------------|----------------------------------------|---------------------------------------------|----------------------------------------|---------------------------------------------------|----------------------------------------|
| <b>Neurodevelopmental<br/>Diagnosis</b>     | <b>Odds Ratio [95% CI]<br/>p-value</b> | <b>Odds Ratio [95% CI]<br/>p-value</b> | <b>Odds Ratio [95% CI]<br/>p-value</b>      | <b>Odds Ratio [95% CI]<br/>p-value</b> | <b>Odds Ratio [95% CI]<br/>p-value</b>            | <b>Odds Ratio [95% CI]<br/>p-value</b> |
| All Neurodevelopmental Disorder Diagnosis   | 1.53 [1.17 - 2.01] (p = 0.002)         | 1.51 [1.15 - 1.98] (p = 0.003)         | 1.56 [1.19 - 2.05] (p = 0.001)              | 1.59 [1.2 - 2.12] (p = 0.001)          | 1.51 [1.15 - 1.98] (p = 0.003)                    | 1.54 [1.18 - 2.02] (p = 0.002)         |
| ADHD Diagnosis                              | 1.65 [1.21 - 2.26] (p = 0.002)         | 1.63 [1.19 - 2.24] (p = 0.002)         | 1.67 [1.22 - 2.29] (p = 0.002)              | 1.73 [1.25 - 2.44] (p = 0.001)         | 1.63 [1.19 - 2.24] (p = 0.003)                    | 1.69 [1.23 - 2.35] (p = 0.001)         |
| Autism Diagnosis                            | 2.18 [1.32 - 3.66] (p = 0.002)         | 2.25 [1.34 - 3.82] (p = 0.002)         | 2.29 [1.35 - 3.97] (p = 0.002)              | 2.17 [1.22 - 3.95] (p = 0.009)         | 2.26 [1.34 - 3.81] (p = 0.002)                    | 2.31 [1.34 - 4.05] (p = 0.003)         |
| <b>Neurodevelopmental<br/>Symptom Loads</b> | <b>Estimate [95% CI]<br/>p-value</b>   | <b>Estimate [95% CI]<br/>p-value</b>   | <b>Estimate [95% CI]<br/>p-value</b>        | <b>Estimate [95% CI]<br/>p-value</b>   | <b>Estimate [95% CI]<br/>p-value</b>              | <b>Estimate [95% CI]<br/>p-value</b>   |
| ADHD Symptom Load (ADHD-RS)                 | 1.76 [1.01 - 2.52] (p < 0.001)         | 1.73 [0.98 - 2.49] (p < 0.001)         | 1.78 [1.01 - 2.54] (p < 0.001)              | 1.76 [0.99 - 2.52] (p < 0.001)         | 1.68 [0.93 - 2.44] (p < 0.001)                    | 1.78 [1.03 - 2.53] (p < 0.001)         |
| Autism Symptom Load (SRS-2)                 | 3.31 [1.79 - 4.84] (p < 0.001)         | 3.2 [1.68 - 4.73] (p < 0.001)          | 3.26 [1.72 - 4.81] (p < 0.001)              | 3.28 [1.73 - 4.83] (p < 0.001)         | 3.14 [1.61 - 4.67] (p < 0.001)                    | 3.26 [1.74 - 4.78] (p < 0.001)         |

**Supplementary Table S5.** Subanalysis with extra adjustments for the pregnancy Western dietary patterns effect on neurodevelopmental outcomes (multivariable models). **Model 1:** Adjusted for prenatal RCT n-3 LCPUFA. **Model 2:** Adjusted for prenatal RCT high-dose Vitamin D. **Model 3:** Adjusted for prenatal supplements of vitamins, minerals and fatty acids (P1-PC6). **Model 4:** Adjusted for food frequency derived estimated energy intake. **Model 5:** Adjusted for maternal ADHD genetic polygenic risk score **Model 6:** Adjusted for Genomic Principal Components.

|                                           | <b>Male Children</b>               | <b>Female Children</b>             | <b>Interaction</b>               |
|-------------------------------------------|------------------------------------|------------------------------------|----------------------------------|
| <b>Neurodevelopmental Diagnosis</b>       | <b>Odds Ratio [95% CI] p-value</b> | <b>Odds Ratio [95% CI] p-value</b> | <b>Estimate [95% CI] p-value</b> |
| All Neurodevelopmental Disorder Diagnosis | 1.42 [1.02 - 1.99] (p = 0.039)     | 1.86 [1.15 - 3.07] (p = 0.012)     | 0.75 [0.44 - 1.26] (p = 0.271)   |
| ADHD Diagnosis                            | 1.45 [0.99 - 2.12] (p = 0.052)     | 2.48 [1.33 - 4.9] (p = 0.005)      | 0.6 [0.31 - 1.13] (p = 0.120)    |
| Autism Diagnosis                          | 1.83 [0.96 - 3.32] (p = 0.049)     | 4.28 [1.09 - 26.98] (p = 0.059)    | 0.5 [0.13 - 1.52] (p = 0.247)    |
| <b>Parental Questionnaires</b>            | <b>Estimate [95% CI] p-value</b>   | <b>Estimate [95% CI] p-value</b>   | <b>Estimate [95% CI] p-value</b> |
| ADHD Symptom Load (ADHD-RS)               | 1.87 [0.72 - 3.02] (p = 0.002)     | 1.32 [0.4 - 2.25] (p = 0.005)      | 0.66 [-0.73 - 2.06] (p = 0.353)  |
| Autism Symptom Load (SRS-2)               | 3.15 [1 - 5.31] (p = 0.004)        | 2.65 [0.51 - 4.79] (p = 0.016)     | 0.14 [-2.71 - 2.98] (p = 0.926)  |

**Supplementary Table S6.** Sex stratification and statistical interaction effect of the pregnancy Western dietary pattern effect on neurodevelopmental outcomes (multivariable models).

| ADHD Diagnosis Subtypes                                   | n=     | Odds Ratio [95% CI] p-value    | n=  | Odds Ratio [95% CI] p-value                                      |
|-----------------------------------------------------------|--------|--------------------------------|-----|------------------------------------------------------------------|
| ADHD combined presentation (DSM-5)                        | 30/508 | 1.51 [1.03 - 2.20] (p = 0.033) | -   | -                                                                |
| ADHD predominantly inattentive presentation (DSM-5)       | 25/508 | 1.71 [1.13 - 2.56] (p = 0.009) | -   | -                                                                |
| Neurodevelopmental Symptom Loads                          | n=     | Whole Cohort [95% CI] p-value  | n=  | Excluding Neurodevelopmental Disorder Diagnosis [95% CI] p-value |
| ADHD-RS Inattention Score                                 | 513    | 0.98 [0.52 - 1.45] (p < 0.001) | 428 | 0.31 [-0.08 - 0.7] (p = 0.124)                                   |
| ADHD-RS Hyperactivity and Impulsivity Score               | 509    | 0.74 [0.38 - 1.11] (p < 0.001) | 425 | 0.34 [0.01 - 0.67] (p = 0.043)                                   |
| ADHD-RS Total (ADHD Symptom Load)                         | 509    | 1.73 [0.98 - 2.49] (p < 0.001) | 425 | 0.63 [0.01 - 1.25] (p = 0.048)                                   |
| SRS-2 Restricted interests and repetitive behaviour Score | 513    | 0.6 [0.26 - 0.94] (p < 0.001)  | 428 | 0.15 [-0.13 - 0.44] (p = 0.296)                                  |
| SRS-2 Social communication and interaction Score          | 513    | 2.61 [1.35 - 3.87] (p < 0.001) | 428 | 0.88 [-0.29 - 2.05] (p = 0.143)                                  |
| SRS-2 Total (Autism Symptom Load)                         | 513    | 3.21 [1.69 - 4.74] (p < 0.001) | 428 | 1.03 [-0.34 - 2.4] (p = 0.141)                                   |

**Supplementary Table S7.** The pregnancy Western dietary patterns effect on ADHD diagnosis subtypes, and subscores of ADHD and autism symptoms loads (multivariable models). **Column 1:** The entire COPSAC2010 **Column 2:** Subanalysis with any neurodevelopmental disorder diagnosis excluded.

| <b>Neurodevelopmental Diagnosis</b>       |                   | <b>Univariate Model</b>            | <b>Multivariable Model</b>         |
|-------------------------------------------|-------------------|------------------------------------|------------------------------------|
| <b>PC2 Trained in COPSAC2010</b>          | <b>n=</b>         | <b>Odds Ratio [95% CI] p-value</b> | <b>Odds Ratio [95% CI] p-value</b> |
| Any Neurodevelopmental Disorder Diagnosis | 4069/59725 (6.8%) | 1.10 [1.07 - 1.14], p<0.0001)      | 1.03 [1.00 - 1.07], p = 0.087      |
| ADHD Diagnosis                            | 2764/59725 (4.6%) | 1.16 [1.11 - 1.20], p<0.0001       | 1.07 [1.02 - 1.11], p = 0.002      |
| Autism Diagnosis                          | 1639/59725 (2.7%) | 1.06 [1.00-1.11], p=0.030          | 1.04 [0.98-1.09], p=0.351          |
| <b>PC2 Trained in DNBC</b>                | <b>n=</b>         | <b>Odds Ratio [95% CI] p-value</b> | <b>Odds Ratio [95% CI] p-value</b> |
| Any Neurodevelopmental Disorder Diagnosis | 4069/59725 (6.8%) | 1.10 [1.06 - 1.14], p<0.0001)      | 1.03 [1.00 - 1.07], p = 0.054      |
| ADHD Diagnosis                            | 2764/59725 (4.6%) | 1.13 [1.09 - 1.18], p<0.0001       | 1.05 [1.01 - 1.10], p = 0.018      |
| Autism Diagnosis                          | 1639/59725 (2.7%) | 1.06 [1.00-1.11], p=0.020          | 1.04 [0.99-1.10], p=0.130          |

**Supplementary Table S8.** External validation of the association between the pregnancy Western dietary pattern (PC2), trained within COPSAC2010, and within the DNBC and registry derived neurodevelopmental diagnosis in the DNBC cohort.



| BIOCHEMICAL                                                         | SUPER PATHWAY                     | SUB PATHWAY                       | Comp.1<br>(x 10 <sup>-3</sup> ) | Mediating<br>Metabolite |
|---------------------------------------------------------------------|-----------------------------------|-----------------------------------|---------------------------------|-------------------------|
| ergothioneine                                                       | Xenobiotics                       | Food Component/Plant              | -3.737                          | Yes                     |
| carotene diol (1)                                                   | Cofactors and Vitamins            | Vitamin A Metabolism              | -3.125                          | Yes                     |
| branched chain 14:0 dicarboxylic acid                               | Lipid                             | Fatty Acid, Dicarboxylate         | -2.759                          | Yes                     |
| indolepropionate                                                    | Amino Acid                        | Tryptophan Metabolism             | -2.533                          | Yes                     |
| 1-palmitoyl-2-docosahexaenoyl-G PC (16:0/22:6)                      | Lipid                             | Phosphatidylcholine (PC)          | -2.517                          | Yes                     |
| sphingomyelin (d18:2/18:1)*                                         | Lipid                             | Sphingomyelins                    | 2.226                           | Yes                     |
| 1-stearoyl-2-arachidonoyl-GPE (18:0/20:4)                           | Lipid                             | Phosphatidylethanolamine (PE)     | 2.190                           | Yes                     |
| caprate (10:0)                                                      | Lipid                             | Medium Chain Fatty Acid           | 2.164                           | Yes                     |
| tartarate                                                           | Xenobiotics                       | Food Component/Plant              | -2.155                          | Yes                     |
| 3-hydroxystachydrine*                                               | Xenobiotics                       | Food Component/Plant              | -2.054                          | Yes                     |
| caprylate (8:0)                                                     | Lipid                             | Medium Chain Fatty Acid           | 1.985                           | Yes                     |
| branched-chain, straight-chain, or cyclopropyl 10:1 fatty acid (1)* | Partially Characterized Molecules | Partially Characterized Molecules | 1.948                           | Yes                     |
| 1-(1-enyl-stearoyl)-2-oleoyl-GPE (P-18:0/18:1)                      | Lipid                             | Plasmalogen                       | 1.900                           | Yes                     |
| pregnen-diol disulfate*                                             | Lipid                             | Pregnenolone Steroids             | 1.895                           | Yes                     |
| threonate                                                           | Cofactors and Vitamins            | Ascorbate and Aldarate Metabolism | -1.885                          | Yes                     |
| hydroxy-CMPF*                                                       | Lipid                             | Fatty Acid, Dicarboxylate         | -3.485                          | No                      |
| beta-cryptoxanthin                                                  | Cofactors and Vitamins            | Vitamin A Metabolism              | -3.482                          | No                      |
| 3-carboxy-4-methyl-5-propyl-2-furanpropanoate (CMPF)                | Lipid                             | Fatty Acid, Dicarboxylate         | -3.032                          | No                      |
| 2,6-dihydroxybenzoic acid                                           | Xenobiotics                       | Drug - Topical Agents             | -2.912                          | No                      |
| carotene diol (2)                                                   | Cofactors and Vitamins            | Vitamin A Metabolism              | -2.566                          | No                      |
| 1-oleoyl-GPG (18:1)*                                                | Lipid                             | Lysophospholipid                  | 2.494                           | No                      |
| 1-stearoyl-2-docosahexaenoyl-GP C (18:0/22:6)                       | Lipid                             | Phosphatidylcholine (PC)          | -2.443                          | No                      |
| pentose acid*                                                       | Partially Characterized Molecules | Partially Characterized Molecules | -2.413                          | No                      |

|                                             |                        |                                                  |        |    |
|---------------------------------------------|------------------------|--------------------------------------------------|--------|----|
| 2-aminophenol sulfate                       | Xenobiotics            | Chemical                                         | -2.377 | No |
| 1-arachidonoyl-GPE (20:4n6)*                | Lipid                  | Lysophospholipid                                 | 2.363  | No |
| eicosapentaenoylcholine                     | Lipid                  | Fatty Acid Metabolism (Acyl Choline)             | -2.338 | No |
| ethyl beta-glucopyranoside                  | Xenobiotics            | Food Component/Plant                             | -2.267 | No |
| 2-hydroxyarachidate*                        | Lipid                  | Fatty Acid, Monohydroxy                          | 2.263  | No |
| hippurate                                   | Xenobiotics            | Benzoate Metabolism                              | -2.249 | No |
| 3-phenylpropionate (hydrocinnamate)         | Xenobiotics            | Benzoate Metabolism                              | -2.248 | No |
| 1-oleoyl-GPE (18:1)                         | Lipid                  | Lysophospholipid                                 | 2.147  | No |
| tartronate (hydroxymalonate)                | Xenobiotics            | Food Component/Plant                             | -2.108 | No |
| gamma-CEHC                                  | Cofactors and Vitamins | Tocopherol Metabolism                            | 2.052  | No |
| pregnenetriol disulfate*                    | Lipid                  | Pregnenolone Steroids                            | 2.006  | No |
| stachydrine                                 | Xenobiotics            | Food Component/Plant                             | -1.994 | No |
| pyridoxate                                  | Cofactors and Vitamins | Vitamin B6 Metabolism                            | -1.944 | No |
| 1-stearoyl-2-oleoyl-GPC (18:0/18:1)         | Lipid                  | Phosphatidylcholine (PC)                         | 1.943  | No |
| eicosanedioate (C20-DC)                     | Lipid                  | Fatty Acid, Dicarboxylate                        | 1.931  | No |
| sphingosine                                 | Lipid                  | Sphingosines                                     | 1.926  | No |
| 1-stearoyl-2-arachidonoyl-GPC (18:0/20:4)   | Lipid                  | Phosphatidylcholine (PC)                         | 1.897  | No |
| androstenediol (3beta,17beta) disulfate (1) | Lipid                  | Androgenic Steroids                              | 1.884  | No |
| cysteine s-sulfate                          | Amino Acid             | Methionine, Cysteine, SAM and Taurine Metabolism | 1.879  | No |
| 1-linolenoyl-GPC (18:3)*                    | Lipid                  | Lysophospholipid                                 | 1.876  | No |

**Supplementary Table S9.** The 43 metabolites surviving regularisation in the pregnancy Western dietary patterns sparse partial least squares model in COPSAC2010. Metabolites name, super pathway, sub pathways, loadings for component 1 and whether or not the metabolite significantly mediated the association between the Western dietary pattern and any Neurodevelopmental Disorder Diagnosis.

| <b>COPSAC2010 Western Dietary Pattern Metabolite Score Correlation Matrix</b> | <b>Maternal - 24 Weeks Gestation</b>    | <b>Maternal - 1 week Postpartum</b>     | <b>Child - 6 months</b> | <b>Child - 18 months</b> | <b>Child - 6 years</b> |
|-------------------------------------------------------------------------------|-----------------------------------------|-----------------------------------------|-------------------------|--------------------------|------------------------|
| <b>Maternal - 24 Weeks Gestation</b>                                          | <b>1</b>                                | 0,68                                    | 0,42                    | 0,46                     | 0,33                   |
| <b>Maternal - 1 week Postpartum</b>                                           | 0,68                                    | <b>1</b>                                | 0,38                    | 0,40                     | 0,27                   |
| <b>Child - 6 months</b>                                                       | 0,42                                    | 0,38                                    | <b>1</b>                | 0,3                      | 0,21                   |
| <b>Child - 18 months</b>                                                      | 0,46                                    | 0,40                                    | 0,30                    | <b>1</b>                 | 0,39                   |
| <b>Child - 6 years</b>                                                        | 0,33                                    | 0,27                                    | 0,21                    | 0,39                     | <b>1</b>               |
| <b>VDAART Western Dietary Pattern Metabolite Score Correlation Matrix</b>     | <b>Maternal - 10-18 weeks Gestation</b> | <b>Maternal - 32-38 weeks gestation</b> | <b>Child - 1 year</b>   | <b>Child - 3 years</b>   | <b>Child - 6 years</b> |
| <b>Maternal - 10-18 weeks Gestation</b>                                       | <b>1</b>                                | 0,72                                    | 0,48                    | 0,35                     | 0,40                   |
| <b>Maternal - 32-38 weeks gestation</b>                                       | 0,72                                    | <b>1</b>                                | 0,50                    | 0,34                     | 0,41                   |
| <b>Child - 1 year</b>                                                         | 0,48                                    | 0,50                                    | <b>1</b>                | 0,64                     | 0,54                   |
| <b>Child - 3 years</b>                                                        | 0,35                                    | 0,34                                    | 0,64                    | <b>1</b>                 | 0,62                   |
| <b>Child - 6 years</b>                                                        | 0,40                                    | 0,41                                    | 0,54                    | 0,62                     | <b>1</b>               |

**Supplementary Table S10.** Correlation matrices of the respective maternal and child Western dietary pattern Metabolite Scores in the COPSAC2010 and VDAART cohorts.

| Cohort Characteristics                            | COPSAC2010 | VDAART       | p-value | COPSAC2000 | p-value |
|---------------------------------------------------|------------|--------------|---------|------------|---------|
| n =                                               | 600        | 656          |         | 348        |         |
| Age (years) (mean (SD))                           | 10.3 (0.3) | 6.0 (0.1)    | <0.001  | 17.7 (0.6) | <0.001  |
| Male Sex (%)                                      | 310 (51.7) | 341 (52.1)   | 0.934   | 172 (49.4) | 0.55    |
| Caucasian Race (%)                                | 573 (95.5) | 254 (40.3)   | <0.001  | 339 (97.4) | 0.19    |
| Income type (%)                                   |            |              | <0.001  |            | <0.001  |
| Low                                               | 48 (13.0)  | 81 (34.9)    |         | 90 (26.9)  |         |
| Medium                                            | 114 (31.0) | 78 (33.6)    |         | 216 (64.5) |         |
| High                                              | 206 (56.0) | 73 (31.5)    |         | 29 ( 8.7)  |         |
| Maternal Education Attainment at Birth            |            |              | <0.001  |            | <0.001  |
| Low                                               | 46 ( 7.7)  | 232 (36.8)   |         | 186 (55.9) |         |
| Medium                                            | 373 (62.2) | 170 (26.9)   |         | 94 (28.2)  |         |
| High                                              | 181 (30.2) | 229 (36.3)   |         | 53 (15.9)  |         |
| Maternal age at birth (years) (mean (SD))         | 32.4 (4.3) | 25.49 (5.42) | <0.001  | 30.1 (4.6) | <0.001  |
| Maternal Pre-pregnancy Body Mass Index (mean(SD)) | 24.6 (4.4) | 28.5 (7.9)   | <0.001  | -          | -       |
| Birthweight (kilograms) (mean (SD))               | 3.5 (0.5)  | 3.3 (0.6)    | <0.001  | 3.5 (0.5)  | 0.655   |
| Gestational age (days) (mean (SD))                | 279 (12)   | 273 (14)     | <0.001  | 282 (11)   | <0.001  |
| Caesarean section (%)                             | 125 (20.8) | 187 (29.7)   | <0.001  | 74 (21.3)  | 0.941   |
| Maternal smoking during pregnancy (%)             | 44 ( 7.3)  | 18 ( 2.8)    | <0.001  | 79 (22.7)  | <0.001  |
| ADHD Diagnosis (%) / 6 years (VDAART)             | 65 (11.0)  | 18 ( 2.7)    | <0.001  | -          | -       |
| ADHD Diagnosis (%) / Ever 8 years (VDAART)        | 65 (11.0)  | 57 ( 8.7)    | 0.213   | -          | -       |
| ADHD-RS total score (mean(SD))                    | 9.9 (8.7)  | -            | -       | -          | -       |
| ASRS total score (mean(SD))                       | -          | -            | -       | 4.1 (3.9)  | -       |

**Supplementary Table S11.** Cohort characteristics stratified by cohorts. P-values summarise cohort characteristic differences between COPSAC2010/VDAART and COPSAC2010/COPSAC2000 respectively. Low, medium, and high income are defined as <50,000, 50,000 - 110,000, and >110,000 Euro in COPSAC2010/COPSAC2000, and <30,000, 30,000 - 99,999, and >\$100,000 USD in VDAART, respectively. Low, medium and high level educational attainment are defined as “primary, secondary, or college graduate”, “tradesman or bachelor’s degree” and “Masters degree” in COPSAC2010/COPSAC2000 and “Did not graduate from high school/Graduated from high school”, “Technical school/Junior college/some college” and “Graduate school/College graduate” in VDAART.

|                                           | <b>Maternal Pre-pregnancy BMI</b>  | <b>Child Sex (Male)</b>            | <b>Child ADHD Polygenic Risk Score</b> | <b>Child Autism Polygenic Risk Score</b> |
|-------------------------------------------|------------------------------------|------------------------------------|----------------------------------------|------------------------------------------|
| <b>Neurodevelopmental Diagnosis</b>       | <b>Odds Ratio [95% CI] p-value</b> | <b>Odds Ratio [95% CI] p-value</b> | <b>Odds Ratio [95% CI] p-value</b>     | <b>Odds Ratio [95% CI] p-value</b>       |
| All Neurodevelopmental Disorder Diagnosis | 1.04 [0.99 - 1.10] (p = 0.097)     | 2.74 [1.66 - 4.65] (p < 0.001)     | 1.50 [1.16 - 1.94] (p = 0.002)         | 1.30 [1.02 - 1.67] (p = 0.039)           |
| ADHD Diagnosis                            | 1.05 [0.99 - 1.11] (p = 0.102)     | 3.54 [1.94 - 6.79] (p < 0.001)     | 1.60 [1.19 - 2.18] (p = 0.002)         | 1.47 [1.10 - 1.97] (p = 0.009)           |
| Autism Diagnosis                          | 1.13 [1.03 - 1.24] (p = 0.006)     | 1.90 [0.65 - 6.06] (p = 0.250)     | 1.45 [0.83 - 2.56] (p = 0.197)         | 1.44 [0.83 - 2.54] (p = 0.196)           |
| <b>Neurodevelopmental Symptom Loads</b>   | <b>Estimate [95% CI] p-value</b>   | <b>Estimate [95% CI] p-value</b>   | <b>Estimate [95% CI] p-value</b>       | <b>Estimate [95% CI] p-value</b>         |
| ADHD Symptom Load (ADHD-RS)               | 0.24 [0.08 - 0.39] (p = 0.003)     | 4.04 [2.73 - 5.35] (p < 0.001)     | 1.37 [0.68 - 2.05] (p < 0.001)         | 1.20 [0.52 - 1.87] (p < 0.001)           |
| Autism Symptom Load (SRS-2)               | 0.46 [0.15 - 0.78] (p = 0.004)     | 3.98 [1.31 - 6.65] (p = 0.004)     | 1.60 [0.19 - 3.00] (p = 0.026)         | 1.78 [0.40 - 3.16] (p = 0.012)           |

**Supplementary Table S12.** Maternal pre-pregnancy BMI and child sex associations on neurodevelopmental outcomes, with the Western dietary pattern included in multivariable models, shows the independent associations of maternal pre-pregnancy BMI and child sex on neurodevelopmental diagnosis and symptom loads. Furthermore, models show the associations with child ADHD and autism polygenic risk scores (PRS), likewise also adjusted for the Western dietary pattern, on neurodevelopmental diagnosis and symptom loads.

|                                         | Missingness all metabolites (#1131) |                | Missingness selected metabolites (#43) |                |
|-----------------------------------------|-------------------------------------|----------------|----------------------------------------|----------------|
| <b>Neurodevelopmental Diagnosis</b>     | <b>Odds Ratio [95% CI]</b>          | <b>p-value</b> | <b>Odds Ratio [95% CI]</b>             | <b>p-value</b> |
| Any Neurodevelopmental disorder         | OR = 1.004 [0.998; 1.011]           | 0.2            | OR = 1.097 [0.848; 1.403]              | 0.468          |
| ADHD                                    | OR = 1 [0.992; 1.008]               | 0.923          | OR = 0.953 [0.698; 1.273]              | 0.753          |
| Autism                                  | OR = 1.009 [0.994; 1.023]           | 0.213          | OR = 0.961 [0.516; 1.628]              | 0.89           |
| <b>Neurodevelopmental Symptom Loads</b> | <b>Estimate [95% CI]</b>            | <b>p-value</b> | <b>Estimate [95% CI]</b>               | <b>p-value</b> |
| ADHD Symptom Load (ADHD-RS)             | B = 0.002 [0; 0.005]                | 0.084          | B = 0.028 [-0.064; 0.12]               | 0.55           |
| Autism Symptom Load (SRS-2)             | B = 0.001 [-0.001; 0.004]           | 0.356          | B = 0.013 [-0.078; 0.105]              | 0.772          |
| <b>Exposure</b>                         | <b>Estimate [95% CI]</b>            | <b>p-value</b> | <b>Estimate [95% CI]</b>               | <b>p-value</b> |
| Western Dietary Pattern                 | B = 0 [-0.003; 0.002]               | 0.904          | B = 0.106 [0.016; 0.196]               | 0.021          |

**Supplementary Table S13.** Analysis of missing metabolites and their association with neurodevelopmental outcomes. Missingness rates of all metabolites and the selected 43 metabolites in the pregnancy Western dietary pattern metabolite score, alongside their odds ratios and confidence intervals for neurodevelopmental disorders, symptom loads and the Western dietary pattern.
